# Supplementary material
Source: publisher figshare collection journal article supplement (https://acs.figshare.com/ndownloader/files/8061887)
Supplement: Supplementary file 1 [file 8061887]

data_2_1065j
 
_audit_creation_method            SHELXL-97
_chemical_name_systematic
;
 ?
;
_chemical_name_common             ?
_chemical_melting_point           ?
_chemical_formula_moiety          ?
_chemical_formula_sum
 'C30 H74 O4 Si7 Sm'
_chemical_formula_weight          845.87
 
loop_
 _atom_type_symbol
 _atom_type_description
 _atom_type_scat_dispersion_real
 _atom_type_scat_dispersion_imag
 _atom_type_scat_source
 'C'  'C'   0.0033   0.0016
 'International Tables Vol C Tables 4.2.6.8 and 6.1.1.4'
 'H'  'H'   0.0000   0.0000
 'International Tables Vol C Tables 4.2.6.8 and 6.1.1.4'
 'O'  'O'   0.0106   0.0060
 'International Tables Vol C Tables 4.2.6.8 and 6.1.1.4'
 'Si'  'Si'   0.0817   0.0704
 'International Tables Vol C Tables 4.2.6.8 and 6.1.1.4'
 'Sm'  'Sm'  -0.1638   3.4418
 'International Tables Vol C Tables 4.2.6.8 and 6.1.1.4'
 
_symmetry_cell_setting            monoclinic
_symmetry_space_group_name_H-M    P2(1)/c
 
loop_
 _symmetry_equiv_pos_as_xyz
 'x, y, z'
 '-x, y+1/2, -z+1/2'
 '-x, -y, -z'
 'x, -y-1/2, z-1/2'
 
_cell_length_a                    10.182(2)
_cell_length_b                    20.869(4)
_cell_length_c                    22.152(4)
_cell_angle_alpha                 90.00
_cell_angle_beta                  102.83(3)
_cell_angle_gamma                 90.00
_cell_volume                      4589.3(16)
_cell_formula_units_Z             4
_cell_measurement_temperature     100(2)
_cell_measurement_reflns_used     13051
_cell_measurement_theta_min       4.516
_cell_measurement_theta_max       52.509
 
_exptl_crystal_description        plates
_exptl_crystal_colour             green
_exptl_crystal_size_max           0.34
_exptl_crystal_size_mid           0.34
_exptl_crystal_size_min           0.14
_exptl_crystal_density_meas       ?
_exptl_crystal_density_diffrn     1.224
_exptl_crystal_density_method     'not measured'
_exptl_crystal_F_000              1784
_exptl_absorpt_coefficient_mu     1.490
_exptl_absorpt_correction_type    multi-scan
_exptl_absorpt_correction_T_min   0.6314
_exptl_absorpt_correction_T_max   0.8186
_exptl_absorpt_process_details    SADABS
 
_exptl_special_details
;
 ?
;
 
_diffrn_ambient_temperature       100(2)
_diffrn_radiation_wavelength      0.71073
_diffrn_radiation_type            MoK\a
_diffrn_radiation_source          'fine-focus sealed tube'
_diffrn_radiation_monochromator   graphite
_diffrn_measurement_device_type   'SMART APEX''
_diffrn_measurement_method        '\w scans'
_diffrn_detector_area_resol_mean  ?
_diffrn_standards_number          ?
_diffrn_standards_interval_count  ?
_diffrn_standards_interval_time   ?
_diffrn_standards_decay_%         ?
_diffrn_reflns_number             36096
_diffrn_reflns_av_R_equivalents   0.0499
_diffrn_reflns_av_sigmaI/netI     0.0443
_diffrn_reflns_limit_h_min        -12
_diffrn_reflns_limit_h_max        12
_diffrn_reflns_limit_k_min        -26
_diffrn_reflns_limit_k_max        26
_diffrn_reflns_limit_l_min        -27
_diffrn_reflns_limit_l_max        27
_diffrn_reflns_theta_min          1.36
_diffrn_reflns_theta_max          26.43
_reflns_number_total              9410
_reflns_number_gt                 8241
_reflns_threshold_expression      >2sigma(I)
 
_computing_data_collection        'Bruker XSCANS' 
_computing_cell_refinement        'Bruker XSCANS' 
_computing_data_reduction         'Bruker SHELXTL' 
_computing_structure_solution     'SHELXS-97 (Sheldrick, 1990)' 
_computing_structure_refinement   'SHELXL-97 (Sheldrick, 1997)' 
_computing_molecular_graphics     'Bruker SHELXTL' 
_computing_publication_material   'Bruker SHELXTL' 
 
_refine_special_details
;
 Refinement of F^2^ against ALL reflections.  The weighted R-factor wR and
 goodness of fit S are based on F^2^, conventional R-factors R are based
 on F, with F set to zero for negative F^2^. The threshold expression of
 F^2^ > 2sigma(F^2^) is used only for calculating R-factors(gt) etc. and is
 not relevant to the choice of reflections for refinement.  R-factors based
 on F^2^ are statistically about twice as large as those based on F, and R-
 factors based on ALL data will be even larger.
;
 
_refine_ls_structure_factor_coef  Fsqd
_refine_ls_matrix_type            full
_refine_ls_weighting_scheme       calc
_refine_ls_weighting_details
 'calc w=1/[\s^2^(Fo^2^)+(0.0573P)^2^+1.8888P] where P=(Fo^2^+2Fc^2^)/3'
_atom_sites_solution_primary      direct
_atom_sites_solution_secondary    difmap
_atom_sites_solution_hydrogens    geom
_refine_ls_hydrogen_treatment     constr
_refine_ls_extinction_method      none
_refine_ls_extinction_coef        ?
_refine_ls_number_reflns          9410
_refine_ls_number_parameters      393
_refine_ls_number_restraints      0
_refine_ls_R_factor_all           0.0537
_refine_ls_R_factor_gt            0.0454
_refine_ls_wR_factor_ref          0.1064
_refine_ls_wR_factor_gt           0.1027
_refine_ls_goodness_of_fit_ref    1.103
_refine_ls_restrained_S_all       1.103
_refine_ls_shift/su_max           0.000
_refine_ls_shift/su_mean          0.000
 
loop_
 _atom_site_label
 _atom_site_type_symbol
 _atom_site_fract_x
 _atom_site_fract_y
 _atom_site_fract_z
 _atom_site_U_iso_or_equiv
 _atom_site_adp_type
 _atom_site_occupancy
 _atom_site_symmetry_multiplicity
 _atom_site_calc_flag
 _atom_site_refinement_flags
 _atom_site_disorder_assembly
 _atom_site_disorder_group
Sm1 Sm 0.221326(18) 1.007254(8) 0.243861(8) 0.01932(7) Uani 1 1 d . . .
Si1 Si 0.23219(10) 0.89239(5) 0.33926(4) 0.0196(2) Uani 1 1 d . . .
Si2 Si 0.19177(11) 0.82130(5) 0.25290(5) 0.0244(2) Uani 1 1 d . . .
Si3 Si 0.21206(10) 0.88049(4) 0.16381(4) 0.0200(2) Uani 1 1 d . . .
Si4 Si 0.04750(10) 0.88085(5) 0.38511(5) 0.0227(2) Uani 1 1 d . . .
Si5 Si 0.40584(10) 0.85006(5) 0.41610(5) 0.0256(2) Uani 1 1 d . . .
Si6 Si 0.08054(11) 0.82612(5) 0.07996(5) 0.0236(2) Uani 1 1 d . . .
Si7 Si 0.43151(10) 0.86177(5) 0.15248(5) 0.0264(2) Uani 1 1 d . . .
O1 O 0.1771(3) 1.10075(13) 0.31342(13) 0.0327(6) Uani 1 1 d . . .
O2 O -0.0280(3) 1.03521(12) 0.20468(13) 0.0321(6) Uani 1 1 d . . .
O3 O 0.2499(3) 1.08421(12) 0.15378(12) 0.0296(6) Uani 1 1 d . . .
O4 O 0.4602(2) 1.04923(12) 0.28823(11) 0.0271(6) Uani 1 1 d . . .
C1 C 0.0966(4) 1.0863(2) 0.3580(2) 0.0382(10) Uani 1 1 d . . .
H1A H 0.0806 1.0396 0.3599 0.046 Uiso 1 1 calc R . .
H1B H 0.0088 1.1087 0.3474 0.046 Uiso 1 1 calc R . .
C2 C 0.1813(4) 1.1106(2) 0.4186(2) 0.0369(10) Uani 1 1 d . . .
H2A H 0.2528 1.0796 0.4368 0.044 Uiso 1 1 calc R . .
H2B H 0.1252 1.1195 0.4489 0.044 Uiso 1 1 calc R . .
C3 C 0.2406(4) 1.17204(19) 0.39869(19) 0.0344(9) Uani 1 1 d . . .
H3A H 0.1790 1.2087 0.3988 0.041 Uiso 1 1 calc R . .
H3B H 0.3287 1.1819 0.4265 0.041 Uiso 1 1 calc R . .
C4 C 0.2569(4) 1.15769(18) 0.3335(2) 0.0343(10) Uani 1 1 d . . .
H4A H 0.2242 1.1941 0.3056 0.041 Uiso 1 1 calc R . .
H4B H 0.3527 1.1499 0.3334 0.041 Uiso 1 1 calc R . .
C5 C -0.1231(4) 0.98808(19) 0.1720(2) 0.0314(9) Uani 1 1 d . . .
H5A H -0.1856 0.9740 0.1979 0.038 Uiso 1 1 calc R . .
H5B H -0.0753 0.9501 0.1608 0.038 Uiso 1 1 calc R . .
C6 C -0.1984(5) 1.0224(2) 0.1147(2) 0.0407(10) Uani 1 1 d . . .
H6A H -0.2885 1.0033 0.0989 0.049 Uiso 1 1 calc R . .
H6B H -0.1474 1.0217 0.0816 0.049 Uiso 1 1 calc R . .
C7 C -0.2091(4) 1.0898(2) 0.13896(19) 0.0353(10) Uani 1 1 d . . .
H7A H -0.2223 1.1217 0.1050 0.042 Uiso 1 1 calc R . .
H7B H -0.2841 1.0933 0.1605 0.042 Uiso 1 1 calc R . .
C8 C -0.0740(4) 1.09891(19) 0.1836(2) 0.0377(10) Uani 1 1 d . . .
H8A H -0.0091 1.1196 0.1625 0.045 Uiso 1 1 calc R . .
H8B H -0.0839 1.1260 0.2190 0.045 Uiso 1 1 calc R . .
C9 C 0.2471(4) 1.0600(2) 0.09244(18) 0.0338(9) Uani 1 1 d . . .
H9A H 0.1614 1.0712 0.0634 0.041 Uiso 1 1 calc R . .
H9B H 0.2584 1.0129 0.0930 0.041 Uiso 1 1 calc R . .
C10 C 0.3650(5) 1.0930(2) 0.0743(2) 0.0428(11) Uani 1 1 d . . .
H10A H 0.3501 1.0972 0.0288 0.051 Uiso 1 1 calc R . .
H10B H 0.4497 1.0691 0.0900 0.051 Uiso 1 1 calc R . .
C11 C 0.3689(5) 1.1585(2) 0.1052(2) 0.0457(12) Uani 1 1 d . . .
H11A H 0.4619 1.1695 0.1271 0.055 Uiso 1 1 calc R . .
H11B H 0.3349 1.1922 0.0743 0.055 Uiso 1 1 calc R . .
C12 C 0.2777(4) 1.15160(19) 0.1507(2) 0.0405(11) Uani 1 1 d . . .
H12A H 0.3232 1.1680 0.1920 0.049 Uiso 1 1 calc R . .
H12B H 0.1931 1.1759 0.1361 0.049 Uiso 1 1 calc R . .
C13 C 0.5521(4) 1.0833(2) 0.2585(2) 0.0365(10) Uani 1 1 d . . .
H13A H 0.5302 1.1296 0.2555 0.044 Uiso 1 1 calc R . .
H13B H 0.5469 1.0664 0.2163 0.044 Uiso 1 1 calc R . .
C14 C 0.6908(4) 1.0725(2) 0.2988(2) 0.0361(10) Uani 1 1 d . . .
H14A H 0.7313 1.0323 0.2876 0.043 Uiso 1 1 calc R . .
H14B H 0.7517 1.1088 0.2959 0.043 Uiso 1 1 calc R . .
C15 C 0.6616(4) 1.0681(2) 0.3624(2) 0.0418(11) Uani 1 1 d . . .
H15A H 0.7333 1.0443 0.3912 0.050 Uiso 1 1 calc R . .
H15B H 0.6524 1.1112 0.3797 0.050 Uiso 1 1 calc R . .
C16 C 0.5304(4) 1.0324(2) 0.35080(19) 0.0371(10) Uani 1 1 d . . .
H16A H 0.5465 0.9856 0.3543 0.045 Uiso 1 1 calc R . .
H16B H 0.4769 1.0453 0.3810 0.045 Uiso 1 1 calc R . .
C17 C 0.3012(5) 0.7464(2) 0.2675(2) 0.0461(12) Uani 1 1 d . . .
H17A H 0.2787 0.7218 0.3015 0.069 Uiso 1 1 calc R . .
H17B H 0.3963 0.7589 0.2786 0.069 Uiso 1 1 calc R . .
H17C H 0.2848 0.7201 0.2299 0.069 Uiso 1 1 calc R . .
C18 C 0.0151(5) 0.7871(2) 0.2369(2) 0.0465(12) Uani 1 1 d . . .
H18A H -0.0012 0.7621 0.1985 0.070 Uiso 1 1 calc R . .
H18B H -0.0503 0.8221 0.2327 0.070 Uiso 1 1 calc R . .
H18C H 0.0054 0.7592 0.2713 0.070 Uiso 1 1 calc R . .
C19 C 0.0764(5) 0.9234(2) 0.4623(2) 0.0401(11) Uani 1 1 d . . .
H19A H -0.0097 0.9282 0.4747 0.060 Uiso 1 1 calc R . .
H19B H 0.1152 0.9658 0.4586 0.060 Uiso 1 1 calc R . .
H19C H 0.1385 0.8983 0.4935 0.060 Uiso 1 1 calc R . .
C20 C -0.0117(4) 0.79774(19) 0.40076(19) 0.0324(9) Uani 1 1 d . . .
H20A H 0.0651 0.7725 0.4231 0.049 Uiso 1 1 calc R . .
H20B H -0.0514 0.7767 0.3614 0.049 Uiso 1 1 calc R . .
H20C H -0.0793 0.8010 0.4259 0.049 Uiso 1 1 calc R . .
C21 C -0.1062(4) 0.9200(2) 0.3353(2) 0.0444(12) Uani 1 1 d . . .
H21A H -0.1792 0.9206 0.3576 0.067 Uiso 1 1 calc R . .
H21B H -0.1349 0.8957 0.2967 0.067 Uiso 1 1 calc R . .
H21C H -0.0843 0.9640 0.3257 0.067 Uiso 1 1 calc R . .
C22 C 0.5708(4) 0.8380(2) 0.3922(2) 0.0455(12) Uani 1 1 d . . .
H22A H 0.6037 0.8794 0.3806 0.068 Uiso 1 1 calc R . .
H22B H 0.5574 0.8088 0.3568 0.068 Uiso 1 1 calc R . .
H22C H 0.6371 0.8197 0.4269 0.068 Uiso 1 1 calc R . .
C23 C 0.4470(5) 0.9090(2) 0.4819(2) 0.0511(13) Uani 1 1 d . . .
H23A H 0.3642 0.9207 0.4950 0.077 Uiso 1 1 calc R . .
H23B H 0.4873 0.9475 0.4683 0.077 Uiso 1 1 calc R . .
H23C H 0.5107 0.8895 0.5168 0.077 Uiso 1 1 calc R . .
C24 C 0.3706(4) 0.77128(19) 0.45115(19) 0.0355(10) Uani 1 1 d . . .
H24A H 0.4525 0.7562 0.4797 0.053 Uiso 1 1 calc R . .
H24B H 0.3420 0.7396 0.4182 0.053 Uiso 1 1 calc R . .
H24C H 0.2990 0.7771 0.4738 0.053 Uiso 1 1 calc R . .
C25 C 0.1055(4) 0.73635(17) 0.07990(18) 0.0298(9) Uani 1 1 d . . .
H25A H 0.0392 0.7173 0.0457 0.045 Uiso 1 1 calc R . .
H25B H 0.0935 0.7185 0.1192 0.045 Uiso 1 1 calc R . .
H25C H 0.1966 0.7267 0.0748 0.045 Uiso 1 1 calc R . .
C26 C 0.1138(5) 0.85601(19) 0.00450(17) 0.0358(10) Uani 1 1 d . . .
H26A H 0.2029 0.8415 0.0004 0.054 Uiso 1 1 calc R . .
H26B H 0.1108 0.9029 0.0038 0.054 Uiso 1 1 calc R . .
H26C H 0.0449 0.8391 -0.0299 0.054 Uiso 1 1 calc R . .
C27 C -0.1064(4) 0.8409(2) 0.07206(19) 0.0344(9) Uani 1 1 d . . .
H27A H -0.1579 0.8136 0.0392 0.052 Uiso 1 1 calc R . .
H27B H -0.1267 0.8860 0.0616 0.052 Uiso 1 1 calc R . .
H27C H -0.1311 0.8309 0.1113 0.052 Uiso 1 1 calc R . .
C28 C 0.4880(5) 0.7774(2) 0.1442(3) 0.0593(15) Uani 1 1 d . . .
H28A H 0.4290 0.7574 0.1080 0.089 Uiso 1 1 calc R . .
H28B H 0.4836 0.7530 0.1815 0.089 Uiso 1 1 calc R . .
H28C H 0.5809 0.7776 0.1387 0.089 Uiso 1 1 calc R . .
C29 C 0.4711(5) 0.9021(3) 0.0824(2) 0.0596(15) Uani 1 1 d . . .
H29A H 0.5667 0.8962 0.0826 0.089 Uiso 1 1 calc R . .
H29B H 0.4510 0.9480 0.0834 0.089 Uiso 1 1 calc R . .
H29C H 0.4160 0.8830 0.0447 0.089 Uiso 1 1 calc R . .
C30 C 0.5548(5) 0.8964(3) 0.2202(2) 0.0705(18) Uani 1 1 d . . .
H30A H 0.5385 0.8782 0.2587 0.106 Uiso 1 1 calc R . .
H30B H 0.5437 0.9431 0.2207 0.106 Uiso 1 1 calc R . .
H30C H 0.6467 0.8862 0.2167 0.106 Uiso 1 1 calc R . .
 
loop_
 _atom_site_aniso_label
 _atom_site_aniso_U_11
 _atom_site_aniso_U_22
 _atom_site_aniso_U_33
 _atom_site_aniso_U_23
 _atom_site_aniso_U_13
 _atom_site_aniso_U_12
Sm1 0.01878(11) 0.01562(11) 0.02353(11) -0.00094(7) 0.00464(8) -0.00062(7)
Si1 0.0187(5) 0.0207(5) 0.0195(5) -0.0016(4) 0.0047(4) -0.0027(4)
Si2 0.0321(6) 0.0212(5) 0.0208(5) -0.0017(4) 0.0074(4) -0.0071(4)
Si3 0.0229(5) 0.0180(5) 0.0200(5) -0.0008(4) 0.0065(4) -0.0015(4)
Si4 0.0181(5) 0.0233(5) 0.0274(5) 0.0044(4) 0.0065(4) -0.0005(4)
Si5 0.0183(5) 0.0267(5) 0.0300(6) -0.0014(4) 0.0017(4) 0.0001(4)
Si6 0.0297(6) 0.0209(5) 0.0195(5) -0.0011(4) 0.0037(4) -0.0023(4)
Si7 0.0237(5) 0.0248(5) 0.0319(6) -0.0007(4) 0.0091(5) 0.0003(4)
O1 0.0274(15) 0.0281(14) 0.0447(17) -0.0137(12) 0.0122(13) -0.0058(12)
O2 0.0233(14) 0.0219(14) 0.0482(17) 0.0033(12) 0.0020(13) -0.0002(11)
O3 0.0323(15) 0.0248(14) 0.0334(15) 0.0088(11) 0.0106(12) 0.0005(11)
O4 0.0207(13) 0.0346(15) 0.0258(14) 0.0052(11) 0.0045(11) -0.0054(11)
C1 0.027(2) 0.034(2) 0.059(3) -0.010(2) 0.019(2) -0.0075(17)
C2 0.028(2) 0.040(2) 0.045(3) 0.003(2) 0.0124(19) -0.0003(18)
C3 0.032(2) 0.031(2) 0.038(2) -0.0054(18) 0.0039(19) -0.0045(17)
C4 0.031(2) 0.022(2) 0.053(3) -0.0077(18) 0.016(2) -0.0041(16)
C5 0.023(2) 0.030(2) 0.040(2) 0.0031(17) 0.0050(18) -0.0041(16)
C6 0.040(3) 0.044(3) 0.036(2) 0.004(2) 0.004(2) 0.002(2)
C7 0.031(2) 0.042(2) 0.034(2) 0.0085(18) 0.0103(19) 0.0097(18)
C8 0.029(2) 0.025(2) 0.060(3) 0.007(2) 0.011(2) 0.0049(17)
C9 0.035(2) 0.037(2) 0.029(2) 0.0058(17) 0.0035(18) -0.0030(18)
C10 0.039(3) 0.052(3) 0.038(3) 0.012(2) 0.010(2) -0.007(2)
C11 0.046(3) 0.047(3) 0.042(3) 0.013(2) 0.007(2) -0.017(2)
C12 0.036(2) 0.029(2) 0.052(3) 0.0070(19) 0.000(2) 0.0023(18)
C13 0.021(2) 0.045(3) 0.044(3) 0.016(2) 0.0093(19) -0.0040(18)
C14 0.020(2) 0.038(2) 0.048(3) 0.0096(19) 0.0031(19) 0.0003(17)
C15 0.030(2) 0.051(3) 0.041(3) -0.006(2) -0.002(2) -0.007(2)
C16 0.035(2) 0.047(3) 0.028(2) 0.0030(19) 0.0014(19) -0.009(2)
C17 0.085(4) 0.022(2) 0.033(2) 0.0030(17) 0.015(2) 0.012(2)
C18 0.048(3) 0.062(3) 0.031(2) -0.008(2) 0.011(2) -0.033(2)
C19 0.047(3) 0.041(3) 0.041(3) -0.008(2) 0.027(2) -0.008(2)
C20 0.032(2) 0.034(2) 0.034(2) 0.0079(17) 0.0111(18) -0.0085(17)
C21 0.020(2) 0.041(3) 0.070(3) 0.016(2) 0.004(2) 0.0006(18)
C22 0.024(2) 0.042(3) 0.074(3) 0.011(2) 0.019(2) 0.0039(19)
C23 0.042(3) 0.057(3) 0.044(3) -0.014(2) -0.013(2) 0.006(2)
C24 0.030(2) 0.040(2) 0.036(2) 0.0142(18) 0.0064(19) 0.0014(18)
C25 0.036(2) 0.025(2) 0.028(2) -0.0043(16) 0.0072(18) -0.0023(17)
C26 0.053(3) 0.031(2) 0.022(2) 0.0022(16) 0.0047(19) -0.0036(19)
C27 0.028(2) 0.036(2) 0.035(2) -0.0050(18) -0.0017(18) -0.0057(18)
C28 0.038(3) 0.037(3) 0.109(5) 0.003(3) 0.030(3) 0.009(2)
C29 0.041(3) 0.081(4) 0.064(4) 0.025(3) 0.029(3) 0.013(3)
C30 0.031(3) 0.121(5) 0.061(4) -0.034(3) 0.011(3) -0.025(3)
 
_geom_special_details
;
 All esds (except the esd in the dihedral angle between two l.s. planes)
 are estimated using the full covariance matrix.  The cell esds are taken
 into account individually in the estimation of esds in distances, angles
 and torsion angles; correlations between esds in cell parameters are only
 used when they are defined by crystal symmetry.  An approximate (isotropic)
 treatment of cell esds is used for estimating esds involving l.s. planes.
;
 
loop_
 _geom_bond_atom_site_label_1
 _geom_bond_atom_site_label_2
 _geom_bond_distance
 _geom_bond_site_symmetry_2
 _geom_bond_publ_flag
Sm1 O2 2.561(3) . ?
Sm1 O4 2.567(3) . ?
Sm1 O1 2.587(3) . ?
Sm1 O3 2.627(2) . ?
Sm1 Si3 3.1746(11) . ?
Sm1 Si1 3.1813(11) . ?
Si1 Si5 2.3382(16) . ?
Si1 Si4 2.3397(15) . ?
Si1 Si2 2.3833(14) . ?
Si2 C18 1.894(4) . ?
Si2 C17 1.904(4) . ?
Si2 Si3 2.3759(14) . ?
Si3 Si6 2.3294(15) . ?
Si3 Si7 2.3360(15) . ?
Si4 C21 1.889(4) . ?
Si4 C19 1.890(4) . ?
Si4 C20 1.893(4) . ?
Si5 C23 1.882(4) . ?
Si5 C24 1.886(4) . ?
Si5 C22 1.886(4) . ?
Si6 C26 1.884(4) . ?
Si6 C25 1.891(4) . ?
Si6 C27 1.898(4) . ?
Si7 C30 1.875(5) . ?
Si7 C28 1.875(5) . ?
Si7 C29 1.886(5) . ?
O1 C1 1.448(5) . ?
O1 C4 1.452(4) . ?
O2 C8 1.452(4) . ?
O2 C5 1.455(5) . ?
O3 C12 1.439(5) . ?
O3 C9 1.444(5) . ?
O4 C13 1.445(4) . ?
O4 C16 1.454(5) . ?
C1 C2 1.513(6) . ?
C2 C3 1.524(5) . ?
C3 C4 1.520(6) . ?
C5 C6 1.509(6) . ?
C6 C7 1.519(6) . ?
C7 C8 1.517(6) . ?
C9 C10 1.513(6) . ?
C10 C11 1.525(6) . ?
C11 C12 1.521(6) . ?
C13 C14 1.511(6) . ?
C14 C15 1.506(6) . ?
C15 C16 1.502(6) . ?
 
loop_
 _geom_angle_atom_site_label_1
 _geom_angle_atom_site_label_2
 _geom_angle_atom_site_label_3
 _geom_angle
 _geom_angle_site_symmetry_1
 _geom_angle_site_symmetry_3
 _geom_angle_publ_flag
O2 Sm1 O4 146.69(9) . . ?
O2 Sm1 O1 74.90(9) . . ?
O4 Sm1 O1 77.88(8) . . ?
O2 Sm1 O3 82.64(9) . . ?
O4 Sm1 O3 80.04(8) . . ?
O1 Sm1 O3 93.13(9) . . ?
O2 Sm1 Si3 95.53(7) . . ?
O4 Sm1 Si3 113.98(6) . . ?
O1 Sm1 Si3 166.84(6) . . ?
O3 Sm1 Si3 94.57(6) . . ?
O2 Sm1 Si1 106.40(7) . . ?
O4 Sm1 Si1 96.47(6) . . ?
O1 Sm1 Si1 99.07(7) . . ?
O3 Sm1 Si1 166.34(6) . . ?
Si3 Sm1 Si1 74.66(3) . . ?
Si5 Si1 Si4 101.29(5) . . ?
Si5 Si1 Si2 108.49(6) . . ?
Si4 Si1 Si2 105.80(5) . . ?
Si5 Si1 Sm1 132.64(5) . . ?
Si4 Si1 Sm1 116.95(5) . . ?
Si2 Si1 Sm1 87.80(4) . . ?
C18 Si2 C17 102.6(2) . . ?
C18 Si2 Si3 107.15(15) . . ?
C17 Si2 Si3 114.32(14) . . ?
C18 Si2 Si1 111.86(15) . . ?
C17 Si2 Si1 112.61(15) . . ?
Si3 Si2 Si1 108.16(5) . . ?
Si6 Si3 Si7 103.12(6) . . ?
Si6 Si3 Si2 105.58(5) . . ?
Si7 Si3 Si2 105.31(6) . . ?
Si6 Si3 Sm1 142.36(5) . . ?
Si7 Si3 Sm1 106.79(4) . . ?
Si2 Si3 Sm1 88.08(4) . . ?
C21 Si4 C19 105.5(2) . . ?
C21 Si4 C20 104.31(19) . . ?
C19 Si4 C20 104.89(19) . . ?
C21 Si4 Si1 110.07(15) . . ?
C19 Si4 Si1 111.44(14) . . ?
C20 Si4 Si1 119.53(14) . . ?
C23 Si5 C24 106.3(2) . . ?
C23 Si5 C22 104.2(2) . . ?
C24 Si5 C22 105.19(19) . . ?
C23 Si5 Si1 108.60(16) . . ?
C24 Si5 Si1 116.53(14) . . ?
C22 Si5 Si1 115.00(16) . . ?
C26 Si6 C25 106.08(18) . . ?
C26 Si6 C27 103.8(2) . . ?
C25 Si6 C27 107.07(18) . . ?
C26 Si6 Si3 111.20(14) . . ?
C25 Si6 Si3 115.45(13) . . ?
C27 Si6 Si3 112.41(13) . . ?
C30 Si7 C28 106.0(3) . . ?
C30 Si7 C29 105.0(3) . . ?
C28 Si7 C29 102.3(3) . . ?
C30 Si7 Si3 109.63(17) . . ?
C28 Si7 Si3 119.29(16) . . ?
C29 Si7 Si3 113.45(16) . . ?
C1 O1 C4 108.9(3) . . ?
C1 O1 Sm1 116.7(2) . . ?
C4 O1 Sm1 129.8(2) . . ?
C8 O2 C5 109.1(3) . . ?
C8 O2 Sm1 122.8(2) . . ?
C5 O2 Sm1 121.0(2) . . ?
C12 O3 C9 105.1(3) . . ?
C12 O3 Sm1 133.6(2) . . ?
C9 O3 Sm1 121.2(2) . . ?
C13 O4 C16 108.8(3) . . ?
C13 O4 Sm1 130.4(2) . . ?
C16 O4 Sm1 120.4(2) . . ?
O1 C1 C2 103.8(3) . . ?
C1 C2 C3 102.1(3) . . ?
C4 C3 C2 104.1(3) . . ?
O1 C4 C3 106.3(3) . . ?
O2 C5 C6 104.8(3) . . ?
C5 C6 C7 101.8(3) . . ?
C8 C7 C6 102.7(3) . . ?
O2 C8 C7 106.0(3) . . ?
O3 C9 C10 103.9(3) . . ?
C9 C10 C11 103.4(4) . . ?
C12 C11 C10 104.7(3) . . ?
O3 C12 C11 106.2(3) . . ?
O4 C13 C14 105.8(3) . . ?
C15 C14 C13 102.1(3) . . ?
C16 C15 C14 102.8(3) . . ?
O4 C16 C15 105.9(3) . . ?
 
loop_
 _geom_torsion_atom_site_label_1
 _geom_torsion_atom_site_label_2
 _geom_torsion_atom_site_label_3
 _geom_torsion_atom_site_label_4
 _geom_torsion
 _geom_torsion_site_symmetry_1
 _geom_torsion_site_symmetry_2
 _geom_torsion_site_symmetry_3
 _geom_torsion_site_symmetry_4
 _geom_torsion_publ_flag
O2 Sm1 Si1 Si5 -162.71(8) . . . . ?
O4 Sm1 Si1 Si5 -7.19(9) . . . . ?
O1 Sm1 Si1 Si5 -85.90(9) . . . . ?
O3 Sm1 Si1 Si5 67.1(3) . . . . ?
Si3 Sm1 Si1 Si5 105.95(7) . . . . ?
O2 Sm1 Si1 Si4 -22.66(8) . . . . ?
O4 Sm1 Si1 Si4 132.86(7) . . . . ?
O1 Sm1 Si1 Si4 54.16(8) . . . . ?
O3 Sm1 Si1 Si4 -152.9(3) . . . . ?
Si3 Sm1 Si1 Si4 -114.00(5) . . . . ?
O2 Sm1 Si1 Si2 83.96(8) . . . . ?
O4 Sm1 Si1 Si2 -120.52(7) . . . . ?
O1 Sm1 Si1 Si2 160.78(7) . . . . ?
O3 Sm1 Si1 Si2 -46.2(3) . . . . ?
Si3 Sm1 Si1 Si2 -7.38(4) . . . . ?
Si5 Si1 Si2 C18 117.66(18) . . . . ?
Si4 Si1 Si2 C18 9.66(18) . . . . ?
Sm1 Si1 Si2 C18 -107.75(17) . . . . ?
Si5 Si1 Si2 C17 2.76(18) . . . . ?
Si4 Si1 Si2 C17 -105.24(17) . . . . ?
Sm1 Si1 Si2 C17 137.34(17) . . . . ?
Si5 Si1 Si2 Si3 -124.56(6) . . . . ?
Si4 Si1 Si2 Si3 127.44(6) . . . . ?
Sm1 Si1 Si2 Si3 10.03(5) . . . . ?
C18 Si2 Si3 Si6 -33.69(18) . . . . ?
C17 Si2 Si3 Si6 79.23(18) . . . . ?
Si1 Si2 Si3 Si6 -154.45(5) . . . . ?
C18 Si2 Si3 Si7 -142.40(17) . . . . ?
C17 Si2 Si3 Si7 -29.48(18) . . . . ?
Si1 Si2 Si3 Si7 96.84(6) . . . . ?
C18 Si2 Si3 Sm1 110.71(17) . . . . ?
C17 Si2 Si3 Sm1 -136.37(18) . . . . ?
Si1 Si2 Si3 Sm1 -10.05(5) . . . . ?
O2 Sm1 Si3 Si6 15.23(10) . . . . ?
O4 Sm1 Si3 Si6 -148.91(9) . . . . ?
O1 Sm1 Si3 Si6 57.8(3) . . . . ?
O3 Sm1 Si3 Si6 -67.80(10) . . . . ?
Si1 Sm1 Si3 Si6 120.76(8) . . . . ?
O2 Sm1 Si3 Si7 156.45(7) . . . . ?
O4 Sm1 Si3 Si7 -7.69(8) . . . . ?
O1 Sm1 Si3 Si7 -160.9(3) . . . . ?
O3 Sm1 Si3 Si7 73.43(8) . . . . ?
Si1 Sm1 Si3 Si7 -98.02(5) . . . . ?
O2 Sm1 Si3 Si2 -98.13(7) . . . . ?
O4 Sm1 Si3 Si2 97.73(7) . . . . ?
O1 Sm1 Si3 Si2 -55.5(3) . . . . ?
O3 Sm1 Si3 Si2 178.85(7) . . . . ?
Si1 Sm1 Si3 Si2 7.40(4) . . . . ?
Si5 Si1 Si4 C21 174.03(16) . . . . ?
Si2 Si1 Si4 C21 -72.86(17) . . . . ?
Sm1 Si1 Si4 C21 22.82(17) . . . . ?
Si5 Si1 Si4 C19 57.33(17) . . . . ?
Si2 Si1 Si4 C19 170.44(16) . . . . ?
Sm1 Si1 Si4 C19 -93.88(16) . . . . ?
Si5 Si1 Si4 C20 -65.34(16) . . . . ?
Si2 Si1 Si4 C20 47.77(16) . . . . ?
Sm1 Si1 Si4 C20 143.45(15) . . . . ?
Si4 Si1 Si5 C23 -73.15(19) . . . . ?
Si2 Si1 Si5 C23 175.78(18) . . . . ?
Sm1 Si1 Si5 C23 71.14(19) . . . . ?
Si4 Si1 Si5 C24 46.81(16) . . . . ?
Si2 Si1 Si5 C24 -64.26(17) . . . . ?
Sm1 Si1 Si5 C24 -168.90(15) . . . . ?
Si4 Si1 Si5 C22 170.58(17) . . . . ?
Si2 Si1 Si5 C22 59.52(18) . . . . ?
Sm1 Si1 Si5 C22 -45.12(18) . . . . ?
Si7 Si3 Si6 C26 -57.60(16) . . . . ?
Si2 Si3 Si6 C26 -167.87(15) . . . . ?
Sm1 Si3 Si6 C26 84.40(17) . . . . ?
Si7 Si3 Si6 C25 63.31(15) . . . . ?
Si2 Si3 Si6 C25 -46.96(15) . . . . ?
Sm1 Si3 Si6 C25 -154.69(15) . . . . ?
Si7 Si3 Si6 C27 -173.47(15) . . . . ?
Si2 Si3 Si6 C27 76.26(15) . . . . ?
Sm1 Si3 Si6 C27 -31.47(17) . . . . ?
Si6 Si3 Si7 C30 -175.3(2) . . . . ?
Si2 Si3 Si7 C30 -64.8(2) . . . . ?
Sm1 Si3 Si7 C30 27.8(2) . . . . ?
Si6 Si3 Si7 C28 -52.9(2) . . . . ?
Si2 Si3 Si7 C28 57.6(2) . . . . ?
Sm1 Si3 Si7 C28 150.2(2) . . . . ?
Si6 Si3 Si7 C29 67.7(2) . . . . ?
Si2 Si3 Si7 C29 178.1(2) . . . . ?
Sm1 Si3 Si7 C29 -89.2(2) . . . . ?
O2 Sm1 O1 C1 71.6(3) . . . . ?
O4 Sm1 O1 C1 -127.8(3) . . . . ?
O3 Sm1 O1 C1 153.1(3) . . . . ?
Si3 Sm1 O1 C1 27.3(5) . . . . ?
Si1 Sm1 O1 C1 -33.1(3) . . . . ?
O2 Sm1 O1 C4 -135.5(3) . . . . ?
O4 Sm1 O1 C4 25.1(3) . . . . ?
O3 Sm1 O1 C4 -54.0(3) . . . . ?
Si3 Sm1 O1 C4 -179.7(3) . . . . ?
Si1 Sm1 O1 C4 119.9(3) . . . . ?
O4 Sm1 O2 C8 20.6(4) . . . . ?
O1 Sm1 O2 C8 56.8(3) . . . . ?
O3 Sm1 O2 C8 -38.5(3) . . . . ?
Si3 Sm1 O2 C8 -132.4(3) . . . . ?
Si1 Sm1 O2 C8 152.0(3) . . . . ?
O4 Sm1 O2 C5 167.9(2) . . . . ?
O1 Sm1 O2 C5 -155.9(3) . . . . ?
O3 Sm1 O2 C5 108.9(3) . . . . ?
Si3 Sm1 O2 C5 15.0(3) . . . . ?
Si1 Sm1 O2 C5 -60.6(3) . . . . ?
O2 Sm1 O3 C12 93.2(3) . . . . ?
O4 Sm1 O3 C12 -58.2(3) . . . . ?
O1 Sm1 O3 C12 18.9(3) . . . . ?
Si3 Sm1 O3 C12 -171.8(3) . . . . ?
Si1 Sm1 O3 C12 -134.4(3) . . . . ?
O2 Sm1 O3 C9 -91.1(3) . . . . ?
O4 Sm1 O3 C9 117.5(3) . . . . ?
O1 Sm1 O3 C9 -165.4(3) . . . . ?
Si3 Sm1 O3 C9 3.9(3) . . . . ?
Si1 Sm1 O3 C9 41.3(4) . . . . ?
O2 Sm1 O4 C13 -74.1(3) . . . . ?
O1 Sm1 O4 C13 -109.8(3) . . . . ?
O3 Sm1 O4 C13 -14.4(3) . . . . ?
Si3 Sm1 O4 C13 76.2(3) . . . . ?
Si1 Sm1 O4 C13 152.3(3) . . . . ?
O2 Sm1 O4 C16 114.4(3) . . . . ?
O1 Sm1 O4 C16 78.7(3) . . . . ?
O3 Sm1 O4 C16 174.1(3) . . . . ?
Si3 Sm1 O4 C16 -95.3(3) . . . . ?
Si1 Sm1 O4 C16 -19.2(3) . . . . ?
C4 O1 C1 C2 -30.3(4) . . . . ?
Sm1 O1 C1 C2 128.0(3) . . . . ?
O1 C1 C2 C3 38.5(4) . . . . ?
C1 C2 C3 C4 -32.5(4) . . . . ?
C1 O1 C4 C3 9.4(4) . . . . ?
Sm1 O1 C4 C3 -145.2(3) . . . . ?
C2 C3 C4 O1 15.1(4) . . . . ?
C8 O2 C5 C6 20.5(4) . . . . ?
Sm1 O2 C5 C6 -130.8(3) . . . . ?
O2 C5 C6 C7 -36.3(4) . . . . ?
C5 C6 C7 C8 38.0(4) . . . . ?
C5 O2 C8 C7 3.9(4) . . . . ?
Sm1 O2 C8 C7 154.6(2) . . . . ?
C6 C7 C8 O2 -26.5(4) . . . . ?
C12 O3 C9 C10 42.1(4) . . . . ?
Sm1 O3 C9 C10 -134.6(3) . . . . ?
O3 C9 C10 C11 -33.9(4) . . . . ?
C9 C10 C11 C12 13.6(5) . . . . ?
C9 O3 C12 C11 -33.2(4) . . . . ?
Sm1 O3 C12 C11 142.9(3) . . . . ?
C10 C11 C12 O3 11.2(5) . . . . ?
C16 O4 C13 C14 13.9(4) . . . . ?
Sm1 O4 C13 C14 -158.3(2) . . . . ?
O4 C13 C14 C15 -32.3(4) . . . . ?
C13 C14 C15 C16 37.8(4) . . . . ?
C13 O4 C16 C15 10.3(5) . . . . ?
Sm1 O4 C16 C15 -176.5(3) . . . . ?
C14 C15 C16 O4 -30.3(5) . . . . ?
 
_diffrn_measured_fraction_theta_max    0.997
_diffrn_reflns_theta_full              26.43
_diffrn_measured_fraction_theta_full   0.997
_refine_diff_density_max    2.530
_refine_diff_density_min   -0.868
_refine_diff_density_rms    0.124


# SQUEEZE RESULTS (APPEND TO CIF)
# Note: Data are Listed for all Voids in the P1 Unit Cell
# i.e. Centre of Gravity, Solvent Accessible Volume,
# Recovered number of Electrons in the Void and
# Details about the Squeezed Material
loop_
  _platon_squeeze_void_nr
  _platon_squeeze_void_average_x
  _platon_squeeze_void_average_y
  _platon_squeeze_void_average_z
  _platon_squeeze_void_volume
  _platon_squeeze_void_count_electrons
  _platon_squeeze_void_content
   1  0.000  0.000  0.000        35         1 ' '
   2  0.000  0.500  0.500        35         1 ' '
   3  0.207  0.231  0.522        15         0 ' '
   4  0.207  0.269  0.022        15         0 ' '
   5  0.251  0.040  0.541        26         0 ' '
   6  0.251  0.460  0.041        26         0 ' '
   7  0.282  0.207  0.754        43         1 ' '
   8  0.282  0.293  0.254        43         1 ' '
   9  0.386  0.209  0.972        16         0 ' '
  10  0.386  0.291  0.472        16         0 ' '
  11  0.450  0.518  0.472         7         0 ' '
  12  0.450  0.981  0.972         7         0 ' '
  13  0.557  0.021  0.032         7         0 ' '
  14  0.557  0.479  0.532         6         0 ' '
  15  0.718  0.707  0.746        43         1 ' '
  16  0.718  0.793  0.246        43         1 ' '
  17  0.621  0.712  0.526        17         0 ' '
  18  0.621  0.788  0.026        17         0 ' '
  19  0.749  0.540  0.959        26         0 ' '
  20  0.749  0.960  0.459        26         0 ' '
  21  0.802  0.729  0.977        14         0 ' '
  22  0.802  0.771  0.477        14         0 ' '
_platon_squeeze_details
;
;
#===END
data_3_1091
 
_audit_creation_method            SHELXL-97
_chemical_name_systematic
;
 ?
;
_chemical_name_common             ?
_chemical_melting_point           ?
_chemical_formula_moiety          ?
_chemical_formula_sum
 'C30 H74 O4 Si7 Yb'
_chemical_formula_weight          868.56
 
loop_
 _atom_type_symbol
 _atom_type_description
 _atom_type_scat_dispersion_real
 _atom_type_scat_dispersion_imag
 _atom_type_scat_source
 'C'  'C'   0.0033   0.0016
 'International Tables Vol C Tables 4.2.6.8 and 6.1.1.4'
 'H'  'H'   0.0000   0.0000
 'International Tables Vol C Tables 4.2.6.8 and 6.1.1.4'
 'O'  'O'   0.0106   0.0060
 'International Tables Vol C Tables 4.2.6.8 and 6.1.1.4'
 'Si'  'Si'   0.0817   0.0704
 'International Tables Vol C Tables 4.2.6.8 and 6.1.1.4'
 'Yb'  'Yb'  -0.3850   5.5486
 'International Tables Vol C Tables 4.2.6.8 and 6.1.1.4'
 
_symmetry_cell_setting            orthorhombic
_symmetry_space_group_name_H-M    Pna2(1)
 
loop_
 _symmetry_equiv_pos_as_xyz
 'x, y, z'
 '-x, -y, z+1/2'
 'x+1/2, -y+1/2, z'
 '-x+1/2, y+1/2, z+1/2'
 
_cell_length_a                    22.675(5)
_cell_length_b                    11.418(2)
_cell_length_c                    17.749(4)
_cell_angle_alpha                 90.00
_cell_angle_beta                  90.00
_cell_angle_gamma                 90.00
_cell_volume                      4595.2(16)
_cell_formula_units_Z             4
_cell_measurement_temperature     200(2)
_cell_measurement_reflns_used     13913
_cell_measurement_theta_min       4.585
_cell_measurement_theta_max       52.383
 
_exptl_crystal_description        blocks
_exptl_crystal_colour             yellow
_exptl_crystal_size_max           0.34
_exptl_crystal_size_mid           0.17
_exptl_crystal_size_min           0.13
_exptl_crystal_density_meas       ?
_exptl_crystal_density_diffrn     1.255
_exptl_crystal_density_method     'not measured'
_exptl_crystal_F_000              1816
_exptl_absorpt_coefficient_mu     2.245
_exptl_absorpt_correction_type    multi-scan
_exptl_absorpt_correction_T_min   0.5157
_exptl_absorpt_correction_T_max   0.7590
_exptl_absorpt_process_details    SADABS
 
_exptl_special_details
;
 ?
;
 
_diffrn_ambient_temperature       200(2)
_diffrn_radiation_wavelength      0.71073
_diffrn_radiation_type            MoK\a
_diffrn_radiation_source          'fine-focus sealed tube'
_diffrn_radiation_monochromator   graphite
_diffrn_measurement_device_type   'SMART APEX''
_diffrn_measurement_method        '\w scans'
_diffrn_detector_area_resol_mean  ?
_diffrn_standards_number          ?
_diffrn_standards_interval_count  ?
_diffrn_standards_interval_time   ?
_diffrn_standards_decay_%         ?
_diffrn_reflns_number             35364
_diffrn_reflns_av_R_equivalents   0.0416
_diffrn_reflns_av_sigmaI/netI     0.0497
_diffrn_reflns_limit_h_min        -28
_diffrn_reflns_limit_h_max        28
_diffrn_reflns_limit_k_min        -14
_diffrn_reflns_limit_k_max        14
_diffrn_reflns_limit_l_min        -22
_diffrn_reflns_limit_l_max        21
_diffrn_reflns_theta_min          1.80
_diffrn_reflns_theta_max          26.37
_reflns_number_total              9359
_reflns_number_gt                 8495
_reflns_threshold_expression      >2sigma(I)
 
_computing_data_collection        'Bruker XSCANS' 
_computing_cell_refinement        'Bruker XSCANS' 
_computing_data_reduction         'Bruker SHELXTL' 
_computing_structure_solution     'SHELXS-97 (Sheldrick, 1990)' 
_computing_structure_refinement   'SHELXL-97 (Sheldrick, 1997)' 
_computing_molecular_graphics     'Bruker SHELXTL' 
_computing_publication_material   'Bruker SHELXTL'
 
_refine_special_details
;
 Refinement of F^2^ against ALL reflections.  The weighted R-factor wR and
 goodness of fit S are based on F^2^, conventional R-factors R are based
 on F, with F set to zero for negative F^2^. The threshold expression of
 F^2^ > 2sigma(F^2^) is used only for calculating R-factors(gt) etc. and is
 not relevant to the choice of reflections for refinement.  R-factors based
 on F^2^ are statistically about twice as large as those based on F, and R-
 factors based on ALL data will be even larger.
;
 
_refine_ls_structure_factor_coef  Fsqd
_refine_ls_matrix_type            full
_refine_ls_weighting_scheme       calc
_refine_ls_weighting_details
 'calc w=1/[\s^2^(Fo^2^)+(0.0352P)^2^+0.0000P] where P=(Fo^2^+2Fc^2^)/3'
_atom_sites_solution_primary      direct
_atom_sites_solution_secondary    difmap
_atom_sites_solution_hydrogens    geom
_refine_ls_hydrogen_treatment     constr
_refine_ls_extinction_method      none
_refine_ls_extinction_coef        ?
_refine_ls_abs_structure_details
 'Flack H D (1983), Acta Cryst. A39, 876-881'
_refine_ls_abs_structure_Flack    0.011(7)
_refine_ls_number_reflns          9359
_refine_ls_number_parameters      394
_refine_ls_number_restraints      1
_refine_ls_R_factor_all           0.0421
_refine_ls_R_factor_gt            0.0368
_refine_ls_wR_factor_ref          0.0776
_refine_ls_wR_factor_gt           0.0756
_refine_ls_goodness_of_fit_ref    1.033
_refine_ls_restrained_S_all       1.033
_refine_ls_shift/su_max           0.004
_refine_ls_shift/su_mean          0.000
 
loop_
 _atom_site_label
 _atom_site_type_symbol
 _atom_site_fract_x
 _atom_site_fract_y
 _atom_site_fract_z
 _atom_site_U_iso_or_equiv
 _atom_site_adp_type
 _atom_site_occupancy
 _atom_site_symmetry_multiplicity
 _atom_site_calc_flag
 _atom_site_refinement_flags
 _atom_site_disorder_assembly
 _atom_site_disorder_group
Yb1 Yb 0.656146(7) 0.200290(13) 0.612575(18) 0.02987(6) Uani 1 1 d . . .
Si1 Si 0.75049(5) 0.05440(11) 0.69322(8) 0.0345(3) Uani 1 1 d . . .
Si2 Si 0.68013(6) -0.09859(11) 0.70563(8) 0.0375(3) Uani 1 1 d . . .
Si3 Si 0.58903(5) -0.01678(11) 0.66564(7) 0.0333(3) Uani 1 1 d . . .
Si4 Si 0.77498(7) 0.12757(13) 0.81201(9) 0.0469(4) Uani 1 1 d . . .
Si5 Si 0.84006(6) -0.03499(16) 0.66202(11) 0.0452(4) Uani 1 1 d . . .
Si6 Si 0.52567(7) -0.01702(19) 0.76890(9) 0.0618(5) Uani 1 1 d . . .
Si7 Si 0.54204(6) -0.15384(14) 0.58834(8) 0.0478(4) Uani 1 1 d . . .
O1 O 0.62089(15) 0.3482(3) 0.7046(2) 0.0495(9) Uani 1 1 d . . .
O2 O 0.57331(16) 0.2867(3) 0.5420(2) 0.0445(9) Uani 1 1 d . . .
O3 O 0.67670(16) 0.1268(3) 0.48638(19) 0.0451(8) Uani 1 1 d . . .
O4 O 0.72812(17) 0.3512(3) 0.5697(2) 0.0578(10) Uani 1 1 d . . .
C1 C 0.7022(3) -0.2218(4) 0.6391(4) 0.065(2) Uani 1 1 d . . .
H1A H 0.7422 -0.2482 0.6512 0.097 Uiso 1 1 calc R . .
H1B H 0.7011 -0.1933 0.5870 0.097 Uiso 1 1 calc R . .
H1C H 0.6746 -0.2873 0.6447 0.097 Uiso 1 1 calc R . .
C2 C 0.6790(3) -0.1718(6) 0.8021(4) 0.0676(18) Uani 1 1 d . . .
H2A H 0.6491 -0.2337 0.8026 0.101 Uiso 1 1 calc R . .
H2B H 0.6695 -0.1134 0.8408 0.101 Uiso 1 1 calc R . .
H2C H 0.7178 -0.2059 0.8127 0.101 Uiso 1 1 calc R . .
C30 C 0.5387(3) -0.3085(5) 0.6222(9) 0.098(3) Uani 1 1 d . . .
H30A H 0.5095 -0.3520 0.5927 0.147 Uiso 1 1 calc R . .
H30B H 0.5275 -0.3097 0.6755 0.147 Uiso 1 1 calc R . .
H30C H 0.5775 -0.3452 0.6162 0.147 Uiso 1 1 calc R . .
C3 C 0.7098(4) 0.1637(7) 0.8727(5) 0.093(3) Uani 1 1 d . . .
H3A H 0.7229 0.2096 0.9163 0.139 Uiso 1 1 calc R . .
H3B H 0.6912 0.0911 0.8900 0.139 Uiso 1 1 calc R . .
H3C H 0.6813 0.2094 0.8434 0.139 Uiso 1 1 calc R . .
C4 C 0.8165(3) 0.2696(5) 0.8005(4) 0.0647(17) Uani 1 1 d . . .
H4A H 0.7907 0.3279 0.7769 0.097 Uiso 1 1 calc R . .
H4B H 0.8512 0.2566 0.7687 0.097 Uiso 1 1 calc R . .
H4C H 0.8291 0.2980 0.8501 0.097 Uiso 1 1 calc R . .
C5 C 0.8238(3) 0.0360(7) 0.8743(4) 0.082(2) Uani 1 1 d . . .
H5A H 0.8618 0.0233 0.8493 0.123 Uiso 1 1 calc R . .
H5B H 0.8049 -0.0396 0.8839 0.123 Uiso 1 1 calc R . .
H5C H 0.8302 0.0768 0.9222 0.123 Uiso 1 1 calc R . .
C6 C 0.9039(2) 0.0676(6) 0.6782(4) 0.0687(18) Uani 1 1 d . . .
H6A H 0.9083 0.0823 0.7323 0.103 Uiso 1 1 calc R . .
H6B H 0.8965 0.1418 0.6520 0.103 Uiso 1 1 calc R . .
H6C H 0.9402 0.0321 0.6586 0.103 Uiso 1 1 calc R . .
C7 C 0.8579(3) -0.1732(6) 0.7160(4) 0.0671(18) Uani 1 1 d . . .
H7A H 0.8953 -0.2056 0.6978 0.101 Uiso 1 1 calc R . .
H7B H 0.8264 -0.2306 0.7085 0.101 Uiso 1 1 calc R . .
H7C H 0.8613 -0.1549 0.7698 0.101 Uiso 1 1 calc R . .
C8 C 0.8483(3) -0.0779(7) 0.5600(4) 0.069(2) Uani 1 1 d . . .
H8A H 0.8860 -0.1186 0.5530 0.103 Uiso 1 1 calc R . .
H8B H 0.8475 -0.0074 0.5285 0.103 Uiso 1 1 calc R . .
H8C H 0.8159 -0.1299 0.5456 0.103 Uiso 1 1 calc R . .
C9 C 0.5578(4) 0.0555(10) 0.8545(5) 0.133(4) Uani 1 1 d . . .
H9A H 0.5265 0.0690 0.8917 0.199 Uiso 1 1 calc R . .
H9B H 0.5754 0.1306 0.8402 0.199 Uiso 1 1 calc R . .
H9C H 0.5881 0.0048 0.8765 0.199 Uiso 1 1 calc R . .
C10 C 0.5010(4) -0.1630(8) 0.8039(5) 0.110(3) Uani 1 1 d . . .
H10A H 0.4786 -0.1530 0.8506 0.165 Uiso 1 1 calc R . .
H10B H 0.5355 -0.2124 0.8136 0.165 Uiso 1 1 calc R . .
H10C H 0.4760 -0.2004 0.7658 0.165 Uiso 1 1 calc R . .
C11 C 0.4553(3) 0.0637(8) 0.7481(5) 0.094(3) Uani 1 1 d . . .
H11A H 0.4316 0.0182 0.7124 0.141 Uiso 1 1 calc R . .
H11B H 0.4646 0.1402 0.7261 0.141 Uiso 1 1 calc R . .
H11C H 0.4331 0.0747 0.7949 0.141 Uiso 1 1 calc R . .
C12 C 0.4625(2) -0.1114(6) 0.5711(4) 0.0639(17) Uani 1 1 d . . .
H12A H 0.4456 -0.1624 0.5322 0.096 Uiso 1 1 calc R . .
H12B H 0.4606 -0.0298 0.5541 0.096 Uiso 1 1 calc R . .
H12C H 0.4400 -0.1200 0.6179 0.096 Uiso 1 1 calc R . .
C13 C 0.5766(3) -0.1643(8) 0.4918(4) 0.091(2) Uani 1 1 d . . .
H13A H 0.6148 -0.2040 0.4956 0.137 Uiso 1 1 calc R . .
H13B H 0.5823 -0.0854 0.4714 0.137 Uiso 1 1 calc R . .
H13C H 0.5506 -0.2090 0.4584 0.137 Uiso 1 1 calc R . .
C14 C 0.6482(3) 0.4275(7) 0.7546(4) 0.073(2) Uani 1 1 d . . .
H14A H 0.6573 0.5019 0.7283 0.088 Uiso 1 1 calc R . .
H14B H 0.6856 0.3940 0.7739 0.088 Uiso 1 1 calc R . .
C15 C 0.6069(3) 0.4487(8) 0.8171(5) 0.099(3) Uani 1 1 d . . .
H15A H 0.6180 0.4008 0.8613 0.119 Uiso 1 1 calc R . .
H15B H 0.6078 0.5323 0.8319 0.119 Uiso 1 1 calc R . .
C16 C 0.5496(4) 0.4174(9) 0.7916(5) 0.103(3) Uani 1 1 d . . .
H16A H 0.5247 0.4879 0.7848 0.124 Uiso 1 1 calc R . .
H16B H 0.5301 0.3644 0.8280 0.124 Uiso 1 1 calc R . .
C17 C 0.5594(3) 0.3562(8) 0.7171(5) 0.087(3) Uani 1 1 d . . .
H17A H 0.5417 0.2770 0.7183 0.105 Uiso 1 1 calc R . .
H17B H 0.5406 0.4011 0.6759 0.105 Uiso 1 1 calc R . .
C18 C 0.5173(3) 0.2340(6) 0.5261(4) 0.0629(16) Uani 1 1 d . . .
H18A H 0.4988 0.2053 0.5732 0.076 Uiso 1 1 calc R . .
H18B H 0.5222 0.1670 0.4913 0.076 Uiso 1 1 calc R . .
C19 C 0.4797(4) 0.3278(9) 0.4904(5) 0.103(3) Uani 1 1 d . . .
H19A H 0.4535 0.2946 0.4513 0.124 Uiso 1 1 calc R . .
H19B H 0.4554 0.3687 0.5286 0.124 Uiso 1 1 calc R . .
C20 C 0.5237(4) 0.4071(7) 0.4572(5) 0.100(3) Uani 1 1 d . . .
H20A H 0.5079 0.4877 0.4534 0.120 Uiso 1 1 calc R . .
H20B H 0.5354 0.3800 0.4064 0.120 Uiso 1 1 calc R . .
C21 C 0.5743(4) 0.4025(6) 0.5099(4) 0.077(2) Uani 1 1 d . . .
H21A H 0.6118 0.4163 0.4827 0.093 Uiso 1 1 calc R . .
H21B H 0.5701 0.4626 0.5498 0.093 Uiso 1 1 calc R . .
C22 C 0.6631(3) 0.1703(6) 0.4129(3) 0.0592(16) Uani 1 1 d . . .
H22A H 0.6771 0.2521 0.4076 0.071 Uiso 1 1 calc R . .
H22B H 0.6200 0.1689 0.4044 0.071 Uiso 1 1 calc R . .
C23 C 0.6934(3) 0.0935(5) 0.3573(3) 0.0616(16) Uani 1 1 d . . .
H23A H 0.7093 0.1397 0.3147 0.074 Uiso 1 1 calc R . .
H23B H 0.6662 0.0331 0.3374 0.074 Uiso 1 1 calc R . .
C24 C 0.7424(3) 0.0389(5) 0.4028(3) 0.0602(16) Uani 1 1 d . . .
H24A H 0.7544 -0.0378 0.3817 0.072 Uiso 1 1 calc R . .
H24B H 0.7773 0.0909 0.4055 0.072 Uiso 1 1 calc R . .
C25 C 0.7138(3) 0.0252(5) 0.4782(3) 0.0573(15) Uani 1 1 d . . .
H25A H 0.6901 -0.0475 0.4801 0.069 Uiso 1 1 calc R . .
H25B H 0.7438 0.0225 0.5186 0.069 Uiso 1 1 calc R . .
C26 C 0.7350(3) 0.4715(5) 0.5816(4) 0.077(2) Uani 1 1 d . . .
H26A H 0.7119 0.4959 0.6263 0.093 Uiso 1 1 calc R . .
H26B H 0.7200 0.5153 0.5374 0.093 Uiso 1 1 calc R . .
C27 C 0.7954(3) 0.4973(7) 0.5929(7) 0.115(4) Uani 1 1 d . . .
H27A H 0.8032 0.5137 0.6468 0.138 Uiso 1 1 calc R . .
H27B H 0.8071 0.5664 0.5628 0.138 Uiso 1 1 calc R . .
C28 C 0.8284(3) 0.3917(7) 0.5680(6) 0.098(3) Uani 1 1 d . . .
H28A H 0.8570 0.4123 0.5281 0.118 Uiso 1 1 calc R . .
H28B H 0.8500 0.3564 0.6108 0.118 Uiso 1 1 calc R . .
C29 C 0.7839(3) 0.3104(5) 0.5391(4) 0.0659(18) Uani 1 1 d . . .
H29A H 0.7831 0.3117 0.4833 0.079 Uiso 1 1 calc R . .
H29B H 0.7923 0.2295 0.5561 0.079 Uiso 1 1 calc R . .
 
loop_
 _atom_site_aniso_label
 _atom_site_aniso_U_11
 _atom_site_aniso_U_22
 _atom_site_aniso_U_33
 _atom_site_aniso_U_23
 _atom_site_aniso_U_13
 _atom_site_aniso_U_12
Yb1 0.02889(9) 0.02862(9) 0.03209(9) 0.00192(13) 0.00052(13) 0.00220(7)
Si1 0.0255(6) 0.0368(7) 0.0414(7) 0.0076(6) -0.0040(5) 0.0016(5)
Si2 0.0297(7) 0.0317(7) 0.0512(8) 0.0077(6) -0.0006(6) 0.0019(6)
Si3 0.0244(6) 0.0328(6) 0.0428(7) 0.0049(6) 0.0021(5) 0.0002(5)
Si4 0.0478(9) 0.0478(9) 0.0451(8) 0.0025(7) -0.0044(7) -0.0011(7)
Si5 0.0251(8) 0.0546(11) 0.0558(10) 0.0093(8) 0.0012(6) 0.0062(6)
Si6 0.0315(8) 0.1047(15) 0.0493(9) -0.0069(9) 0.0097(7) -0.0014(9)
Si7 0.0342(7) 0.0515(8) 0.0579(10) -0.0072(7) -0.0043(6) -0.0045(6)
O1 0.039(2) 0.053(2) 0.056(2) -0.0179(19) -0.0006(17) 0.0086(17)
O2 0.042(2) 0.045(2) 0.046(2) 0.0041(16) -0.0065(17) 0.0063(16)
O3 0.053(2) 0.046(2) 0.0360(19) -0.0013(16) 0.0024(16) 0.0110(17)
O4 0.054(2) 0.041(2) 0.079(3) 0.007(2) 0.010(2) -0.0072(18)
C1 0.048(3) 0.039(3) 0.108(6) -0.014(3) 0.001(3) 0.009(2)
C2 0.058(4) 0.074(4) 0.071(4) 0.035(4) -0.012(3) 0.000(3)
C30 0.074(4) 0.044(3) 0.176(10) -0.006(5) -0.005(7) -0.006(3)
C3 0.108(6) 0.080(5) 0.091(6) -0.014(4) 0.047(5) -0.013(5)
C4 0.066(4) 0.056(4) 0.072(4) -0.007(3) -0.011(4) -0.014(3)
C5 0.098(5) 0.092(5) 0.056(4) 0.012(4) -0.031(4) 0.008(4)
C6 0.030(3) 0.086(4) 0.090(5) 0.001(4) 0.009(3) -0.010(3)
C7 0.054(4) 0.063(4) 0.085(5) 0.015(4) 0.001(3) 0.020(3)
C8 0.056(4) 0.090(6) 0.060(4) -0.010(4) 0.008(3) 0.020(3)
C9 0.068(5) 0.244(13) 0.085(6) -0.073(8) 0.006(4) 0.010(7)
C10 0.071(5) 0.175(9) 0.083(6) 0.060(6) 0.007(4) -0.033(5)
C11 0.039(4) 0.137(7) 0.107(6) -0.014(5) 0.022(4) 0.013(4)
C12 0.040(3) 0.080(4) 0.072(4) 0.000(3) -0.012(3) -0.011(3)
C13 0.063(5) 0.145(7) 0.065(5) -0.035(5) -0.002(4) -0.004(4)
C14 0.072(5) 0.084(5) 0.063(4) -0.029(4) -0.004(3) -0.013(4)
C15 0.085(6) 0.128(7) 0.086(6) -0.059(5) -0.001(5) 0.000(5)
C16 0.078(6) 0.151(8) 0.080(6) -0.057(6) 0.006(4) 0.013(6)
C17 0.049(4) 0.131(7) 0.082(6) -0.049(5) 0.004(4) 0.020(4)
C18 0.043(3) 0.085(5) 0.061(4) 0.002(3) -0.013(3) -0.005(3)
C19 0.069(5) 0.171(9) 0.069(5) -0.014(5) -0.017(4) 0.054(6)
C20 0.132(8) 0.071(5) 0.097(6) 0.014(5) -0.050(6) 0.027(5)
C21 0.103(6) 0.061(4) 0.067(5) 0.016(3) -0.010(4) 0.018(4)
C22 0.078(5) 0.058(4) 0.041(3) 0.002(3) -0.009(3) 0.018(3)
C23 0.088(5) 0.054(4) 0.042(3) -0.006(3) 0.002(3) 0.003(3)
C24 0.063(4) 0.066(4) 0.051(3) -0.017(3) 0.009(3) 0.011(3)
C25 0.068(4) 0.056(4) 0.048(3) -0.003(3) -0.001(3) 0.022(3)
C26 0.083(5) 0.037(3) 0.112(6) 0.003(3) 0.014(4) -0.015(3)
C27 0.083(5) 0.077(5) 0.186(11) -0.029(6) -0.008(7) -0.020(4)
C28 0.061(4) 0.097(6) 0.137(8) -0.018(6) -0.020(5) -0.016(4)
C29 0.061(4) 0.061(4) 0.076(5) 0.004(3) 0.026(3) -0.015(3)
 
_geom_special_details
;
 All esds (except the esd in the dihedral angle between two l.s. planes)
 are estimated using the full covariance matrix.  The cell esds are taken
 into account individually in the estimation of esds in distances, angles
 and torsion angles; correlations between esds in cell parameters are only
 used when they are defined by crystal symmetry.  An approximate (isotropic)
 treatment of cell esds is used for estimating esds involving l.s. planes.
;
 
loop_
 _geom_bond_atom_site_label_1
 _geom_bond_atom_site_label_2
 _geom_bond_distance
 _geom_bond_site_symmetry_2
 _geom_bond_publ_flag
Yb1 O3 2.437(3) . ?
Yb1 O2 2.464(4) . ?
Yb1 O1 2.482(3) . ?
Yb1 O4 2.492(4) . ?
Yb1 Si3 3.0571(13) . ?
Yb1 Si1 3.0658(13) . ?
Si1 Si4 2.335(2) . ?
Si1 Si5 2.340(2) . ?
Si1 Si2 2.3759(19) . ?
Si2 C1 1.904(6) . ?
Si2 C2 1.906(6) . ?
Si2 Si3 2.3756(18) . ?
Si3 Si6 2.329(2) . ?
Si3 Si7 2.3381(19) . ?
Si4 C3 1.874(7) . ?
Si4 C5 1.882(6) . ?
Si4 C4 1.886(6) . ?
Si5 C8 1.884(7) . ?
Si5 C6 1.885(6) . ?
Si5 C7 1.890(6) . ?
Si6 C10 1.865(8) . ?
Si6 C9 1.878(8) . ?
Si6 C11 1.879(7) . ?
Si7 C13 1.887(7) . ?
Si7 C30 1.867(7) . ?
Si7 C12 1.893(5) . ?
O1 C14 1.411(7) . ?
O1 C17 1.415(7) . ?
O2 C18 1.433(7) . ?
O2 C21 1.439(7) . ?
O3 C22 1.430(7) . ?
O3 C25 1.440(6) . ?
O4 C26 1.398(6) . ?
O4 C29 1.454(7) . ?
C14 C15 1.473(9) . ?
C15 C16 1.422(10) . ?
C16 C17 1.512(10) . ?
C18 C19 1.510(10) . ?
C19 C20 1.470(12) . ?
C20 C21 1.481(10) . ?
C22 C23 1.488(8) . ?
C23 C24 1.509(8) . ?
C24 C25 1.495(8) . ?
C26 C27 1.415(8) . ?
C27 C28 1.486(10) . ?
C28 C29 1.464(9) . ?
 
loop_
 _geom_angle_atom_site_label_1
 _geom_angle_atom_site_label_2
 _geom_angle_atom_site_label_3
 _geom_angle
 _geom_angle_site_symmetry_1
 _geom_angle_site_symmetry_3
 _geom_angle_publ_flag
O3 Yb1 O2 79.42(12) . . ?
O3 Yb1 O1 154.28(12) . . ?
O2 Yb1 O1 79.43(12) . . ?
O3 Yb1 O4 80.36(13) . . ?
O2 Yb1 O4 93.84(13) . . ?
O1 Yb1 O4 86.62(13) . . ?
O3 Yb1 Si3 95.69(9) . . ?
O2 Yb1 Si3 95.85(8) . . ?
O1 Yb1 Si3 100.87(9) . . ?
O4 Yb1 Si3 168.68(9) . . ?
O3 Yb1 Si1 96.23(8) . . ?
O2 Yb1 Si1 170.70(8) . . ?
O1 Yb1 Si1 106.69(9) . . ?
O4 Yb1 Si1 93.51(10) . . ?
Si3 Yb1 Si1 76.29(4) . . ?
Si4 Si1 Si5 99.40(8) . . ?
Si4 Si1 Si2 109.82(8) . . ?
Si5 Si1 Si2 106.50(8) . . ?
Si4 Si1 Yb1 113.15(6) . . ?
Si5 Si1 Yb1 137.07(7) . . ?
Si2 Si1 Yb1 88.53(5) . . ?
C1 Si2 C2 103.7(3) . . ?
C1 Si2 Si3 109.5(2) . . ?
C2 Si2 Si3 115.4(2) . . ?
C1 Si2 Si1 108.0(2) . . ?
C2 Si2 Si1 114.5(2) . . ?
Si3 Si2 Si1 105.49(7) . . ?
Si6 Si3 Si7 100.37(8) . . ?
Si6 Si3 Si2 107.51(8) . . ?
Si7 Si3 Si2 107.96(7) . . ?
Si6 Si3 Yb1 123.40(7) . . ?
Si7 Si3 Yb1 126.06(6) . . ?
Si2 Si3 Yb1 88.74(5) . . ?
C3 Si4 C5 104.4(4) . . ?
C3 Si4 C4 105.4(3) . . ?
C5 Si4 C4 104.3(3) . . ?
C3 Si4 Si1 114.2(3) . . ?
C5 Si4 Si1 118.1(2) . . ?
C4 Si4 Si1 109.2(2) . . ?
C8 Si5 C6 103.4(3) . . ?
C8 Si5 C7 104.4(4) . . ?
C6 Si5 C7 106.1(3) . . ?
C8 Si5 Si1 115.29(19) . . ?
C6 Si5 Si1 111.1(2) . . ?
C7 Si5 Si1 115.5(2) . . ?
C10 Si6 C9 103.9(5) . . ?
C10 Si6 C11 104.4(4) . . ?
C9 Si6 C11 105.8(4) . . ?
C10 Si6 Si3 116.6(3) . . ?
C9 Si6 Si3 113.4(3) . . ?
C11 Si6 Si3 111.6(3) . . ?
C13 Si7 C30 104.4(5) . . ?
C13 Si7 C12 105.3(3) . . ?
C30 Si7 C12 104.8(3) . . ?
C13 Si7 Si3 112.7(2) . . ?
C30 Si7 Si3 117.6(4) . . ?
C12 Si7 Si3 111.0(2) . . ?
C14 O1 C17 107.1(5) . . ?
C14 O1 Yb1 135.1(3) . . ?
C17 O1 Yb1 117.7(4) . . ?
C18 O2 C21 108.8(5) . . ?
C18 O2 Yb1 127.3(3) . . ?
C21 O2 Yb1 123.9(4) . . ?
C22 O3 C25 108.3(4) . . ?
C22 O3 Yb1 132.7(3) . . ?
C25 O3 Yb1 118.8(3) . . ?
C26 O4 C29 106.0(4) . . ?
C26 O4 Yb1 134.9(4) . . ?
C29 O4 Yb1 117.5(3) . . ?
O1 C14 C15 107.4(5) . . ?
C16 C15 C14 107.5(6) . . ?
C15 C16 C17 105.1(7) . . ?
O1 C17 C16 108.2(6) . . ?
O2 C18 C19 106.5(6) . . ?
C20 C19 C18 102.8(6) . . ?
C19 C20 C21 104.6(7) . . ?
O2 C21 C20 105.6(6) . . ?
O3 C22 C23 107.5(5) . . ?
C22 C23 C24 103.2(5) . . ?
C25 C24 C23 101.7(5) . . ?
O3 C25 C24 105.1(4) . . ?
O4 C26 C27 109.4(6) . . ?
C26 C27 C28 106.1(6) . . ?
C29 C28 C27 105.8(6) . . ?
O4 C29 C28 105.3(5) . . ?
 
loop_
 _geom_torsion_atom_site_label_1
 _geom_torsion_atom_site_label_2
 _geom_torsion_atom_site_label_3
 _geom_torsion_atom_site_label_4
 _geom_torsion
 _geom_torsion_site_symmetry_1
 _geom_torsion_site_symmetry_2
 _geom_torsion_site_symmetry_3
 _geom_torsion_site_symmetry_4
 _geom_torsion_publ_flag
O3 Yb1 Si1 Si4 161.16(10) . . . . ?
O2 Yb1 Si1 Si4 -137.3(6) . . . . ?
O1 Yb1 Si1 Si4 -7.04(11) . . . . ?
O4 Yb1 Si1 Si4 80.48(11) . . . . ?
Si3 Yb1 Si1 Si4 -104.49(7) . . . . ?
O3 Yb1 Si1 Si5 25.05(13) . . . . ?
O2 Yb1 Si1 Si5 86.6(6) . . . . ?
O1 Yb1 Si1 Si5 -143.14(13) . . . . ?
O4 Yb1 Si1 Si5 -55.62(14) . . . . ?
Si3 Yb1 Si1 Si5 119.41(11) . . . . ?
O3 Yb1 Si1 Si2 -87.88(10) . . . . ?
O2 Yb1 Si1 Si2 -26.3(6) . . . . ?
O1 Yb1 Si1 Si2 103.93(10) . . . . ?
O4 Yb1 Si1 Si2 -168.55(11) . . . . ?
Si3 Yb1 Si1 Si2 6.48(5) . . . . ?
Si4 Si1 Si2 C1 -137.3(2) . . . . ?
Si5 Si1 Si2 C1 -30.6(2) . . . . ?
Yb1 Si1 Si2 C1 108.6(2) . . . . ?
Si4 Si1 Si2 C2 -22.3(3) . . . . ?
Si5 Si1 Si2 C2 84.4(3) . . . . ?
Yb1 Si1 Si2 C2 -136.4(2) . . . . ?
Si4 Si1 Si2 Si3 105.70(8) . . . . ?
Si5 Si1 Si2 Si3 -147.56(8) . . . . ?
Yb1 Si1 Si2 Si3 -8.42(7) . . . . ?
C1 Si2 Si3 Si6 127.7(2) . . . . ?
C2 Si2 Si3 Si6 11.1(3) . . . . ?
Si1 Si2 Si3 Si6 -116.34(9) . . . . ?
C1 Si2 Si3 Si7 20.2(2) . . . . ?
C2 Si2 Si3 Si7 -96.4(3) . . . . ?
Si1 Si2 Si3 Si7 136.17(8) . . . . ?
C1 Si2 Si3 Yb1 -107.6(2) . . . . ?
C2 Si2 Si3 Yb1 135.9(3) . . . . ?
Si1 Si2 Si3 Yb1 8.45(7) . . . . ?
O3 Yb1 Si3 Si6 -161.20(11) . . . . ?
O2 Yb1 Si3 Si6 -81.30(11) . . . . ?
O1 Yb1 Si3 Si6 -0.97(11) . . . . ?
O4 Yb1 Si3 Si6 129.9(5) . . . . ?
Si1 Yb1 Si3 Si6 103.75(8) . . . . ?
O3 Yb1 Si3 Si7 -22.88(11) . . . . ?
O2 Yb1 Si3 Si7 57.03(11) . . . . ?
O1 Yb1 Si3 Si7 137.36(11) . . . . ?
O4 Yb1 Si3 Si7 -91.8(5) . . . . ?
Si1 Yb1 Si3 Si7 -117.92(8) . . . . ?
O3 Yb1 Si3 Si2 88.56(9) . . . . ?
O2 Yb1 Si3 Si2 168.47(10) . . . . ?
O1 Yb1 Si3 Si2 -111.20(10) . . . . ?
O4 Yb1 Si3 Si2 19.6(5) . . . . ?
Si1 Yb1 Si3 Si2 -6.48(5) . . . . ?
Si5 Si1 Si4 C3 -160.7(3) . . . . ?
Si2 Si1 Si4 C3 -49.3(3) . . . . ?
Yb1 Si1 Si4 C3 47.9(3) . . . . ?
Si5 Si1 Si4 C5 -37.4(3) . . . . ?
Si2 Si1 Si4 C5 74.1(3) . . . . ?
Yb1 Si1 Si4 C5 171.2(3) . . . . ?
Si5 Si1 Si4 C4 81.5(3) . . . . ?
Si2 Si1 Si4 C4 -167.0(2) . . . . ?
Yb1 Si1 Si4 C4 -69.9(3) . . . . ?
Si4 Si1 Si5 C8 -166.3(3) . . . . ?
Si2 Si1 Si5 C8 79.6(3) . . . . ?
Yb1 Si1 Si5 C8 -26.6(3) . . . . ?
Si4 Si1 Si5 C6 -49.2(3) . . . . ?
Si2 Si1 Si5 C6 -163.2(2) . . . . ?
Yb1 Si1 Si5 C6 90.5(3) . . . . ?
Si4 Si1 Si5 C7 71.6(3) . . . . ?
Si2 Si1 Si5 C7 -42.4(3) . . . . ?
Yb1 Si1 Si5 C7 -148.6(3) . . . . ?
Si7 Si3 Si6 C10 45.1(3) . . . . ?
Si2 Si3 Si6 C10 -67.6(3) . . . . ?
Yb1 Si3 Si6 C10 -168.0(3) . . . . ?
Si7 Si3 Si6 C9 165.9(4) . . . . ?
Si2 Si3 Si6 C9 53.1(4) . . . . ?
Yb1 Si3 Si6 C9 -47.3(4) . . . . ?
Si7 Si3 Si6 C11 -74.8(3) . . . . ?
Si2 Si3 Si6 C11 172.5(3) . . . . ?
Yb1 Si3 Si6 C11 72.1(3) . . . . ?
Si6 Si3 Si7 C13 173.1(3) . . . . ?
Si2 Si3 Si7 C13 -74.6(3) . . . . ?
Yb1 Si3 Si7 C13 27.4(3) . . . . ?
Si6 Si3 Si7 C30 -65.5(4) . . . . ?
Si2 Si3 Si7 C30 46.9(4) . . . . ?
Yb1 Si3 Si7 C30 148.9(4) . . . . ?
Si6 Si3 Si7 C12 55.2(2) . . . . ?
Si2 Si3 Si7 C12 167.6(2) . . . . ?
Yb1 Si3 Si7 C12 -90.5(2) . . . . ?
O3 Yb1 O1 C14 -104.4(6) . . . . ?
O2 Yb1 O1 C14 -139.5(6) . . . . ?
O4 Yb1 O1 C14 -45.0(6) . . . . ?
Si3 Yb1 O1 C14 126.5(6) . . . . ?
Si1 Yb1 O1 C14 47.7(6) . . . . ?
O3 Yb1 O1 C17 80.4(6) . . . . ?
O2 Yb1 O1 C17 45.3(5) . . . . ?
O4 Yb1 O1 C17 139.8(5) . . . . ?
Si3 Yb1 O1 C17 -48.7(5) . . . . ?
Si1 Yb1 O1 C17 -127.5(5) . . . . ?
O3 Yb1 O2 C18 86.7(4) . . . . ?
O1 Yb1 O2 C18 -108.0(4) . . . . ?
O4 Yb1 O2 C18 166.2(4) . . . . ?
Si3 Yb1 O2 C18 -8.0(4) . . . . ?
Si1 Yb1 O2 C18 24.0(9) . . . . ?
O3 Yb1 O2 C21 -93.7(5) . . . . ?
O1 Yb1 O2 C21 71.6(5) . . . . ?
O4 Yb1 O2 C21 -14.2(5) . . . . ?
Si3 Yb1 O2 C21 171.6(5) . . . . ?
Si1 Yb1 O2 C21 -156.4(5) . . . . ?
O2 Yb1 O3 C22 27.2(5) . . . . ?
O1 Yb1 O3 C22 -7.9(6) . . . . ?
O4 Yb1 O3 C22 -68.6(5) . . . . ?
Si3 Yb1 O3 C22 122.1(5) . . . . ?
Si1 Yb1 O3 C22 -161.1(5) . . . . ?
O2 Yb1 O3 C25 -159.2(4) . . . . ?
O1 Yb1 O3 C25 165.7(4) . . . . ?
O4 Yb1 O3 C25 105.0(4) . . . . ?
Si3 Yb1 O3 C25 -64.3(4) . . . . ?
Si1 Yb1 O3 C25 12.5(4) . . . . ?
O3 Yb1 O4 C26 145.3(6) . . . . ?
O2 Yb1 O4 C26 66.7(6) . . . . ?
O1 Yb1 O4 C26 -12.5(6) . . . . ?
Si3 Yb1 O4 C26 -144.4(5) . . . . ?
Si1 Yb1 O4 C26 -119.0(6) . . . . ?
O3 Yb1 O4 C29 -51.6(4) . . . . ?
O2 Yb1 O4 C29 -130.1(4) . . . . ?
O1 Yb1 O4 C29 150.7(4) . . . . ?
Si3 Yb1 O4 C29 18.8(8) . . . . ?
Si1 Yb1 O4 C29 44.2(4) . . . . ?
C17 O1 C14 C15 22.4(9) . . . . ?
Yb1 O1 C14 C15 -153.2(5) . . . . ?
O1 C14 C15 C16 -20.4(10) . . . . ?
C14 C15 C16 C17 10.0(11) . . . . ?
C14 O1 C17 C16 -16.1(9) . . . . ?
Yb1 O1 C17 C16 160.4(6) . . . . ?
C15 C16 C17 O1 3.4(11) . . . . ?
C21 O2 C18 C19 -6.8(7) . . . . ?
Yb1 O2 C18 C19 172.8(4) . . . . ?
O2 C18 C19 C20 25.4(8) . . . . ?
C18 C19 C20 C21 -33.9(9) . . . . ?
C18 O2 C21 C20 -14.5(8) . . . . ?
Yb1 O2 C21 C20 165.8(5) . . . . ?
C19 C20 C21 O2 30.6(9) . . . . ?
C25 O3 C22 C23 -0.5(7) . . . . ?
Yb1 O3 C22 C23 173.6(4) . . . . ?
O3 C22 C23 C24 -22.2(7) . . . . ?
C22 C23 C24 C25 35.3(7) . . . . ?
C22 O3 C25 C24 23.5(6) . . . . ?
Yb1 O3 C25 C24 -151.6(4) . . . . ?
C23 C24 C25 O3 -36.3(6) . . . . ?
C29 O4 C26 C27 -26.1(8) . . . . ?
Yb1 O4 C26 C27 138.4(6) . . . . ?
O4 C26 C27 C28 14.4(11) . . . . ?
C26 C27 C28 C29 2.9(11) . . . . ?
C26 O4 C29 C28 27.1(7) . . . . ?
Yb1 O4 C29 C28 -140.6(5) . . . . ?
C27 C28 C29 O4 -18.2(9) . . . . ?
 
_diffrn_measured_fraction_theta_max    1.000
_diffrn_reflns_theta_full              26.37
_diffrn_measured_fraction_theta_full   1.000
_refine_diff_density_max    1.272
_refine_diff_density_min   -0.909
_refine_diff_density_rms    0.086

# SQUEEZE RESULTS (APPEND TO CIF)
# Note: Data are Listed for all Voids in the P1 Unit Cell
# i.e. Centre of Gravity, Solvent Accessible Volume,
# Recovered number of Electrons in the Void and
# Details about the Squeezed Material
loop_
  _platon_squeeze_void_nr
  _platon_squeeze_void_average_x
  _platon_squeeze_void_average_y
  _platon_squeeze_void_average_z
  _platon_squeeze_void_volume
  _platon_squeeze_void_count_electrons
  _platon_squeeze_void_content
   1  0.055  0.195  0.545        26         1 ' '
   2  0.861  0.156  0.079         9         0 ' '
   3  0.939  0.180  0.644        13         0 ' '
   4  0.555  0.305  0.546        26         1 ' '
   5  0.439  0.319  0.644        13         0 ' '
   6  0.361  0.344  0.079         9         0 ' '
   7  0.445  0.695  0.045        26         1 ' '
   8  0.561  0.680  0.144        13         0 ' '
   9  0.639  0.656  0.579         9         0 ' '
  10  0.945  0.805  0.046        26         1 ' '
  11  0.061  0.819  0.144        13         0 ' '
  12  0.139  0.844  0.579         9         0 ' '
_platon_squeeze_details
;
;

#===END
data_4_1072j
 
_audit_creation_method            SHELXL-97
_chemical_name_systematic
;
 ?
;
_chemical_name_common             ?
_chemical_melting_point           ?
_chemical_formula_moiety          ?
_chemical_formula_sum
 'C36 H100 O2 Si14 Sm2'
_chemical_formula_weight          1259.12
 
loop_
 _atom_type_symbol
 _atom_type_description
 _atom_type_scat_dispersion_real
 _atom_type_scat_dispersion_imag
 _atom_type_scat_source
 'C'  'C'   0.0033   0.0016
 'International Tables Vol C Tables 4.2.6.8 and 6.1.1.4'
 'H'  'H'   0.0000   0.0000
 'International Tables Vol C Tables 4.2.6.8 and 6.1.1.4'
 'O'  'O'   0.0106   0.0060
 'International Tables Vol C Tables 4.2.6.8 and 6.1.1.4'
 'Si'  'Si'   0.0817   0.0704
 'International Tables Vol C Tables 4.2.6.8 and 6.1.1.4'
 'Sm'  'Sm'  -0.1638   3.4418
 'International Tables Vol C Tables 4.2.6.8 and 6.1.1.4'
 
_symmetry_cell_setting            monoclinic
_symmetry_space_group_name_H-M    C2/c
 
loop_
 _symmetry_equiv_pos_as_xyz
 'x, y, z'
 '-x, y, -z+1/2'
 'x+1/2, y+1/2, z'
 '-x+1/2, y+1/2, -z+1/2'
 '-x, -y, -z'
 'x, -y, z-1/2'
 '-x+1/2, -y+1/2, -z'
 'x+1/2, -y+1/2, z-1/2'
 
_cell_length_a                    23.027(5)
_cell_length_b                    14.538(3)
_cell_length_c                    19.296(4)
_cell_angle_alpha                 90.00
_cell_angle_beta                  102.44(3)
_cell_angle_gamma                 90.00
_cell_volume                      6308(2)
_cell_formula_units_Z             4
_cell_measurement_temperature     100(2)
_cell_measurement_reflns_used     16916
_cell_measurement_theta_min       5.751
_cell_measurement_theta_max       52.533
 
_exptl_crystal_description        blocks
_exptl_crystal_colour             green
_exptl_crystal_size_max           0.44
_exptl_crystal_size_mid           0.29
_exptl_crystal_size_min           0.23
_exptl_crystal_density_meas       ?
_exptl_crystal_density_diffrn     1.326
_exptl_crystal_density_method     'not measured'
_exptl_crystal_F_000              2608
_exptl_absorpt_coefficient_mu     2.136
_exptl_absorpt_correction_type    multi-scan
_exptl_absorpt_correction_T_min   0.4534
_exptl_absorpt_correction_T_max   0.6394
_exptl_absorpt_process_details    SADABS
 
_exptl_special_details
;
 ?
;
 
_diffrn_ambient_temperature       100(2)
_diffrn_radiation_wavelength      0.71073
_diffrn_radiation_type            MoK\a
_diffrn_radiation_source          'fine-focus sealed tube'
_diffrn_radiation_monochromator   graphite
_diffrn_measurement_device_type   'SMART APEX''
_diffrn_measurement_method        '\w scans'
_diffrn_detector_area_resol_mean  ?
_diffrn_standards_number          ?
_diffrn_standards_interval_count  ?
_diffrn_standards_interval_time   ?
_diffrn_standards_decay_%         ?
_diffrn_reflns_number             24683
_diffrn_reflns_av_R_equivalents   0.0225
_diffrn_reflns_av_sigmaI/netI     0.0203
_diffrn_reflns_limit_h_min        -28
_diffrn_reflns_limit_h_max        27
_diffrn_reflns_limit_k_min        -18
_diffrn_reflns_limit_k_max        18
_diffrn_reflns_limit_l_min        -24
_diffrn_reflns_limit_l_max        24
_diffrn_reflns_theta_min          1.67
_diffrn_reflns_theta_max          26.36
_reflns_number_total              6401
_reflns_number_gt                 6043
_reflns_threshold_expression      >2sigma(I)
 
_computing_data_collection        'Bruker XSCANS' 
_computing_cell_refinement        'Bruker XSCANS' 
_computing_data_reduction         'Bruker SHELXTL' 
_computing_structure_solution     'SHELXS-97 (Sheldrick, 1990)' 
_computing_structure_refinement   'SHELXL-97 (Sheldrick, 1997)' 
_computing_molecular_graphics     'Bruker SHELXTL' 
_computing_publication_material   'Bruker SHELXTL'
 
_refine_special_details
;
 Refinement of F^2^ against ALL reflections.  The weighted R-factor wR and
 goodness of fit S are based on F^2^, conventional R-factors R are based
 on F, with F set to zero for negative F^2^. The threshold expression of
 F^2^ > 2sigma(F^2^) is used only for calculating R-factors(gt) etc. and is
 not relevant to the choice of reflections for refinement.  R-factors based
 on F^2^ are statistically about twice as large as those based on F, and R-
 factors based on ALL data will be even larger.
;
 
_refine_ls_structure_factor_coef  Fsqd
_refine_ls_matrix_type            full
_refine_ls_weighting_scheme       calc
_refine_ls_weighting_details
 'calc w=1/[\s^2^(Fo^2^)+(0.0257P)^2^+7.3285P] where P=(Fo^2^+2Fc^2^)/3'
_atom_sites_solution_primary      direct
_atom_sites_solution_secondary    difmap
_atom_sites_solution_hydrogens    geom
_refine_ls_hydrogen_treatment     constr
_refine_ls_extinction_method      none
_refine_ls_extinction_coef        ?
_refine_ls_number_reflns          6401
_refine_ls_number_parameters      258
_refine_ls_number_restraints      0
_refine_ls_R_factor_all           0.0214
_refine_ls_R_factor_gt            0.0201
_refine_ls_wR_factor_ref          0.0501
_refine_ls_wR_factor_gt           0.0496
_refine_ls_goodness_of_fit_ref    1.042
_refine_ls_restrained_S_all       1.042
_refine_ls_shift/su_max           0.001
_refine_ls_shift/su_mean          0.000
 
loop_
 _atom_site_label
 _atom_site_type_symbol
 _atom_site_fract_x
 _atom_site_fract_y
 _atom_site_fract_z
 _atom_site_U_iso_or_equiv
 _atom_site_adp_type
 _atom_site_occupancy
 _atom_site_symmetry_multiplicity
 _atom_site_calc_flag
 _atom_site_refinement_flags
 _atom_site_disorder_assembly
 _atom_site_disorder_group
Sm1 Sm 0.187453(4) 0.222135(6) 0.050295(5) 0.01840(4) Uani 1 1 d . . .
Si1 Si 0.15811(2) 0.01767(3) 0.01659(3) 0.01661(10) Uani 1 1 d . . .
Si2 Si 0.25318(2) -0.00190(3) 0.09075(3) 0.01700(10) Uani 1 1 d . . .
Si3 Si 0.31540(2) 0.12595(3) 0.07699(3) 0.01670(10) Uani 1 1 d . . .
Si4 Si 0.17274(2) -0.01019(4) -0.09737(3) 0.01986(11) Uani 1 1 d . . .
Si5 Si 0.10071(2) -0.10551(4) 0.04226(3) 0.02009(11) Uani 1 1 d . . .
Si6 Si 0.36580(2) 0.16675(4) 0.19245(3) 0.02081(11) Uani 1 1 d . . .
Si7 Si 0.39523(2) 0.06909(4) 0.03067(3) 0.02156(11) Uani 1 1 d . . .
C1 C 0.24010(9) -0.00221(15) 0.18499(10) 0.0270(4) Uani 1 1 d . . .
H1A H 0.2168 -0.0566 0.1918 0.041 Uiso 1 1 calc R . .
H1B H 0.2183 0.0535 0.1927 0.041 Uiso 1 1 calc R . .
H1C H 0.2784 -0.0037 0.2190 0.041 Uiso 1 1 calc R . .
C2 C 0.29392(9) -0.11354(14) 0.08475(12) 0.0285(4) Uani 1 1 d . . .
H2A H 0.3321 -0.1128 0.1191 0.043 Uiso 1 1 calc R . .
H2B H 0.3010 -0.1206 0.0367 0.043 Uiso 1 1 calc R . .
H2C H 0.2698 -0.1651 0.0953 0.043 Uiso 1 1 calc R . .
C3 C 0.22120(9) 0.08651(14) -0.11864(10) 0.0251(4) Uani 1 1 d . . .
H3A H 0.2590 0.0870 -0.0837 0.038 Uiso 1 1 calc R . .
H3B H 0.2008 0.1454 -0.1171 0.038 Uiso 1 1 calc R . .
H3C H 0.2288 0.0772 -0.1662 0.038 Uiso 1 1 calc R . .
C4 C 0.21041(10) -0.12033(14) -0.11474(11) 0.0299(5) Uani 1 1 d . . .
H4A H 0.2152 -0.1210 -0.1640 0.045 Uiso 1 1 calc R . .
H4B H 0.1861 -0.1729 -0.1067 0.045 Uiso 1 1 calc R . .
H4C H 0.2496 -0.1243 -0.0826 0.045 Uiso 1 1 calc R . .
C5 C 0.10041(10) -0.00885(15) -0.16598(11) 0.0302(5) Uani 1 1 d . . .
H5A H 0.1084 0.0056 -0.2126 0.045 Uiso 1 1 calc R . .
H5B H 0.0739 0.0379 -0.1532 0.045 Uiso 1 1 calc R . .
H5C H 0.0814 -0.0694 -0.1676 0.045 Uiso 1 1 calc R . .
C6 C 0.13778(11) -0.22153(13) 0.04791(14) 0.0339(5) Uani 1 1 d . . .
H6A H 0.1725 -0.2219 0.0876 0.051 Uiso 1 1 calc R . .
H6B H 0.1506 -0.2340 0.0036 0.051 Uiso 1 1 calc R . .
H6C H 0.1096 -0.2690 0.0555 0.051 Uiso 1 1 calc R . .
C7 C 0.03146(10) -0.11704(17) -0.02949(12) 0.0365(5) Uani 1 1 d . . .
H7A H 0.0419 -0.1411 -0.0727 0.055 Uiso 1 1 calc R . .
H7B H 0.0126 -0.0566 -0.0394 0.055 Uiso 1 1 calc R . .
H7C H 0.0038 -0.1593 -0.0138 0.055 Uiso 1 1 calc R . .
C8 C 0.07599(9) -0.09030(15) 0.12837(11) 0.0275(4) Uani 1 1 d . . .
H8A H 0.0510 -0.1425 0.1356 0.041 Uiso 1 1 calc R . .
H8B H 0.0532 -0.0332 0.1267 0.041 Uiso 1 1 calc R . .
H8C H 0.1109 -0.0873 0.1676 0.041 Uiso 1 1 calc R . .
C9 C 0.42499(10) 0.25345(17) 0.18711(12) 0.0334(5) Uani 1 1 d . . .
H9A H 0.4085 0.3011 0.1525 0.050 Uiso 1 1 calc R . .
H9B H 0.4582 0.2228 0.1723 0.050 Uiso 1 1 calc R . .
H9C H 0.4391 0.2818 0.2338 0.050 Uiso 1 1 calc R . .
C10 C 0.40392(10) 0.07132(17) 0.25167(12) 0.0361(5) Uani 1 1 d . . .
H10A H 0.4366 0.0465 0.2322 0.054 Uiso 1 1 calc R . .
H10B H 0.3752 0.0223 0.2541 0.054 Uiso 1 1 calc R . .
H10C H 0.4197 0.0956 0.2994 0.054 Uiso 1 1 calc R . .
C11 C 0.31321(11) 0.21940(14) 0.24399(11) 0.0290(5) Uani 1 1 d . . .
H11A H 0.3357 0.2402 0.2903 0.044 Uiso 1 1 calc R . .
H11B H 0.2838 0.1734 0.2508 0.044 Uiso 1 1 calc R . .
H11C H 0.2928 0.2719 0.2176 0.044 Uiso 1 1 calc R . .
C12 C 0.43901(10) 0.17090(15) 0.00680(13) 0.0323(5) Uani 1 1 d . . .
H12A H 0.4807 0.1530 0.0111 0.049 Uiso 1 1 calc R . .
H12B H 0.4367 0.2221 0.0391 0.049 Uiso 1 1 calc R . .
H12C H 0.4222 0.1900 -0.0421 0.049 Uiso 1 1 calc R . .
C13 C 0.45037(10) -0.00423(17) 0.09256(13) 0.0354(5) Uani 1 1 d . . .
H13A H 0.4299 -0.0571 0.1078 0.053 Uiso 1 1 calc R . .
H13B H 0.4691 0.0321 0.1341 0.053 Uiso 1 1 calc R . .
H13C H 0.4809 -0.0260 0.0681 0.053 Uiso 1 1 calc R . .
C14 C 0.37449(10) 0.00061(17) -0.05385(12) 0.0342(5) Uani 1 1 d . . .
H14A H 0.4107 -0.0197 -0.0683 0.051 Uiso 1 1 calc R . .
H14B H 0.3508 0.0391 -0.0912 0.051 Uiso 1 1 calc R . .
H14C H 0.3511 -0.0532 -0.0460 0.051 Uiso 1 1 calc R . .
C15 C 0.15070(11) 0.30579(16) 0.21771(12) 0.0344(5) Uani 1 1 d . . .
H15A H 0.1524 0.3688 0.1988 0.041 Uiso 1 1 calc R . .
H15B H 0.1859 0.2962 0.2567 0.041 Uiso 1 1 calc R . .
C16 C 0.09372(13) 0.2922(2) 0.24442(17) 0.0556(8) Uani 1 1 d . . .
H16A H 0.1026 0.2664 0.2930 0.067 Uiso 1 1 calc R . .
H16B H 0.0725 0.3513 0.2449 0.067 Uiso 1 1 calc R . .
C17 C 0.05705(11) 0.22626(18) 0.19335(14) 0.0412(6) Uani 1 1 d . . .
H17A H 0.0306 0.2592 0.1539 0.049 Uiso 1 1 calc R . .
H17B H 0.0327 0.1863 0.2174 0.049 Uiso 1 1 calc R . .
C18 C 0.10362(10) 0.17155(15) 0.16735(12) 0.0305(5) Uani 1 1 d . . .
H18A H 0.1198 0.1222 0.2014 0.037 Uiso 1 1 calc R . .
H18B H 0.0868 0.1435 0.1206 0.037 Uiso 1 1 calc R . .
O1 O 0.14936(6) 0.23794(9) 0.16189(7) 0.0233(3) Uani 1 1 d . . .
 
loop_
 _atom_site_aniso_label
 _atom_site_aniso_U_11
 _atom_site_aniso_U_22
 _atom_site_aniso_U_33
 _atom_site_aniso_U_23
 _atom_site_aniso_U_13
 _atom_site_aniso_U_12
Sm1 0.02071(6) 0.01648(6) 0.02064(6) 0.00183(3) 0.01028(4) 0.00072(3)
Si1 0.0192(2) 0.0164(2) 0.0143(2) 0.00001(19) 0.00384(19) -0.00076(19)
Si2 0.0187(3) 0.0163(2) 0.0161(2) 0.00125(19) 0.00381(19) -0.00064(19)
Si3 0.0172(2) 0.0172(2) 0.0160(2) -0.00036(19) 0.00413(19) -0.00113(19)
Si4 0.0271(3) 0.0177(2) 0.0152(2) -0.00066(19) 0.0053(2) 0.0009(2)
Si5 0.0217(3) 0.0180(2) 0.0204(3) 0.0006(2) 0.0044(2) -0.0029(2)
Si6 0.0204(3) 0.0227(3) 0.0178(2) -0.0001(2) 0.0007(2) -0.0009(2)
Si7 0.0199(3) 0.0225(3) 0.0240(3) 0.0004(2) 0.0085(2) 0.0004(2)
C1 0.0265(11) 0.0355(11) 0.0187(9) 0.0047(8) 0.0041(8) -0.0057(9)
C2 0.0250(10) 0.0203(10) 0.0397(12) 0.0028(9) 0.0059(9) 0.0025(8)
C3 0.0336(11) 0.0235(10) 0.0206(9) 0.0014(8) 0.0109(8) -0.0011(8)
C4 0.0413(12) 0.0245(10) 0.0259(10) -0.0043(9) 0.0114(9) 0.0038(9)
C5 0.0386(12) 0.0298(11) 0.0193(10) -0.0021(8) 0.0000(9) -0.0011(9)
C6 0.0444(14) 0.0200(11) 0.0412(14) 0.0025(9) 0.0180(11) 0.0010(9)
C7 0.0318(12) 0.0402(13) 0.0332(12) 0.0023(10) -0.0023(10) -0.0165(10)
C8 0.0275(10) 0.0302(11) 0.0271(10) 0.0039(9) 0.0107(8) -0.0024(8)
C9 0.0287(11) 0.0379(12) 0.0312(12) -0.0053(10) 0.0012(9) -0.0095(10)
C10 0.0335(12) 0.0427(13) 0.0292(11) 0.0105(10) 0.0004(9) 0.0071(10)
C11 0.0374(12) 0.0307(12) 0.0193(10) -0.0025(8) 0.0069(9) 0.0006(9)
C12 0.0277(11) 0.0323(12) 0.0420(13) 0.0005(10) 0.0186(10) -0.0036(9)
C13 0.0257(11) 0.0424(13) 0.0401(13) 0.0074(10) 0.0112(10) 0.0101(10)
C14 0.0327(12) 0.0407(13) 0.0333(12) -0.0107(10) 0.0157(10) 0.0015(10)
C15 0.0408(13) 0.0331(12) 0.0319(12) -0.0149(10) 0.0138(10) -0.0074(10)
C16 0.0390(15) 0.074(2) 0.0586(18) -0.0385(16) 0.0214(13) -0.0092(13)
C17 0.0318(13) 0.0579(16) 0.0393(14) -0.0101(11) 0.0195(11) -0.0069(11)
C18 0.0353(12) 0.0309(11) 0.0302(11) -0.0053(9) 0.0180(9) -0.0111(9)
O1 0.0257(7) 0.0258(7) 0.0205(7) -0.0054(6) 0.0095(6) -0.0061(6)
 
_geom_special_details
;
 All esds (except the esd in the dihedral angle between two l.s. planes)
 are estimated using the full covariance matrix.  The cell esds are taken
 into account individually in the estimation of esds in distances, angles
 and torsion angles; correlations between esds in cell parameters are only
 used when they are defined by crystal symmetry.  An approximate (isotropic)
 treatment of cell esds is used for estimating esds involving l.s. planes.
;
 
loop_
 _geom_bond_atom_site_label_1
 _geom_bond_atom_site_label_2
 _geom_bond_distance
 _geom_bond_site_symmetry_2
 _geom_bond_publ_flag
Sm1 O1 2.5044(15) . ?
Sm1 Si1 3.0864(8) . ?
Sm1 Si3 3.2010(8) . ?
Sm1 Si3 3.2931(7) 7 ?
Sm1 Sm1 3.8898(9) 7 ?
Si1 Si4 2.3306(8) . ?
Si1 Si5 2.3413(8) . ?
Si1 Si2 2.3604(10) . ?
Si2 C2 1.891(2) . ?
Si2 C1 1.906(2) . ?
Si2 Si3 2.3963(8) . ?
Si3 Si6 2.3555(10) . ?
Si3 Si7 2.3601(9) . ?
Si3 Sm1 3.2931(7) 7 ?
Si4 C4 1.885(2) . ?
Si4 C5 1.891(2) . ?
Si4 C3 1.894(2) . ?
Si5 C7 1.881(2) . ?
Si5 C8 1.882(2) . ?
Si5 C6 1.883(2) . ?
Si6 C9 1.876(2) . ?
Si6 C11 1.887(2) . ?
Si6 C10 1.889(2) . ?
Si7 C13 1.876(2) . ?
Si7 C14 1.882(2) . ?
Si7 C12 1.902(2) . ?
C15 O1 1.456(2) . ?
C15 C16 1.523(4) . ?
C16 C17 1.498(4) . ?
C17 C18 1.505(3) . ?
C18 O1 1.449(2) . ?
 
loop_
 _geom_angle_atom_site_label_1
 _geom_angle_atom_site_label_2
 _geom_angle_atom_site_label_3
 _geom_angle
 _geom_angle_site_symmetry_1
 _geom_angle_site_symmetry_3
 _geom_angle_publ_flag
O1 Sm1 Si1 99.68(3) . . ?
O1 Sm1 Si3 112.48(4) . . ?
Si1 Sm1 Si3 76.428(18) . . ?
O1 Sm1 Si3 128.70(4) . 7 ?
Si1 Sm1 Si3 121.363(18) . 7 ?
Si3 Sm1 Si3 106.42(2) . 7 ?
O1 Sm1 Sm1 147.57(3) . 7 ?
Si1 Sm1 Sm1 104.330(12) . 7 ?
Si3 Sm1 Sm1 54.297(16) . 7 ?
Si3 Sm1 Sm1 52.126(17) 7 7 ?
Si4 Si1 Si5 105.64(3) . . ?
Si4 Si1 Si2 104.32(4) . . ?
Si5 Si1 Si2 105.76(3) . . ?
Si4 Si1 Sm1 107.25(2) . . ?
Si5 Si1 Sm1 143.14(3) . . ?
Si2 Si1 Sm1 81.72(2) . . ?
C2 Si2 C1 103.82(10) . . ?
C2 Si2 Si1 118.30(7) . . ?
C1 Si2 Si1 105.20(7) . . ?
C2 Si2 Si3 110.04(7) . . ?
C1 Si2 Si3 109.19(7) . . ?
Si1 Si2 Si3 109.75(3) . . ?
Si6 Si3 Si7 100.44(3) . . ?
Si6 Si3 Si2 105.96(3) . . ?
Si7 Si3 Si2 107.66(3) . . ?
Si6 Si3 Sm1 106.92(3) . . ?
Si7 Si3 Sm1 148.99(3) . . ?
Si2 Si3 Sm1 78.76(2) . . ?
Si6 Si3 Sm1 117.59(3) . 7 ?
Si7 Si3 Sm1 81.05(3) . 7 ?
Si2 Si3 Sm1 133.36(3) . 7 ?
Sm1 Si3 Sm1 73.58(2) . 7 ?
C4 Si4 C5 104.70(10) . . ?
C4 Si4 C3 106.07(10) . . ?
C5 Si4 C3 108.16(10) . . ?
C4 Si4 Si1 118.75(7) . . ?
C5 Si4 Si1 111.97(8) . . ?
C3 Si4 Si1 106.69(7) . . ?
C7 Si5 C8 106.89(11) . . ?
C7 Si5 C6 105.36(11) . . ?
C8 Si5 C6 105.89(10) . . ?
C7 Si5 Si1 109.89(8) . . ?
C8 Si5 Si1 112.88(7) . . ?
C6 Si5 Si1 115.34(8) . . ?
C9 Si6 C11 108.24(11) . . ?
C9 Si6 C10 106.16(11) . . ?
C11 Si6 C10 104.27(10) . . ?
C9 Si6 Si3 109.45(8) . . ?
C11 Si6 Si3 111.06(8) . . ?
C10 Si6 Si3 117.20(8) . . ?
C13 Si7 C14 105.16(11) . . ?
C13 Si7 C12 105.96(11) . . ?
C14 Si7 C12 104.52(11) . . ?
C13 Si7 Si3 115.68(8) . . ?
C14 Si7 Si3 116.13(8) . . ?
C12 Si7 Si3 108.41(7) . . ?
O1 C15 C16 106.26(18) . . ?
C17 C16 C15 105.4(2) . . ?
C16 C17 C18 102.5(2) . . ?
O1 C18 C17 104.68(17) . . ?
C18 O1 C15 107.29(15) . . ?
C18 O1 Sm1 113.34(11) . . ?
C15 O1 Sm1 137.96(12) . . ?
 
loop_
 _geom_torsion_atom_site_label_1
 _geom_torsion_atom_site_label_2
 _geom_torsion_atom_site_label_3
 _geom_torsion_atom_site_label_4
 _geom_torsion
 _geom_torsion_site_symmetry_1
 _geom_torsion_site_symmetry_2
 _geom_torsion_site_symmetry_3
 _geom_torsion_site_symmetry_4
 _geom_torsion_publ_flag
O1 Sm1 Si1 Si4 169.56(4) . . . . ?
Si3 Sm1 Si1 Si4 -79.47(4) . . . . ?
Si3 Sm1 Si1 Si4 21.69(3) 7 . . . ?
Sm1 Sm1 Si1 Si4 -32.41(3) 7 . . . ?
O1 Sm1 Si1 Si5 17.34(5) . . . . ?
Si3 Sm1 Si1 Si5 128.31(4) . . . . ?
Si3 Sm1 Si1 Si5 -130.54(4) 7 . . . ?
Sm1 Sm1 Si1 Si5 175.36(4) 7 . . . ?
O1 Sm1 Si1 Si2 -87.94(4) . . . . ?
Si3 Sm1 Si1 Si2 23.033(19) . . . . ?
Si3 Sm1 Si1 Si2 124.19(3) 7 . . . ?
Sm1 Sm1 Si1 Si2 70.09(2) 7 . . . ?
Si4 Si1 Si2 C2 -54.23(8) . . . . ?
Si5 Si1 Si2 C2 56.94(9) . . . . ?
Sm1 Si1 Si2 C2 -160.02(8) . . . . ?
Si4 Si1 Si2 C1 -169.53(7) . . . . ?
Si5 Si1 Si2 C1 -58.36(8) . . . . ?
Sm1 Si1 Si2 C1 84.68(7) . . . . ?
Si4 Si1 Si2 Si3 73.12(3) . . . . ?
Si5 Si1 Si2 Si3 -175.71(3) . . . . ?
Sm1 Si1 Si2 Si3 -32.67(2) . . . . ?
C2 Si2 Si3 Si6 -91.90(8) . . . . ?
C1 Si2 Si3 Si6 21.44(8) . . . . ?
Si1 Si2 Si3 Si6 136.26(3) . . . . ?
C2 Si2 Si3 Si7 14.89(8) . . . . ?
C1 Si2 Si3 Si7 128.22(8) . . . . ?
Si1 Si2 Si3 Si7 -116.95(3) . . . . ?
C2 Si2 Si3 Sm1 163.51(8) . . . . ?
C1 Si2 Si3 Sm1 -83.15(8) . . . . ?
Si1 Si2 Si3 Sm1 31.68(2) . . . . ?
C2 Si2 Si3 Sm1 109.25(8) . . . 7 ?
C1 Si2 Si3 Sm1 -137.41(7) . . . 7 ?
Si1 Si2 Si3 Sm1 -22.59(4) . . . 7 ?
O1 Sm1 Si3 Si6 -31.32(4) . . . . ?
Si1 Sm1 Si3 Si6 -126.34(3) . . . . ?
Si3 Sm1 Si3 Si6 114.52(3) 7 . . . ?
Sm1 Sm1 Si3 Si6 114.52(3) 7 . . . ?
O1 Sm1 Si3 Si7 177.79(5) . . . . ?
Si1 Sm1 Si3 Si7 82.78(5) . . . . ?
Si3 Sm1 Si3 Si7 -36.37(4) 7 . . . ?
Sm1 Sm1 Si3 Si7 -36.37(4) 7 . . . ?
O1 Sm1 Si3 Si2 72.13(4) . . . . ?
Si1 Sm1 Si3 Si2 -22.882(18) . . . . ?
Si3 Sm1 Si3 Si2 -142.03(2) 7 . . . ?
Sm1 Sm1 Si3 Si2 -142.03(2) 7 . . . ?
O1 Sm1 Si3 Sm1 -145.84(3) . . . 7 ?
Si1 Sm1 Si3 Sm1 119.146(18) . . . 7 ?
Si3 Sm1 Si3 Sm1 0.0 7 . . 7 ?
Si5 Si1 Si4 C4 -58.63(9) . . . . ?
Si2 Si1 Si4 C4 52.63(9) . . . . ?
Sm1 Si1 Si4 C4 138.25(8) . . . . ?
Si5 Si1 Si4 C5 63.60(8) . . . . ?
Si2 Si1 Si4 C5 174.86(8) . . . . ?
Sm1 Si1 Si4 C5 -99.52(8) . . . . ?
Si5 Si1 Si4 C3 -178.24(7) . . . . ?
Si2 Si1 Si4 C3 -66.99(7) . . . . ?
Sm1 Si1 Si4 C3 18.63(7) . . . . ?
Si4 Si1 Si5 C7 -54.20(9) . . . . ?
Si2 Si1 Si5 C7 -164.44(9) . . . . ?
Sm1 Si1 Si5 C7 98.27(10) . . . . ?
Si4 Si1 Si5 C8 -173.42(8) . . . . ?
Si2 Si1 Si5 C8 76.35(8) . . . . ?
Sm1 Si1 Si5 C8 -20.95(9) . . . . ?
Si4 Si1 Si5 C6 64.67(10) . . . . ?
Si2 Si1 Si5 C6 -45.56(9) . . . . ?
Sm1 Si1 Si5 C6 -142.85(9) . . . . ?
Si7 Si3 Si6 C9 58.80(9) . . . . ?
Si2 Si3 Si6 C9 170.73(9) . . . . ?
Sm1 Si3 Si6 C9 -106.44(9) . . . . ?
Sm1 Si3 Si6 C9 -26.48(9) 7 . . . ?
Si7 Si3 Si6 C11 178.24(7) . . . . ?
Si2 Si3 Si6 C11 -69.82(8) . . . . ?
Sm1 Si3 Si6 C11 13.01(8) . . . . ?
Sm1 Si3 Si6 C11 92.96(8) 7 . . . ?
Si7 Si3 Si6 C10 -62.09(9) . . . . ?
Si2 Si3 Si6 C10 49.84(9) . . . . ?
Sm1 Si3 Si6 C10 132.67(9) . . . . ?
Sm1 Si3 Si6 C10 -147.37(9) 7 . . . ?
Si6 Si3 Si7 C13 41.35(9) . . . . ?
Si2 Si3 Si7 C13 -69.27(9) . . . . ?
Sm1 Si3 Si7 C13 -166.90(9) . . . . ?
Sm1 Si3 Si7 C13 157.95(9) 7 . . . ?
Si6 Si3 Si7 C14 165.34(9) . . . . ?
Si2 Si3 Si7 C14 54.72(9) . . . . ?
Sm1 Si3 Si7 C14 -42.91(11) . . . . ?
Sm1 Si3 Si7 C14 -78.06(9) 7 . . . ?
Si6 Si3 Si7 C12 -77.43(8) . . . . ?
Si2 Si3 Si7 C12 171.95(8) . . . . ?
Sm1 Si3 Si7 C12 74.32(9) . . . . ?
Sm1 Si3 Si7 C12 39.16(8) 7 . . . ?
O1 C15 C16 C17 -9.3(3) . . . . ?
C15 C16 C17 C18 28.2(3) . . . . ?
C16 C17 C18 O1 -37.6(3) . . . . ?
C17 C18 O1 C15 32.7(2) . . . . ?
C17 C18 O1 Sm1 -136.21(15) . . . . ?
C16 C15 O1 C18 -14.5(3) . . . . ?
C16 C15 O1 Sm1 150.27(19) . . . . ?
Si1 Sm1 O1 C18 -24.70(13) . . . . ?
Si3 Sm1 O1 C18 -103.92(13) . . . . ?
Si3 Sm1 O1 C18 119.72(13) 7 . . . ?
Sm1 Sm1 O1 C18 -162.16(11) 7 . . . ?
Si1 Sm1 O1 C15 171.15(19) . . . . ?
Si3 Sm1 O1 C15 91.9(2) . . . . ?
Si3 Sm1 O1 C15 -44.4(2) 7 . . . ?
Sm1 Sm1 O1 C15 33.7(2) 7 . . . ?
 
_diffrn_measured_fraction_theta_max    0.995
_diffrn_reflns_theta_full              26.36
_diffrn_measured_fraction_theta_full   0.995
_refine_diff_density_max    0.802
_refine_diff_density_min   -0.380
_refine_diff_density_rms    0.067

# SQUEEZE RESULTS (APPEND TO CIF)
# Note: Data are Listed for all Voids in the P1 Unit Cell
# i.e. Centre of Gravity, Solvent Accessible Volume,
# Recovered number of Electrons in the Void and
# Details about the Squeezed Material
loop_
  _platon_squeeze_void_nr
  _platon_squeeze_void_average_x
  _platon_squeeze_void_average_y
  _platon_squeeze_void_average_z
  _platon_squeeze_void_volume
  _platon_squeeze_void_count_electrons
  _platon_squeeze_void_content
   1  0.500  0.069  0.750         9         0 ' '
   2  0.548  0.191  0.129        16         0 ' '
   3  0.451  0.191  0.371        16         0 ' '
   4  0.422  0.223  0.603        15         0 ' '
   5  0.578  0.223  0.897        15         0 ' '
   6  0.922  0.277  0.103        15         0 ' '
   7  0.078  0.277  0.397        15         0 ' '
   8  0.048  0.309  0.629        16         0 ' '
   9  0.952  0.309  0.871        16         0 ' '
  10  0.000  0.430  0.250         9         0 ' '
  11  0.000  0.569  0.750         9         0 ' '
  12  0.048  0.691  0.129        16         0 ' '
  13  0.951  0.691  0.371        16         0 ' '
  14  0.922  0.723  0.603        15         0 ' '
  15  0.078  0.723  0.897        15         0 ' '
  16  0.422  0.777  0.103        15         0 ' '
  17  0.578  0.777  0.397        15         0 ' '
  18  0.548  0.809  0.629        16         0 ' '
  19  0.452  0.809  0.871        16         0 ' '
  20  0.500  0.930  0.250         9         0 ' '
_platon_squeeze_details
;
;

#===END
 
data_6_1218j
 
_audit_creation_method            SHELXL-97 
_chemical_name_systematic 
; 
 ? 
; 
_chemical_name_common             ? 
_chemical_melting_point           ? 
_chemical_formula_moiety          ? 
_chemical_formula_sum 
 'C72 H212 O3 Si28 Yb2' 
_chemical_formula_weight          2259.02 
 
loop_ 
 _atom_type_symbol 
 _atom_type_description 
 _atom_type_scat_dispersion_real 
 _atom_type_scat_dispersion_imag 
 _atom_type_scat_source 
 'C'  'C'   0.0033   0.0016 
 'International Tables Vol C Tables 4.2.6.8 and 6.1.1.4' 
 'H'  'H'   0.0000   0.0000 
 'International Tables Vol C Tables 4.2.6.8 and 6.1.1.4' 
 'O'  'O'   0.0106   0.0060 
 'International Tables Vol C Tables 4.2.6.8 and 6.1.1.4' 
 'Si'  'Si'   0.0817   0.0704 
 'International Tables Vol C Tables 4.2.6.8 and 6.1.1.4' 
 'Yb'  'Yb'  -0.3850   5.5486 
 'International Tables Vol C Tables 4.2.6.8 and 6.1.1.4' 
 
_symmetry_cell_setting           orthorhombic
_symmetry_space_group_name_h-m   Pbca 
 
loop_ 
 _symmetry_equiv_pos_as_xyz 
 'x, y, z' 
 '-x+1/2, -y, z+1/2' 
 '-x, y+1/2, -z+1/2' 
 'x+1/2, -y+1/2, -z' 
 '-x, -y, -z' 
 'x-1/2, y, -z-1/2' 
 'x, -y-1/2, z-1/2' 
 '-x-1/2, y-1/2, z' 
 
_cell_length_a                    19.344(4) 
_cell_length_b                    20.358(4) 
_cell_length_c                    36.442(7) 
_cell_angle_alpha                 90.00 
_cell_angle_beta                  90.00 
_cell_angle_gamma                 90.00 
_cell_volume                      14351(5) 
_cell_formula_units_Z             4 
_cell_measurement_temperature     100(2) 
_cell_measurement_reflns_used     17134
_cell_measurement_theta_min       4.415
_cell_measurement_theta_max       48.856 
 
_exptl_crystal_description        plates 
_exptl_crystal_colour             yellow
_exptl_crystal_size_max           0.34 
_exptl_crystal_size_mid           0.25 
_exptl_crystal_size_min           0.16 
_exptl_crystal_density_meas       ? 
_exptl_crystal_density_diffrn     1.046 
_exptl_crystal_density_method     'not measured' 
_exptl_crystal_F_000              4800 
_exptl_absorpt_coefficient_mu     1.559 
_exptl_absorpt_correction_type    multi-scan
_exptl_absorpt_correction_T_min   0.6192 
_exptl_absorpt_correction_T_max   0.7885 
_exptl_absorpt_process_details    SADABS
 
_exptl_special_details 
; 
 ? 
; 
 
_diffrn_ambient_temperature       100(2) 
_diffrn_radiation_wavelength      0.71073 
_diffrn_radiation_type            MoK\a 
_diffrn_radiation_source          'fine-focus sealed tube' 
_diffrn_radiation_monochromator   graphite 
_diffrn_measurement_device_type   'SMART APEX'
_diffrn_measurement_method        '\w scans' 
_diffrn_detector_area_resol_mean  ? 
_diffrn_standards_number          ? 
_diffrn_standards_interval_count  ? 
_diffrn_standards_interval_time   ? 
_diffrn_standards_decay_%         ? 
_diffrn_reflns_number             110305 
_diffrn_reflns_av_R_equivalents   0.0792 
_diffrn_reflns_av_sigmaI/netI     0.0510 
_diffrn_reflns_limit_h_min        -24 
_diffrn_reflns_limit_h_max        24 
_diffrn_reflns_limit_k_min        -25 
_diffrn_reflns_limit_k_max        25 
_diffrn_reflns_limit_l_min        -45 
_diffrn_reflns_limit_l_max        45 
_diffrn_reflns_theta_min          1.54 
_diffrn_reflns_theta_max          26.39 
_reflns_number_total              14645 
_reflns_number_gt                 10371 
_reflns_threshold_expression      >2sigma(I) 
 
_computing_data_collection        'Bruker XSCANS' 
_computing_cell_refinement        'Bruker XSCANS' 
_computing_data_reduction         'Bruker SHELXTL' 
_computing_structure_solution     'SHELXS-97 (Sheldrick, 1990)' 
_computing_structure_refinement   'SHELXL-97 (Sheldrick, 1997)' 
_computing_molecular_graphics     'Bruker SHELXTL' 
_computing_publication_material   'Bruker SHELXTL'
 
_refine_special_details 
; 
 Refinement of F^2^ against ALL reflections.  The weighted R-factor wR and 
 goodness of fit S are based on F^2^, conventional R-factors R are based 
 on F, with F set to zero for negative F^2^. The threshold expression of 
 F^2^ > 2sigma(F^2^) is used only for calculating R-factors(gt) etc. and is 
 not relevant to the choice of reflections for refinement.  R-factors based 
 on F^2^ are statistically about twice as large as those based on F, and R- 
 factors based on ALL data will be even larger. 
; 
 
_refine_ls_structure_factor_coef  Fsqd  
_refine_ls_matrix_type            full 
_refine_ls_weighting_scheme       calc  
_refine_ls_weighting_details 
 'calc w=1/[\s^2^(Fo^2^)+(0.1431P)^2^+68.0602P] where P=(Fo^2^+2Fc^2^)/3' 
_atom_sites_solution_primary      direct 
_atom_sites_solution_secondary    difmap 
_atom_sites_solution_hydrogens    geom 
_refine_ls_hydrogen_treatment     constr
_refine_ls_extinction_method      none 
_refine_ls_extinction_coef        ? 
_refine_ls_number_reflns          14645 
_refine_ls_number_parameters      595 
_refine_ls_number_restraints      39 
_refine_ls_R_factor_all           0.1298 
_refine_ls_R_factor_gt            0.0987 
_refine_ls_wR_factor_ref          0.2835 
_refine_ls_wR_factor_gt           0.2620 
_refine_ls_goodness_of_fit_ref    1.078 
_refine_ls_restrained_S_all       1.078 
_refine_ls_shift/su_max           0.009
_refine_ls_shift/su_mean          0.002 
 
loop_ 
 _atom_site_label 
 _atom_site_type_symbol 
 _atom_site_fract_x 
 _atom_site_fract_y 
 _atom_site_fract_z 
 _atom_site_U_iso_or_equiv 
 _atom_site_adp_type 
 _atom_site_occupancy 
 _atom_site_symmetry_multiplicity 
 _atom_site_calc_flag 
 _atom_site_refinement_flags 
 _atom_site_disorder_assembly 
 _atom_site_disorder_group 
C33 C 0.0701(8) 0.4473(8) 0.8699(4) 0.057(4) Uani 0.649(18) 1 d P A 1 
H33A H 0.0299 0.4640 0.8559 0.068 Uiso 0.649(18) 1 calc PR A 1 
H33B H 0.1091 0.4780 0.8661 0.068 Uiso 0.649(18) 1 calc PR A 1 
C32 C 0.0523(9) 0.4454(7) 0.9098(4) 0.051(4) Uani 0.649(18) 1 d P A 1 
H32A H 0.0158 0.4120 0.9133 0.062 Uiso 0.649(18) 1 calc PR A 1 
H32B H 0.0936 0.4302 0.9234 0.062 Uiso 0.649(18) 1 calc PR A 1 
C36 C 0.0197(12) 0.4068(12) 0.8695(5) 0.044(7) Uani 0.351(18) 1 d P A 2 
H36A H -0.0134 0.3718 0.8627 0.052 Uiso 0.351(18) 1 calc PR A 2 
H36B H 0.0065 0.4466 0.8556 0.052 Uiso 0.351(18) 1 calc PR A 2 
C35 C 0.0091(14) 0.4216(12) 0.9099(6) 0.039(6) Uani 0.351(18) 1 d PU A 2 
H35A H 0.0358 0.3892 0.9244 0.047 Uiso 0.351(18) 1 calc PR A 2 
H35B H -0.0404 0.4149 0.9158 0.047 Uiso 0.351(18) 1 calc PR A 2 
Si10 Si 0.2157(4) 0.4308(6) 1.1098(2) 0.101(3) Uani 0.732(17) 1 d P B 3 
C16 C 0.1375(12) 0.3947(13) 1.0831(6) 0.140(11) Uani 0.732(17) 1 d P B 3 
H16A H 0.1503 0.3883 1.0573 0.209 Uiso 0.732(17) 1 calc PR B 3 
H16B H 0.0984 0.4251 1.0847 0.209 Uiso 0.732(17) 1 calc PR B 3 
H16C H 0.1244 0.3524 1.0939 0.209 Uiso 0.732(17) 1 calc PR B 3 
C17 C 0.172(2) 0.4696(18) 1.1485(7) 0.194(19) Uani 0.732(17) 1 d P B 3 
H17A H 0.1561 0.5136 1.1413 0.291 Uiso 0.732(17) 1 calc PR B 3 
H17B H 0.2035 0.4730 1.1693 0.291 Uiso 0.732(17) 1 calc PR B 3 
H17C H 0.1316 0.4430 1.1555 0.291 Uiso 0.732(17) 1 calc PR B 3 
C18 C 0.2658(13) 0.3581(12) 1.1241(7) 0.125(8) Uani 0.732(17) 1 d PU B 3 
H18A H 0.2876 0.3381 1.1026 0.187 Uiso 0.732(17) 1 calc PR B 3 
H18B H 0.2348 0.3262 1.1358 0.187 Uiso 0.732(17) 1 calc PR B 3 
H18C H 0.3016 0.3715 1.1416 0.187 Uiso 0.732(17) 1 calc PR B 3 
Si17 Si 0.2308(10) 0.4550(5) 1.1213(3) 0.055(4) Uani 0.268(17) 1 d P B 4 
C47 C 0.194(5) 0.365(4) 1.112(3) 0.18(3) Uani 0.268(17) 1 d PU B 4 
H47A H 0.2188 0.3332 1.1275 0.264 Uiso 0.268(17) 1 calc PR B 4 
H47B H 0.2018 0.3533 1.0860 0.264 Uiso 0.268(17) 1 calc PR B 4 
H47C H 0.1449 0.3635 1.1174 0.264 Uiso 0.268(17) 1 calc PR B 4 
C48 C 0.275(2) 0.459(2) 1.1657(9) 0.088(18) Uani 0.268(17) 1 d P B 4 
H48A H 0.2955 0.5025 1.1690 0.132 Uiso 0.268(17) 1 calc PR B 4 
H48B H 0.3118 0.4256 1.1664 0.132 Uiso 0.268(17) 1 calc PR B 4 
H48C H 0.2420 0.4503 1.1854 0.132 Uiso 0.268(17) 1 calc PR B 4 
C40 C 0.1418(17) 0.482(4) 1.1247(15) 0.13(3) Uani 0.268(17) 1 d P B 4 
H40A H 0.1131 0.4556 1.1081 0.193 Uiso 0.268(17) 1 calc PR B 4 
H40B H 0.1387 0.5283 1.1179 0.193 Uiso 0.268(17) 1 calc PR B 4 
H40C H 0.1255 0.4761 1.1500 0.193 Uiso 0.268(17) 1 calc PR B 4 
Yb2 Yb 0.07269(7) 0.54770(7) 1.00875(4) 0.0316(5) Uani 0.2040(14) 1 d P . 5 
Yb1 Yb 0.07347(2) 0.45212(2) 1.006830(13) 0.04445(18) Uani 0.7960(14) 1 d P . 6 
O2 O 0.0146(3) 0.5026(3) 0.96169(14) 0.0467(14) Uani 1 1 d . . . 
Si1 Si 0.11082(13) 0.36677(12) 0.80675(6) 0.0453(5) Uani 1 1 d . A . 
Si2 Si 0.22729(15) 0.39737(14) 0.79818(8) 0.0623(7) Uani 1 1 d . . . 
Si3 Si 0.0486(2) 0.4372(2) 0.76841(10) 0.0925(12) Uani 1 1 d . . . 
Si4 Si 0.08650(12) 0.25279(13) 0.80149(7) 0.0495(6) Uani 1 1 d . . . 
Si5 Si 0.15047(16) 0.19696(16) 0.75658(10) 0.0737(9) Uani 1 1 d . . . 
Si6 Si 0.11139(17) 0.19980(15) 0.85788(9) 0.0698(8) Uani 1 1 d . . . 
Si7 Si -0.03181(14) 0.23197(17) 0.79158(8) 0.0649(8) Uani 1 1 d . . . 
Si8 Si 0.22404(12) 0.48898(12) 1.01246(7) 0.0488(6) Uani 1 1 d . . . 
Si9 Si 0.27590(13) 0.50643(12) 1.07081(6) 0.0487(6) Uani 1 1 d . B . 
Si11 Si 0.39501(15) 0.49128(15) 1.07919(8) 0.0645(8) Uani 1 1 d . . . 
Si12 Si 0.2516(2) 0.6142(2) 1.09054(8) 0.1010(15) Uani 1 1 d . . . 
Si13 Si 0.25967(17) 0.56626(13) 0.96951(6) 0.0597(7) Uani 1 1 d . . . 
Si14 Si 0.2771(2) 0.39392(15) 0.98620(9) 0.0755(9) Uani 1 1 d . . . 
C1 C 0.2514(10) 0.4048(14) 0.7493(4) 0.224(15) Uani 1 1 d . . . 
H1A H 0.2750 0.4468 0.7453 0.336 Uiso 1 1 calc R . . 
H1B H 0.2096 0.4030 0.7341 0.336 Uiso 1 1 calc R . . 
H1C H 0.2822 0.3686 0.7425 0.336 Uiso 1 1 calc R . . 
C2 C 0.2451(9) 0.4758(10) 0.8209(7) 0.195(13) Uani 1 1 d . . . 
H2A H 0.2908 0.4917 0.8135 0.293 Uiso 1 1 calc R . . 
H2B H 0.2441 0.4696 0.8476 0.293 Uiso 1 1 calc R . . 
H2C H 0.2098 0.5080 0.8139 0.293 Uiso 1 1 calc R . . 
C3 C 0.2910(8) 0.3431(10) 0.8218(10) 0.242(17) Uani 1 1 d . . . 
H3A H 0.2896 0.2992 0.8107 0.363 Uiso 1 1 calc R . . 
H3B H 0.2794 0.3400 0.8479 0.363 Uiso 1 1 calc R . . 
H3C H 0.3375 0.3615 0.8190 0.363 Uiso 1 1 calc R . . 
C4 C 0.0756(10) 0.5244(8) 0.7798(7) 0.160(9) Uani 1 1 d . . . 
H4A H 0.0503 0.5552 0.7641 0.239 Uiso 1 1 calc R . . 
H4B H 0.1254 0.5294 0.7755 0.239 Uiso 1 1 calc R . . 
H4C H 0.0652 0.5337 0.8056 0.239 Uiso 1 1 calc R . . 
C5 C 0.0635(12) 0.4137(14) 0.7190(4) 0.189(11) Uani 1 1 d . . . 
H5A H 0.0632 0.3658 0.7167 0.283 Uiso 1 1 calc R . . 
H5B H 0.1084 0.4308 0.7109 0.283 Uiso 1 1 calc R . . 
H5C H 0.0268 0.4324 0.7037 0.283 Uiso 1 1 calc R . . 
C6 C -0.0439(7) 0.4373(7) 0.7736(5) 0.108(5) Uani 1 1 d . . . 
H6A H -0.0654 0.4537 0.7510 0.162 Uiso 1 1 calc R . . 
H6B H -0.0568 0.4657 0.7942 0.162 Uiso 1 1 calc R . . 
H6C H -0.0600 0.3924 0.7784 0.162 Uiso 1 1 calc R . . 
C7 C 0.2372(6) 0.1761(8) 0.7721(5) 0.110(5) Uani 1 1 d . . . 
H7A H 0.2650 0.1616 0.7511 0.165 Uiso 1 1 calc R . . 
H7B H 0.2346 0.1407 0.7903 0.165 Uiso 1 1 calc R . . 
H7C H 0.2587 0.2149 0.7832 0.165 Uiso 1 1 calc R . . 
C8 C 0.1557(10) 0.2474(9) 0.7139(4) 0.134(6) Uani 1 1 d . . . 
H8A H 0.1898 0.2824 0.7173 0.201 Uiso 1 1 calc R . . 
H8B H 0.1104 0.2668 0.7088 0.201 Uiso 1 1 calc R . . 
H8C H 0.1696 0.2194 0.6933 0.201 Uiso 1 1 calc R . . 
C9 C 0.1037(9) 0.1208(8) 0.7422(7) 0.169(10) Uani 1 1 d . . . 
H9A H 0.0758 0.1302 0.7204 0.254 Uiso 1 1 calc R . . 
H9B H 0.0736 0.1061 0.7622 0.254 Uiso 1 1 calc R . . 
H9C H 0.1373 0.0863 0.7365 0.254 Uiso 1 1 calc R . . 
C10 C 0.1085(7) 0.1074(5) 0.8516(4) 0.102(5) Uani 1 1 d . . . 
H10A H 0.1464 0.0937 0.8354 0.153 Uiso 1 1 calc R . . 
H10B H 0.0642 0.0949 0.8406 0.153 Uiso 1 1 calc R . . 
H10C H 0.1135 0.0859 0.8755 0.153 Uiso 1 1 calc R . . 
C11 C 0.1996(7) 0.2212(6) 0.8747(4) 0.093(4) Uani 1 1 d . . . 
H11A H 0.2032 0.2689 0.8776 0.140 Uiso 1 1 calc R . . 
H11B H 0.2341 0.2060 0.8570 0.140 Uiso 1 1 calc R . . 
H11C H 0.2077 0.1998 0.8984 0.140 Uiso 1 1 calc R . . 
C12 C 0.0488(8) 0.2218(7) 0.8946(3) 0.102(5) Uani 1 1 d . . . 
H12A H 0.0507 0.1888 0.9141 0.153 Uiso 1 1 calc R . . 
H12B H 0.0020 0.2233 0.8843 0.153 Uiso 1 1 calc R . . 
H12C H 0.0608 0.2650 0.9047 0.153 Uiso 1 1 calc R . . 
C13 C -0.0897(6) 0.2805(7) 0.8222(4) 0.092(4) Uani 1 1 d . . . 
H13A H -0.0801 0.3275 0.8191 0.139 Uiso 1 1 calc R . . 
H13B H -0.0814 0.2680 0.8478 0.139 Uiso 1 1 calc R . . 
H13C H -0.1380 0.2716 0.8158 0.139 Uiso 1 1 calc R . . 
C14 C -0.0546(7) 0.1454(7) 0.8026(4) 0.094(4) Uani 1 1 d . . . 
H14A H -0.0532 0.1391 0.8293 0.142 Uiso 1 1 calc R . . 
H14B H -0.0213 0.1158 0.7909 0.142 Uiso 1 1 calc R . . 
H14C H -0.1012 0.1358 0.7935 0.142 Uiso 1 1 calc R . . 
C15 C -0.0559(6) 0.2499(8) 0.7430(3) 0.097(5) Uani 1 1 d . . . 
H15A H -0.1047 0.2390 0.7392 0.146 Uiso 1 1 calc R . . 
H15B H -0.0271 0.2235 0.7265 0.146 Uiso 1 1 calc R . . 
H15C H -0.0485 0.2967 0.7380 0.146 Uiso 1 1 calc R . . 
C19 C 0.4212(8) 0.5105(7) 1.1270(4) 0.102(5) Uani 1 1 d . . . 
H19A H 0.3988 0.4796 1.1439 0.154 Uiso 1 1 calc R . . 
H19B H 0.4071 0.5554 1.1331 0.154 Uiso 1 1 calc R . . 
H19C H 0.4715 0.5065 1.1293 0.154 Uiso 1 1 calc R . . 
C20 C 0.4255(7) 0.4058(7) 1.0710(5) 0.138(8) Uani 1 1 d . . . 
H20A H 0.4761 0.4045 1.0724 0.206 Uiso 1 1 calc R . . 
H20B H 0.4105 0.3912 1.0467 0.206 Uiso 1 1 calc R . . 
H20C H 0.4061 0.3766 1.0898 0.206 Uiso 1 1 calc R . . 
C21 C 0.4474(7) 0.5441(11) 1.0494(5) 0.147(9) Uani 1 1 d . . . 
H21A H 0.4961 0.5316 1.0516 0.221 Uiso 1 1 calc R . . 
H21B H 0.4417 0.5900 1.0569 0.221 Uiso 1 1 calc R . . 
H21C H 0.4323 0.5389 1.0239 0.221 Uiso 1 1 calc R . . 
C22 C 0.2640(8) 0.6291(7) 1.1410(3) 0.104(5) Uani 1 1 d . . . 
H22A H 0.2514 0.6745 1.1469 0.157 Uiso 1 1 calc R . . 
H22B H 0.3126 0.6216 1.1475 0.157 Uiso 1 1 calc R . . 
H22C H 0.2347 0.5989 1.1550 0.157 Uiso 1 1 calc R . . 
C23 C 0.1612(11) 0.6363(12) 1.0805(4) 0.206(14) Uani 1 1 d . . . 
H23A H 0.1507 0.6791 1.0915 0.309 Uiso 1 1 calc R . . 
H23B H 0.1303 0.6030 1.0909 0.309 Uiso 1 1 calc R . . 
H23C H 0.1545 0.6386 1.0539 0.309 Uiso 1 1 calc R . . 
C24 C 0.3090(12) 0.6752(6) 1.0674(5) 0.160(9) Uani 1 1 d . . . 
H24A H 0.3028 0.7184 1.0788 0.241 Uiso 1 1 calc R . . 
H24B H 0.2969 0.6779 1.0413 0.241 Uiso 1 1 calc R . . 
H24C H 0.3573 0.6614 1.0699 0.241 Uiso 1 1 calc R . . 
C25 C 0.3490(9) 0.6000(8) 0.9698(3) 0.134(7) Uani 1 1 d . . . 
H25A H 0.3817 0.5649 0.9759 0.201 Uiso 1 1 calc R . . 
H25B H 0.3523 0.6350 0.9881 0.201 Uiso 1 1 calc R . . 
H25C H 0.3600 0.6178 0.9455 0.201 Uiso 1 1 calc R . . 
C26 C 0.1972(10) 0.6411(7) 0.9729(4) 0.129(7) Uani 1 1 d . . . 
H26A H 0.2179 0.6749 0.9886 0.193 Uiso 1 1 calc R . . 
H26B H 0.1531 0.6269 0.9835 0.193 Uiso 1 1 calc R . . 
H26C H 0.1892 0.6591 0.9483 0.193 Uiso 1 1 calc R . . 
C27 C 0.2407(6) 0.5393(6) 0.9220(2) 0.073(3) Uani 1 1 d . . . 
H27A H 0.2463 0.5765 0.9052 0.110 Uiso 1 1 calc R . . 
H27B H 0.1931 0.5230 0.9206 0.110 Uiso 1 1 calc R . . 
H27C H 0.2727 0.5041 0.9150 0.110 Uiso 1 1 calc R . . 
C28 C 0.3673(7) 0.4058(8) 0.9674(4) 0.111(5) Uani 1 1 d . . . 
H28A H 0.4004 0.4074 0.9877 0.166 Uiso 1 1 calc R . . 
H28B H 0.3693 0.4470 0.9536 0.166 Uiso 1 1 calc R . . 
H28C H 0.3789 0.3691 0.9511 0.166 Uiso 1 1 calc R . . 
C29 C 0.2825(9) 0.3231(6) 1.0183(5) 0.119(6) Uani 1 1 d . . . 
H29A H 0.2371 0.3155 1.0295 0.178 Uiso 1 1 calc R . . 
H29B H 0.3164 0.3327 1.0375 0.178 Uiso 1 1 calc R . . 
H29C H 0.2968 0.2837 1.0048 0.178 Uiso 1 1 calc R . . 
C30 C 0.2242(11) 0.3646(8) 0.9466(4) 0.150(8) Uani 1 1 d . . . 
H30A H 0.2363 0.3189 0.9410 0.225 Uiso 1 1 calc R . . 
H30B H 0.2335 0.3922 0.9251 0.225 Uiso 1 1 calc R . . 
H30C H 0.1750 0.3673 0.9528 0.225 Uiso 1 1 calc R . . 
C31 C 0.0320(5) 0.4980(7) 0.9242(3) 0.087(4) Uani 1 1 d . A . 
H31A H -0.0091 0.5124 0.9102 0.130 Uiso 1 1 calc R C 1 
H31B H 0.0686 0.5311 0.9197 0.130 Uiso 1 1 calc R C 1 
H31C H 0.0057 0.5299 0.9108 0.130 Uiso 1 1 d R C 2 
H31D H 0.0807 0.5053 0.9209 0.130 Uiso 1 1 d R C 2 
C34 C 0.0878(6) 0.3865(7) 0.8569(3) 0.083(4) Uani 1 1 d . . . 
H34A H 0.0491 0.3570 0.8635 0.125 Uiso 1 1 calc R A 1 
H34B H 0.1279 0.3721 0.8718 0.125 Uiso 1 1 calc R A 1 
H34C H 0.1000 0.3481 0.8708 0.125 Uiso 1 1 d R A 2 
H34D H 0.1189 0.4207 0.8645 0.125 Uiso 1 1 d R A 2 
O1 O 0.0422(4) 0.3395(4) 1.0060(3) 0.033(2) Uani 0.50 1 d PDU . . 
C90 C -0.0340(4) 0.3336(8) 1.0062(7) 0.074(6) Uani 0.50 1 d PDU . . 
H90A H -0.0528 0.3352 1.0315 0.089 Uiso 0.50 1 calc PR D 6 
H90B H -0.0561 0.3683 0.9912 0.089 Uiso 0.50 1 calc PR D 6 
C91 C 0.0730(8) 0.2730(5) 1.0075(18) 0.26(4) Uani 0.50 1 d PDU . . 
H91A H 0.1041 0.2679 1.0289 0.310 Uiso 0.50 1 calc PR . . 
H91B H 0.0988 0.2626 0.9847 0.310 Uiso 0.50 1 calc PR . . 
C93 C -0.0428(11) 0.2678(8) 0.9896(7) 0.083(6) Uani 0.50 1 d PDU . . 
H93A H -0.0898 0.2500 0.9937 0.100 Uiso 0.50 1 calc PR . . 
H93B H -0.0322 0.2679 0.9630 0.100 Uiso 0.50 1 calc PR . . 
C92 C 0.0101(12) 0.2322(11) 1.0111(12) 0.17(2) Uani 0.50 1 d PDU . . 
H92A H 0.0179 0.1876 1.0010 0.208 Uiso 0.50 1 calc PR . . 
H92B H -0.0039 0.2283 1.0371 0.208 Uiso 0.50 1 calc PR . . 
 
loop_ 
 _atom_site_aniso_label 
 _atom_site_aniso_U_11 
 _atom_site_aniso_U_22 
 _atom_site_aniso_U_33 
 _atom_site_aniso_U_23 
 _atom_site_aniso_U_13 
 _atom_site_aniso_U_12 
C33 0.061(9) 0.071(10) 0.038(7) -0.003(6) 0.004(6) 0.018(8) 
C32 0.055(9) 0.063(9) 0.036(7) -0.017(6) 0.016(6) -0.005(7) 
C36 0.051(14) 0.054(14) 0.026(10) -0.009(9) 0.007(9) -0.023(11) 
C35 0.041(9) 0.048(9) 0.028(8) -0.005(7) 0.007(7) -0.001(8) 
Si10 0.109(4) 0.144(8) 0.051(4) 0.046(5) -0.010(3) -0.045(5) 
C16 0.128(18) 0.20(2) 0.095(14) 0.061(16) -0.023(13) -0.094(18) 
C17 0.23(4) 0.28(4) 0.069(15) -0.02(2) 0.06(2) -0.14(3) 
C18 0.125(8) 0.125(8) 0.125(8) 0.0002(10) -0.0002(10) -0.0002(10) 
Si17 0.107(11) 0.034(5) 0.024(5) -0.011(4) 0.005(5) -0.019(5) 
C47 0.18(3) 0.18(3) 0.18(3) 0.0000(10) 0.0000(10) 0.0000(10) 
C48 0.07(3) 0.15(4) 0.037(19) 0.06(2) 0.026(18) 0.04(3) 
C40 0.017(16) 0.28(8) 0.09(4) 0.11(4) -0.022(19) -0.04(3) 
Yb2 0.0318(9) 0.0387(9) 0.0242(8) -0.0022(6) -0.0003(6) 0.0027(6) 
Yb1 0.0404(3) 0.0495(3) 0.0434(3) 0.00208(19) 0.00230(19) -0.00648(19) 
O2 0.044(3) 0.073(4) 0.023(2) -0.001(2) 0.002(2) -0.007(3) 
Si1 0.0537(14) 0.0515(13) 0.0308(10) 0.0049(9) 0.0120(10) 0.0024(10) 
Si2 0.0688(17) 0.0646(16) 0.0535(15) -0.0101(12) 0.0185(13) -0.0216(14) 
Si3 0.105(3) 0.107(3) 0.065(2) 0.0411(19) -0.0015(19) 0.027(2) 
Si4 0.0427(12) 0.0557(14) 0.0501(13) 0.0033(11) -0.0026(10) -0.0103(11) 
Si5 0.0604(17) 0.0721(19) 0.088(2) -0.0193(16) 0.0142(15) -0.0141(15) 
Si6 0.077(2) 0.0602(17) 0.0720(19) 0.0238(14) -0.0192(15) -0.0179(14) 
Si7 0.0446(14) 0.099(2) 0.0509(15) -0.0062(14) 0.0032(11) -0.0161(14) 
Si8 0.0409(12) 0.0589(15) 0.0466(13) 0.0159(11) -0.0053(10) -0.0052(10) 
Si9 0.0500(13) 0.0638(15) 0.0323(11) 0.0111(10) 0.0040(10) 0.0171(11) 
Si11 0.0564(16) 0.083(2) 0.0545(15) -0.0171(13) -0.0240(13) 0.0228(14) 
Si12 0.150(3) 0.113(3) 0.0402(14) -0.0105(16) -0.0097(18) 0.087(3) 
Si13 0.089(2) 0.0588(15) 0.0315(12) 0.0030(10) -0.0018(12) -0.0200(14) 
Si14 0.101(2) 0.0541(16) 0.0719(19) -0.0101(14) -0.0209(17) 0.0087(16) 
C1 0.166(17) 0.45(4) 0.052(7) -0.058(15) 0.057(10) -0.20(2) 
C2 0.119(14) 0.158(16) 0.31(3) -0.16(2) 0.096(17) -0.082(13) 
C3 0.056(9) 0.157(18) 0.51(5) 0.15(3) -0.044(17) -0.017(10) 
C4 0.17(2) 0.079(10) 0.23(2) 0.064(13) -0.047(16) 0.013(11) 
C5 0.21(2) 0.30(3) 0.053(8) 0.068(13) 0.007(11) 0.08(2) 
C6 0.086(9) 0.109(11) 0.129(13) 0.025(9) -0.025(9) 0.032(8) 
C7 0.058(8) 0.119(11) 0.154(14) -0.018(10) 0.023(8) -0.001(7) 
C8 0.163(16) 0.150(15) 0.089(11) -0.025(10) 0.055(11) 0.006(13) 
C9 0.123(14) 0.120(13) 0.26(3) -0.122(16) 0.073(15) -0.047(11) 
C10 0.101(10) 0.058(7) 0.148(13) 0.028(7) -0.036(9) -0.017(7) 
C11 0.106(10) 0.080(8) 0.094(9) 0.028(7) -0.048(8) -0.030(7) 
C12 0.128(11) 0.117(11) 0.061(7) 0.035(7) 0.014(7) -0.034(9) 
C13 0.061(7) 0.126(11) 0.091(9) -0.011(8) 0.023(6) -0.012(7) 
C14 0.080(8) 0.113(10) 0.090(9) -0.001(7) -0.006(7) -0.056(8) 
C15 0.054(6) 0.172(15) 0.066(8) -0.009(8) -0.005(5) 0.001(8) 
C19 0.144(13) 0.092(9) 0.071(8) -0.015(7) -0.069(8) 0.025(8) 
C20 0.101(11) 0.099(10) 0.212(19) -0.070(11) -0.071(11) 0.077(9) 
C21 0.058(8) 0.29(3) 0.090(11) 0.027(13) -0.017(7) -0.040(12) 
C22 0.145(12) 0.131(11) 0.037(5) -0.026(6) -0.024(7) 0.057(10) 
C23 0.23(2) 0.30(3) 0.078(10) -0.062(13) -0.054(12) 0.23(2) 
C24 0.33(3) 0.042(7) 0.108(12) 0.015(7) 0.028(15) 0.024(11) 
C25 0.175(15) 0.165(14) 0.063(7) 0.051(8) -0.055(9) -0.120(13) 
C26 0.24(2) 0.088(9) 0.060(8) 0.001(7) -0.010(10) 0.063(11) 
C27 0.097(8) 0.087(8) 0.035(5) 0.010(5) -0.011(5) -0.016(6) 
C28 0.083(9) 0.152(14) 0.097(10) -0.025(10) 0.005(8) 0.035(9) 
C29 0.148(14) 0.062(8) 0.146(14) -0.027(8) -0.054(11) 0.016(8) 
C30 0.26(2) 0.096(11) 0.094(11) -0.017(8) -0.077(13) -0.056(13) 
C31 0.042(6) 0.185(15) 0.033(5) 0.005(7) -0.002(4) -0.019(7) 
C34 0.088(8) 0.120(10) 0.041(5) 0.019(6) 0.027(5) 0.030(7) 
O1 0.027(5) 0.023(4) 0.049(6) 0.006(4) 0.001(4) -0.011(4) 
C90 0.055(8) 0.065(10) 0.102(17) -0.011(10) 0.018(11) -0.014(8) 
C91 0.059(11) 0.022(8) 0.69(12) -0.03(3) -0.05(3) -0.023(7) 
C93 0.081(8) 0.074(8) 0.095(10) -0.018(7) -0.014(8) -0.030(7) 
C92 0.119(19) 0.043(9) 0.36(6) 0.09(2) -0.09(2) -0.066(11) 
 
_geom_special_details 
; 
 All esds (except the esd in the dihedral angle between two l.s. planes) 
 are estimated using the full covariance matrix.  The cell esds are taken 
 into account individually in the estimation of esds in distances, angles 
 and torsion angles; correlations between esds in cell parameters are only 
 used when they are defined by crystal symmetry.  An approximate (isotropic) 
 treatment of cell esds is used for estimating esds involving l.s. planes. 
; 
 
loop_ 
 _geom_bond_atom_site_label_1 
 _geom_bond_atom_site_label_2 
 _geom_bond_distance 
 _geom_bond_site_symmetry_2 
 _geom_bond_publ_flag 
C33 C34 1.368(18) . ? 
C33 C32 1.492(19) . ? 
C32 C31 1.255(17) . ? 
C36 C34 1.46(3) . ? 
C36 C35 1.52(3) . ? 
C35 C31 1.70(3) . ? 
Si10 C17 1.83(3) . ? 
Si10 C18 1.84(2) . ? 
Si10 C16 1.94(2) . ? 
Si10 Si9 2.397(7) . ? 
Si17 C40 1.81(5) . ? 
Si17 C48 1.83(4) . ? 
Si17 C47 2.00(9) . ? 
Si17 Si9 2.291(12) . ? 
Yb2 O2 2.246(5) . ? 
Yb2 O2 2.249(6) 5_567 ? 
Yb2 C90 2.588(19) 5_567 ? 
Yb2 Si8 3.165(3) . ? 
Yb2 Yb2 3.477(3) 5_567 ? 
Yb1 O2 2.249(5) . ? 
Yb1 O2 2.251(6) 5_567 ? 
Yb1 O1 2.371(8) . ? 
Yb1 Si8 3.015(3) . ? 
Yb1 C90 3.185(13) . ? 
Yb1 Yb1 3.4825(10) 5_567 ? 
O2 C31 1.410(11) . ? 
O2 Yb2 2.249(5) 5_567 ? 
O2 Yb1 2.251(5) 5_567 ? 
Si1 C34 1.925(10) . ? 
Si1 Si3 2.336(4) . ? 
Si1 Si2 2.358(4) . ? 
Si1 Si4 2.375(4) . ? 
Si2 C2 1.831(14) . ? 
Si2 C1 1.848(13) . ? 
Si2 C3 1.865(18) . ? 
Si3 C6 1.800(15) . ? 
Si3 C5 1.885(18) . ? 
Si3 C4 1.898(19) . ? 
Si4 Si5 2.346(4) . ? 
Si4 Si7 2.355(3) . ? 
Si4 Si6 2.370(4) . ? 
Si5 C7 1.820(14) . ? 
Si5 C8 1.866(17) . ? 
Si5 C9 1.869(14) . ? 
Si6 C12 1.859(14) . ? 
Si6 C11 1.864(12) . ? 
Si6 C10 1.895(12) . ? 
Si7 C14 1.860(13) . ? 
Si7 C13 1.865(12) . ? 
Si7 C15 1.865(12) . ? 
Si8 Si13 2.324(3) . ? 
Si8 Si9 2.378(3) . ? 
Si8 Si14 2.390(4) . ? 
Si9 Si11 2.345(4) . ? 
Si9 Si12 2.355(4) . ? 
Si11 C21 1.832(17) . ? 
Si11 C19 1.857(11) . ? 
Si11 C20 1.862(12) . ? 
Si12 C23 1.843(17) . ? 
Si12 C24 1.868(18) . ? 
Si12 C22 1.881(10) . ? 
Si13 C27 1.854(10) . ? 
Si13 C25 1.859(14) . ? 
Si13 C26 1.948(14) . ? 
Si14 C29 1.860(16) . ? 
Si14 C30 1.868(13) . ? 
Si14 C28 1.890(14) . ? 
O1 C91 1.4798(11) . ? 
O1 C90 1.4802(11) . ? 
C90 C93 1.4800(11) . ? 
C90 Yb2 2.588(19) 5_567 ? 
C91 C92 1.4801(11) . ? 
C93 C92 1.4799(11) . ? 
 
loop_ 
 _geom_angle_atom_site_label_1 
 _geom_angle_atom_site_label_2 
 _geom_angle_atom_site_label_3 
 _geom_angle 
 _geom_angle_site_symmetry_1 
 _geom_angle_site_symmetry_3 
 _geom_angle_publ_flag 
C34 C33 C32 111.8(12) . . ? 
C31 C32 C33 117.3(13) . . ? 
C34 C36 C35 119.0(19) . . ? 
C36 C35 C31 116.4(17) . . ? 
C17 Si10 C18 111.9(16) . . ? 
C17 Si10 C16 100.7(14) . . ? 
C18 Si10 C16 104.3(14) . . ? 
C17 Si10 Si9 113.9(11) . . ? 
C18 Si10 Si9 115.4(9) . . ? 
C16 Si10 Si9 109.0(6) . . ? 
C40 Si17 C48 112(2) . . ? 
C40 Si17 C47 87(4) . . ? 
C48 Si17 C47 111(3) . . ? 
C40 Si17 Si9 106.2(16) . . ? 
C48 Si17 Si9 120.8(16) . . ? 
C47 Si17 Si9 115(3) . . ? 
O2 Yb2 O2 78.7(2) . 5_567 ? 
O2 Yb2 C90 94.3(4) . 5_567 ? 
O2 Yb2 C90 108.0(3) 5_567 5_567 ? 
O2 Yb2 Si8 109.94(16) . . ? 
O2 Yb2 Si8 120.12(16) 5_567 . ? 
C90 Yb2 Si8 129.0(2) 5_567 . ? 
O2 Yb2 Yb2 39.38(14) . 5_567 ? 
O2 Yb2 Yb2 39.32(13) 5_567 5_567 ? 
C90 Yb2 Yb2 104.4(2) 5_567 5_567 ? 
Si8 Yb2 Yb2 123.03(8) . 5_567 ? 
O2 Yb1 O2 78.6(2) . 5_567 ? 
O2 Yb1 O1 107.7(3) . . ? 
O2 Yb1 O1 102.1(3) 5_567 . ? 
O2 Yb1 Si8 115.17(15) . . ? 
O2 Yb1 Si8 126.48(15) 5_567 . ? 
O1 Yb1 Si8 119.2(2) . . ? 
O2 Yb1 C90 90.6(4) . . ? 
O2 Yb1 C90 79.6(3) 5_567 . ? 
O1 Yb1 C90 26.0(2) . . ? 
Si8 Yb1 C90 145.1(3) . . ? 
O2 Yb1 Yb1 39.31(14) . 5_567 ? 
O2 Yb1 Yb1 39.28(13) 5_567 5_567 ? 
O1 Yb1 Yb1 109.3(2) . 5_567 ? 
Si8 Yb1 Yb1 131.22(5) . 5_567 ? 
C90 Yb1 Yb1 83.7(3) . 5_567 ? 
C31 O2 Yb2 130.3(6) . . ? 
C31 O2 Yb2 127.8(6) . 5_567 ? 
Yb2 O2 Yb2 101.3(2) . 5_567 ? 
C31 O2 Yb1 123.8(6) . . ? 
Yb2 O2 Yb1 51.33(12) . . ? 
Yb2 O2 Yb1 79.74(18) 5_567 . ? 
C31 O2 Yb1 134.6(6) . 5_567 ? 
Yb2 O2 Yb1 79.77(18) . 5_567 ? 
Yb2 O2 Yb1 51.27(12) 5_567 5_567 ? 
Yb1 O2 Yb1 101.4(2) . 5_567 ? 
C34 Si1 Si3 108.7(4) . . ? 
C34 Si1 Si2 106.9(4) . . ? 
Si3 Si1 Si2 104.54(16) . . ? 
C34 Si1 Si4 103.6(4) . . ? 
Si3 Si1 Si4 116.68(17) . . ? 
Si2 Si1 Si4 115.88(13) . . ? 
C2 Si2 C1 108.5(11) . . ? 
C2 Si2 C3 100.6(13) . . ? 
C1 Si2 C3 109.0(14) . . ? 
C2 Si2 Si1 110.5(5) . . ? 
C1 Si2 Si1 113.0(6) . . ? 
C3 Si2 Si1 114.4(6) . . ? 
C6 Si3 C5 104.7(9) . . ? 
C6 Si3 C4 104.5(9) . . ? 
C5 Si3 C4 113.8(12) . . ? 
C6 Si3 Si1 116.8(5) . . ? 
C5 Si3 Si1 109.7(7) . . ? 
C4 Si3 Si1 107.6(6) . . ? 
Si5 Si4 Si7 108.56(14) . . ? 
Si5 Si4 Si6 106.10(16) . . ? 
Si7 Si4 Si6 104.38(14) . . ? 
Si5 Si4 Si1 115.17(13) . . ? 
Si7 Si4 Si1 112.37(15) . . ? 
Si6 Si4 Si1 109.54(13) . . ? 
C7 Si5 C8 109.7(8) . . ? 
C7 Si5 C9 109.9(9) . . ? 
C8 Si5 C9 104.4(10) . . ? 
C7 Si5 Si4 112.5(5) . . ? 
C8 Si5 Si4 110.1(5) . . ? 
C9 Si5 Si4 110.0(5) . . ? 
C12 Si6 C11 107.6(7) . . ? 
C12 Si6 C10 107.9(7) . . ? 
C11 Si6 C10 107.3(6) . . ? 
C12 Si6 Si4 112.5(5) . . ? 
C11 Si6 Si4 111.4(4) . . ? 
C10 Si6 Si4 109.9(5) . . ? 
C14 Si7 C13 103.3(6) . . ? 
C14 Si7 C15 109.4(6) . . ? 
C13 Si7 C15 108.3(6) . . ? 
C14 Si7 Si4 111.6(5) . . ? 
C13 Si7 Si4 113.4(4) . . ? 
C15 Si7 Si4 110.7(4) . . ? 
Si13 Si8 Si9 112.09(13) . . ? 
Si13 Si8 Si14 98.70(15) . . ? 
Si9 Si8 Si14 107.34(13) . . ? 
Si13 Si8 Yb1 114.15(11) . . ? 
Si9 Si8 Yb1 120.37(11) . . ? 
Si14 Si8 Yb1 100.70(12) . . ? 
Si13 Si8 Yb2 89.42(11) . . ? 
Si9 Si8 Yb2 111.84(11) . . ? 
Si14 Si8 Yb2 133.28(13) . . ? 
Yb1 Si8 Yb2 36.63(4) . . ? 
Si17 Si9 Si11 102.1(5) . . ? 
Si17 Si9 Si12 96.0(3) . . ? 
Si11 Si9 Si12 106.20(18) . . ? 
Si17 Si9 Si8 119.3(5) . . ? 
Si11 Si9 Si8 120.75(13) . . ? 
Si12 Si9 Si8 109.14(13) . . ? 
Si17 Si9 Si10 17.3(2) . . ? 
Si11 Si9 Si10 108.4(2) . . ? 
Si12 Si9 Si10 108.7(4) . . ? 
Si8 Si9 Si10 103.2(3) . . ? 
C21 Si11 C19 106.3(8) . . ? 
C21 Si11 C20 106.2(10) . . ? 
C19 Si11 C20 105.1(7) . . ? 
C21 Si11 Si9 112.9(5) . . ? 
C19 Si11 Si9 111.3(5) . . ? 
C20 Si11 Si9 114.4(5) . . ? 
C23 Si12 C24 108.1(11) . . ? 
C23 Si12 C22 106.0(7) . . ? 
C24 Si12 C22 105.0(8) . . ? 
C23 Si12 Si9 110.9(8) . . ? 
C24 Si12 Si9 111.3(5) . . ? 
C22 Si12 Si9 115.1(4) . . ? 
C27 Si13 C25 107.4(6) . . ? 
C27 Si13 C26 99.7(6) . . ? 
C25 Si13 C26 106.7(9) . . ? 
C27 Si13 Si8 111.7(4) . . ? 
C25 Si13 Si8 121.5(4) . . ? 
C26 Si13 Si8 107.6(5) . . ? 
C29 Si14 C30 105.6(7) . . ? 
C29 Si14 C28 105.9(8) . . ? 
C30 Si14 C28 105.4(8) . . ? 
C29 Si14 Si8 113.6(5) . . ? 
C30 Si14 Si8 109.5(6) . . ? 
C28 Si14 Si8 116.0(5) . . ? 
C32 C31 O2 122.6(12) . . ? 
C32 C31 C35 34.2(10) . . ? 
O2 C31 C35 107.2(10) . . ? 
C33 C34 C36 53.6(11) . . ? 
C33 C34 Si1 125.1(9) . . ? 
C36 C34 Si1 124.6(11) . . ? 
C91 O1 C90 109.1(11) . . ? 
C91 O1 Yb1 141.4(8) . . ? 
C90 O1 Yb1 109.4(8) . . ? 
C93 C90 O1 100.7(11) . . ? 
C93 C90 Yb2 136.5(15) . 5_567 ? 
O1 C90 Yb2 102.2(9) . 5_567 ? 
C93 C90 Yb1 139.7(12) . . ? 
O1 C90 Yb1 44.6(5) . . ? 
Yb2 C90 Yb1 58.9(3) 5_567 . ? 
O1 C91 C92 100.7(12) . . ? 
C92 C93 C90 98.5(17) . . ? 
C93 C92 C91 104.2(18) . . ? 
 
loop_ 
 _geom_torsion_atom_site_label_1 
 _geom_torsion_atom_site_label_2 
 _geom_torsion_atom_site_label_3 
 _geom_torsion_atom_site_label_4 
 _geom_torsion 
 _geom_torsion_site_symmetry_1 
 _geom_torsion_site_symmetry_2 
 _geom_torsion_site_symmetry_3 
 _geom_torsion_site_symmetry_4 
 _geom_torsion_publ_flag 
C34 C33 C32 C31 -176.7(14) . . . . ? 
C34 C36 C35 C31 83(2) . . . . ? 
O2 Yb2 O2 C31 -171.7(10) 5_567 . . . ? 
C90 Yb2 O2 C31 80.8(10) 5_567 . . . ? 
Si8 Yb2 O2 C31 -53.5(9) . . . . ? 
Yb2 Yb2 O2 C31 -171.7(10) 5_567 . . . ? 
O2 Yb2 O2 Yb2 0.0 5_567 . . 5_567 ? 
C90 Yb2 O2 Yb2 -107.5(4) 5_567 . . 5_567 ? 
Si8 Yb2 O2 Yb2 118.16(18) . . . 5_567 ? 
O2 Yb2 O2 Yb1 -66.88(17) 5_567 . . . ? 
C90 Yb2 O2 Yb1 -174.4(4) 5_567 . . . ? 
Si8 Yb2 O2 Yb1 51.28(12) . . . . ? 
Yb2 Yb2 O2 Yb1 -66.88(17) 5_567 . . . ? 
O2 Yb2 O2 Yb1 46.81(13) 5_567 . . 5_567 ? 
C90 Yb2 O2 Yb1 -60.7(4) 5_567 . . 5_567 ? 
Si8 Yb2 O2 Yb1 164.97(10) . . . 5_567 ? 
Yb2 Yb2 O2 Yb1 46.81(13) 5_567 . . 5_567 ? 
O2 Yb1 O2 C31 -175.7(8) 5_567 . . . ? 
O1 Yb1 O2 C31 -76.5(8) . . . . ? 
Si8 Yb1 O2 C31 59.2(7) . . . . ? 
C90 Yb1 O2 C31 -96.5(8) . . . . ? 
Yb1 Yb1 O2 C31 -175.7(8) 5_567 . . . ? 
O2 Yb1 O2 Yb2 66.82(17) 5_567 . . . ? 
O1 Yb1 O2 Yb2 166.0(2) . . . . ? 
Si8 Yb1 O2 Yb2 -58.30(14) . . . . ? 
C90 Yb1 O2 Yb2 146.1(3) . . . . ? 
Yb1 Yb1 O2 Yb2 66.83(17) 5_567 . . . ? 
O2 Yb1 O2 Yb2 -46.76(13) 5_567 . . 5_567 ? 
O1 Yb1 O2 Yb2 52.5(3) . . . 5_567 ? 
Si8 Yb1 O2 Yb2 -171.88(9) . . . 5_567 ? 
C90 Yb1 O2 Yb2 32.5(3) . . . 5_567 ? 
Yb1 Yb1 O2 Yb2 -46.76(13) 5_567 . . 5_567 ? 
O2 Yb1 O2 Yb1 0.0 5_567 . . 5_567 ? 
O1 Yb1 O2 Yb1 99.2(3) . . . 5_567 ? 
Si8 Yb1 O2 Yb1 -125.12(16) . . . 5_567 ? 
C90 Yb1 O2 Yb1 79.3(3) . . . 5_567 ? 
C34 Si1 Si2 C2 -41.6(11) . . . . ? 
Si3 Si1 Si2 C2 73.7(11) . . . . ? 
Si4 Si1 Si2 C2 -156.4(10) . . . . ? 
C34 Si1 Si2 C1 -163.3(11) . . . . ? 
Si3 Si1 Si2 C1 -48.1(11) . . . . ? 
Si4 Si1 Si2 C1 81.8(11) . . . . ? 
C34 Si1 Si2 C3 71.1(13) . . . . ? 
Si3 Si1 Si2 C3 -173.7(13) . . . . ? 
Si4 Si1 Si2 C3 -43.8(13) . . . . ? 
C34 Si1 Si3 C6 -55.9(8) . . . . ? 
Si2 Si1 Si3 C6 -169.8(6) . . . . ? 
Si4 Si1 Si3 C6 60.8(7) . . . . ? 
C34 Si1 Si3 C5 -174.7(10) . . . . ? 
Si2 Si1 Si3 C5 71.4(9) . . . . ? 
Si4 Si1 Si3 C5 -58.0(9) . . . . ? 
C34 Si1 Si3 C4 61.1(9) . . . . ? 
Si2 Si1 Si3 C4 -52.8(8) . . . . ? 
Si4 Si1 Si3 C4 177.7(8) . . . . ? 
C34 Si1 Si4 Si5 -153.3(4) . . . . ? 
Si3 Si1 Si4 Si5 87.2(2) . . . . ? 
Si2 Si1 Si4 Si5 -36.6(2) . . . . ? 
C34 Si1 Si4 Si7 81.6(4) . . . . ? 
Si3 Si1 Si4 Si7 -37.8(2) . . . . ? 
Si2 Si1 Si4 Si7 -161.58(14) . . . . ? 
C34 Si1 Si4 Si6 -33.9(4) . . . . ? 
Si3 Si1 Si4 Si6 -153.32(17) . . . . ? 
Si2 Si1 Si4 Si6 82.89(17) . . . . ? 
Si7 Si4 Si5 C7 -152.9(6) . . . . ? 
Si6 Si4 Si5 C7 -41.2(6) . . . . ? 
Si1 Si4 Si5 C7 80.2(6) . . . . ? 
Si7 Si4 Si5 C8 84.5(7) . . . . ? 
Si6 Si4 Si5 C8 -163.8(7) . . . . ? 
Si1 Si4 Si5 C8 -42.5(7) . . . . ? 
Si7 Si4 Si5 C9 -30.0(9) . . . . ? 
Si6 Si4 Si5 C9 81.7(9) . . . . ? 
Si1 Si4 Si5 C9 -157.0(9) . . . . ? 
Si5 Si4 Si6 C12 -164.7(5) . . . . ? 
Si7 Si4 Si6 C12 -50.1(5) . . . . ? 
Si1 Si4 Si6 C12 70.4(5) . . . . ? 
Si5 Si4 Si6 C11 74.4(5) . . . . ? 
Si7 Si4 Si6 C11 -171.0(5) . . . . ? 
Si1 Si4 Si6 C11 -50.5(5) . . . . ? 
Si5 Si4 Si6 C10 -44.5(5) . . . . ? 
Si7 Si4 Si6 C10 70.1(5) . . . . ? 
Si1 Si4 Si6 C10 -169.4(5) . . . . ? 
Si5 Si4 Si7 C14 70.1(5) . . . . ? 
Si6 Si4 Si7 C14 -42.7(5) . . . . ? 
Si1 Si4 Si7 C14 -161.3(5) . . . . ? 
Si5 Si4 Si7 C13 -173.8(5) . . . . ? 
Si6 Si4 Si7 C13 73.4(5) . . . . ? 
Si1 Si4 Si7 C13 -45.2(5) . . . . ? 
Si5 Si4 Si7 C15 -51.9(5) . . . . ? 
Si6 Si4 Si7 C15 -164.7(5) . . . . ? 
Si1 Si4 Si7 C15 76.7(5) . . . . ? 
O2 Yb1 Si8 Si13 0.7(2) . . . . ? 
O2 Yb1 Si8 Si13 -93.7(2) 5_567 . . . ? 
O1 Yb1 Si8 Si13 130.9(3) . . . . ? 
C90 Yb1 Si8 Si13 134.5(8) . . . . ? 
Yb1 Yb1 Si8 Si13 -42.89(15) 5_567 . . . ? 
O2 Yb1 Si8 Si9 138.44(19) . . . . ? 
O2 Yb1 Si8 Si9 44.1(2) 5_567 . . . ? 
O1 Yb1 Si8 Si9 -91.3(3) . . . . ? 
C90 Yb1 Si8 Si9 -87.7(8) . . . . ? 
Yb1 Yb1 Si8 Si9 94.89(12) 5_567 . . . ? 
O2 Yb1 Si8 Si14 -104.03(19) . . . . ? 
O2 Yb1 Si8 Si14 161.63(19) 5_567 . . . ? 
O1 Yb1 Si8 Si14 26.3(3) . . . . ? 
C90 Yb1 Si8 Si14 29.9(8) . . . . ? 
Yb1 Yb1 Si8 Si14 -147.57(10) 5_567 . . . ? 
O2 Yb1 Si8 Yb2 52.20(16) . . . . ? 
O2 Yb1 Si8 Yb2 -42.14(18) 5_567 . . . ? 
O1 Yb1 Si8 Yb2 -177.5(3) . . . . ? 
C90 Yb1 Si8 Yb2 -173.9(8) . . . . ? 
Yb1 Yb1 Si8 Yb2 8.66(7) 5_567 . . . ? 
O2 Yb2 Si8 Si13 84.77(18) . . . . ? 
O2 Yb2 Si8 Si13 173.02(18) 5_567 . . . ? 
C90 Yb2 Si8 Si13 -28.6(7) 5_567 . . . ? 
Yb2 Yb2 Si8 Si13 126.62(11) 5_567 . . . ? 
O2 Yb2 Si8 Si9 -161.58(18) . . . . ? 
O2 Yb2 Si8 Si9 -73.3(2) 5_567 . . . ? 
C90 Yb2 Si8 Si9 85.0(7) 5_567 . . . ? 
Yb2 Yb2 Si8 Si9 -119.73(12) 5_567 . . . ? 
O2 Yb2 Si8 Si14 -16.7(2) . . . . ? 
O2 Yb2 Si8 Si14 71.6(2) 5_567 . . . ? 
C90 Yb2 Si8 Si14 -130.1(7) 5_567 . . . ? 
Yb2 Yb2 Si8 Si14 25.2(2) 5_567 . . . ? 
O2 Yb2 Si8 Yb1 -49.62(15) . . . . ? 
O2 Yb2 Si8 Yb1 38.63(16) 5_567 . . . ? 
C90 Yb2 Si8 Yb1 -163.0(7) 5_567 . . . ? 
Yb2 Yb2 Si8 Yb1 -7.77(6) 5_567 . . . ? 
C40 Si17 Si9 Si11 165(3) . . . . ? 
C48 Si17 Si9 Si11 36.3(18) . . . . ? 
C47 Si17 Si9 Si11 -100(3) . . . . ? 
C40 Si17 Si9 Si12 57(3) . . . . ? 
C48 Si17 Si9 Si12 -71.7(18) . . . . ? 
C47 Si17 Si9 Si12 152(3) . . . . ? 
C40 Si17 Si9 Si8 -59(3) . . . . ? 
C48 Si17 Si9 Si8 172.4(17) . . . . ? 
C47 Si17 Si9 Si8 36(3) . . . . ? 
C40 Si17 Si9 Si10 -82(4) . . . . ? 
C48 Si17 Si9 Si10 150(3) . . . . ? 
C47 Si17 Si9 Si10 13(3) . . . . ? 
Si13 Si8 Si9 Si17 164.8(4) . . . . ? 
Si14 Si8 Si9 Si17 -87.9(4) . . . . ? 
Yb1 Si8 Si9 Si17 26.2(5) . . . . ? 
Yb2 Si8 Si9 Si17 66.1(4) . . . . ? 
Si13 Si8 Si9 Si11 -67.3(2) . . . . ? 
Si14 Si8 Si9 Si11 40.0(2) . . . . ? 
Yb1 Si8 Si9 Si11 154.11(14) . . . . ? 
Yb2 Si8 Si9 Si11 -166.00(14) . . . . ? 
Si13 Si8 Si9 Si12 56.1(2) . . . . ? 
Si14 Si8 Si9 Si12 163.37(19) . . . . ? 
Yb1 Si8 Si9 Si12 -82.52(19) . . . . ? 
Yb2 Si8 Si9 Si12 -42.62(19) . . . . ? 
Si13 Si8 Si9 Si10 171.5(3) . . . . ? 
Si14 Si8 Si9 Si10 -81.1(3) . . . . ? 
Yb1 Si8 Si9 Si10 33.0(3) . . . . ? 
Yb2 Si8 Si9 Si10 72.9(3) . . . . ? 
C17 Si10 Si9 Si17 38(3) . . . . ? 
C18 Si10 Si9 Si17 -93.2(19) . . . . ? 
C16 Si10 Si9 Si17 150(3) . . . . ? 
C17 Si10 Si9 Si11 109.3(15) . . . . ? 
C18 Si10 Si9 Si11 -22.2(11) . . . . ? 
C16 Si10 Si9 Si11 -139.1(11) . . . . ? 
C17 Si10 Si9 Si12 -5.7(15) . . . . ? 
C18 Si10 Si9 Si12 -137.2(10) . . . . ? 
C16 Si10 Si9 Si12 105.9(11) . . . . ? 
C17 Si10 Si9 Si8 -121.5(15) . . . . ? 
C18 Si10 Si9 Si8 107.0(10) . . . . ? 
C16 Si10 Si9 Si8 -9.9(11) . . . . ? 
Si17 Si9 Si11 C21 -165.7(8) . . . . ? 
Si12 Si9 Si11 C21 -65.7(7) . . . . ? 
Si8 Si9 Si11 C21 59.0(8) . . . . ? 
Si10 Si9 Si11 C21 177.6(8) . . . . ? 
Si17 Si9 Si11 C19 -46.2(6) . . . . ? 
Si12 Si9 Si11 C19 53.8(5) . . . . ? 
Si8 Si9 Si11 C19 178.5(5) . . . . ? 
Si10 Si9 Si11 C19 -62.9(6) . . . . ? 
Si17 Si9 Si11 C20 72.7(8) . . . . ? 
Si12 Si9 Si11 C20 172.7(7) . . . . ? 
Si8 Si9 Si11 C20 -62.6(8) . . . . ? 
Si10 Si9 Si11 C20 56.0(8) . . . . ? 
Si17 Si9 Si12 C23 -82.1(9) . . . . ? 
Si11 Si9 Si12 C23 173.4(7) . . . . ? 
Si8 Si9 Si12 C23 41.8(7) . . . . ? 
Si10 Si9 Si12 C23 -70.1(8) . . . . ? 
Si17 Si9 Si12 C24 157.5(9) . . . . ? 
Si11 Si9 Si12 C24 53.0(7) . . . . ? 
Si8 Si9 Si12 C24 -78.7(7) . . . . ? 
Si10 Si9 Si12 C24 169.4(7) . . . . ? 
Si17 Si9 Si12 C22 38.2(8) . . . . ? 
Si11 Si9 Si12 C22 -66.3(6) . . . . ? 
Si8 Si9 Si12 C22 162.1(6) . . . . ? 
Si10 Si9 Si12 C22 50.2(7) . . . . ? 
Si9 Si8 Si13 C27 163.2(5) . . . . ? 
Si14 Si8 Si13 C27 50.4(5) . . . . ? 
Yb1 Si8 Si13 C27 -55.5(5) . . . . ? 
Yb2 Si8 Si13 C27 -83.4(5) . . . . ? 
Si9 Si8 Si13 C25 34.9(7) . . . . ? 
Si14 Si8 Si13 C25 -77.9(7) . . . . ? 
Yb1 Si8 Si13 C25 176.1(7) . . . . ? 
Yb2 Si8 Si13 C25 148.3(7) . . . . ? 
Si9 Si8 Si13 C26 -88.3(6) . . . . ? 
Si14 Si8 Si13 C26 158.9(6) . . . . ? 
Yb1 Si8 Si13 C26 52.9(6) . . . . ? 
Yb2 Si8 Si13 C26 25.1(6) . . . . ? 
Si13 Si8 Si14 C29 164.1(6) . . . . ? 
Si9 Si8 Si14 C29 47.6(6) . . . . ? 
Yb1 Si8 Si14 C29 -79.1(6) . . . . ? 
Yb2 Si8 Si14 C29 -98.4(6) . . . . ? 
Si13 Si8 Si14 C30 -78.1(6) . . . . ? 
Si9 Si8 Si14 C30 165.4(6) . . . . ? 
Yb1 Si8 Si14 C30 38.7(6) . . . . ? 
Yb2 Si8 Si14 C30 19.4(7) . . . . ? 
Si13 Si8 Si14 C28 41.0(5) . . . . ? 
Si9 Si8 Si14 C28 -75.5(5) . . . . ? 
Yb1 Si8 Si14 C28 157.8(5) . . . . ? 
Yb2 Si8 Si14 C28 138.5(5) . . . . ? 
C33 C32 C31 O2 -179.2(11) . . . . ? 
C33 C32 C31 C35 109(2) . . . . ? 
Yb2 O2 C31 C32 104.8(14) . . . . ? 
Yb2 O2 C31 C32 -64.9(15) 5_567 . . . ? 
Yb1 O2 C31 C32 39.5(15) . . . . ? 
Yb1 O2 C31 C32 -134.6(12) 5_567 . . . ? 
Yb2 O2 C31 C35 138.7(10) . . . . ? 
Yb2 O2 C31 C35 -30.9(14) 5_567 . . . ? 
Yb1 O2 C31 C35 73.4(11) . . . . ? 
Yb1 O2 C31 C35 -100.7(13) 5_567 . . . ? 
C36 C35 C31 C32 -60(2) . . . . ? 
C36 C35 C31 O2 176.8(17) . . . . ? 
C32 C33 C34 C36 67.4(16) . . . . ? 
C32 C33 C34 Si1 177.5(10) . . . . ? 
C35 C36 C34 C33 -68.1(19) . . . . ? 
C35 C36 C34 Si1 -179.3(15) . . . . ? 
Si3 Si1 C34 C33 -31.2(14) . . . . ? 
Si2 Si1 C34 C33 81.1(13) . . . . ? 
Si4 Si1 C34 C33 -156.0(12) . . . . ? 
Si3 Si1 C34 C36 35.5(16) . . . . ? 
Si2 Si1 C34 C36 147.9(14) . . . . ? 
Si4 Si1 C34 C36 -89.2(15) . . . . ? 
O2 Yb1 O1 C91 134(4) . . . . ? 
O2 Yb1 O1 C91 -145(4) 5_567 . . . ? 
Si8 Yb1 O1 C91 0(4) . . . . ? 
C90 Yb1 O1 C91 -175(4) . . . . ? 
Yb1 Yb1 O1 C91 175(4) 5_567 . . . ? 
O2 Yb1 O1 C90 -51.1(12) . . . . ? 
O2 Yb1 O1 C90 30.6(12) 5_567 . . . ? 
Si8 Yb1 O1 C90 175.3(11) . . . . ? 
Yb1 Yb1 O1 C90 -9.6(12) 5_567 . . . ? 
C91 O1 C90 C93 -27(3) . . . . ? 
Yb1 O1 C90 C93 156.2(13) . . . . ? 
C91 O1 C90 Yb2 -170(3) . . . 5_567 ? 
Yb1 O1 C90 Yb2 13.4(12) . . . 5_567 ? 
C91 O1 C90 Yb1 177(3) . . . . ? 
O2 Yb1 C90 C93 94(2) . . . . ? 
O2 Yb1 C90 C93 173(2) 5_567 . . . ? 
O1 Yb1 C90 C93 -37.9(17) . . . . ? 
Si8 Yb1 C90 C93 -45(3) . . . . ? 
Yb1 Yb1 C90 C93 133(2) 5_567 . . . ? 
O2 Yb1 C90 O1 132.1(11) . . . . ? 
O2 Yb1 C90 O1 -149.6(11) 5_567 . . . ? 
Si8 Yb1 C90 O1 -7.2(16) . . . . ? 
Yb1 Yb1 C90 O1 170.9(11) 5_567 . . . ? 
O2 Yb1 C90 Yb2 -32.5(4) . . . 5_567 ? 
O2 Yb1 C90 Yb2 45.8(3) 5_567 . . 5_567 ? 
O1 Yb1 C90 Yb2 -164.6(14) . . . 5_567 ? 
Si8 Yb1 C90 Yb2 -171.8(3) . . . 5_567 ? 
Yb1 Yb1 C90 Yb2 6.3(3) 5_567 . . 5_567 ? 
C90 O1 C91 C92 -4(4) . . . . ? 
Yb1 O1 C91 C92 171.4(19) . . . . ? 
O1 C90 C93 C92 46(2) . . . . ? 
Yb2 C90 C93 C92 166.8(17) 5_567 . . . ? 
Yb1 C90 C93 C92 72(3) . . . . ? 
C90 C93 C92 C91 -51(3) . . . . ? 
O1 C91 C92 C93 34(4) . . . . ? 
 
_diffrn_measured_fraction_theta_max    0.995 
_diffrn_reflns_theta_full              26.39 
_diffrn_measured_fraction_theta_full   0.995 
_refine_diff_density_max    2.643 
_refine_diff_density_min   -0.734 
_refine_diff_density_rms    0.163 

# SQUEEZE RESULTS (APPEND TO CIF)
# Note: Data are Listed for all Voids in the P1 Unit Cell
# i.e. Centre of Gravity, Solvent Accessible Volume,
# Recovered number of Electrons in the Void and
# Details about the Squeezed Material
loop_
  _platon_squeeze_void_nr
  _platon_squeeze_void_average_x
  _platon_squeeze_void_average_y
  _platon_squeeze_void_average_z
  _platon_squeeze_void_volume
  _platon_squeeze_void_count_electrons
  _platon_squeeze_void_content
   1  0.105  0.552  0.361        37         5 ' '
   2  0.105  0.948  0.861        37         4 ' '
   3  0.395  0.052  0.361        37         4 ' '
   4  0.395  0.448  0.861        37         4 ' '
   5  0.605  0.552  0.139        37         4 ' '
   6  0.605  0.948  0.639        37         4 ' '
   7  0.895  0.052  0.139        37         4 ' '
   8  0.895  0.448  0.639        37         3 ' '


_platon_squeeze_details
;
;
# start Validation Reply Form
_vrf_PLAT213_1218j
;
PROBLEM: Atom C40 has ADP max/min Ratio ..... 5.8 prolat
RESPONSE: Disordered atom, disorder solved properly with part instructions
;
_vrf_PLAT216_1218j
;
PROBLEM: Disordered C91 (An/Solv) ADP max/min Ratio 9.7 Note
RESPONSE: Disordered atom, disorder solved properly with part instructions
;
_vrf_PLAT410_1218j
;
PROBLEM: Short Intra H...H Contact H31D .. H32B .. 1.55 Ang.
RESPONSE: Disorder, hydrogen atoms belong to different PART instructions
;
# end Validation Reply Form
#===END
data_7_1194j
 
_audit_creation_method            SHELXL-97
_chemical_name_systematic
;
 ?
;
_chemical_name_common             ?
_chemical_melting_point           ?
_chemical_formula_moiety          ?
_chemical_formula_sum
 'C22 H66 O Si10'
_chemical_formula_weight          627.65
 
loop_
 _atom_type_symbol
 _atom_type_description
 _atom_type_scat_dispersion_real
 _atom_type_scat_dispersion_imag
 _atom_type_scat_source
 'C'  'C'   0.0033   0.0016
 'International Tables Vol C Tables 4.2.6.8 and 6.1.1.4'
 'H'  'H'   0.0000   0.0000
 'International Tables Vol C Tables 4.2.6.8 and 6.1.1.4'
 'O'  'O'   0.0106   0.0060
 'International Tables Vol C Tables 4.2.6.8 and 6.1.1.4'
 'Si'  'Si'   0.0817   0.0704
 'International Tables Vol C Tables 4.2.6.8 and 6.1.1.4'
 
_symmetry_cell_setting            monoclinic
_symmetry_space_group_name_H-M    P2(1)
 
loop_
 _symmetry_equiv_pos_as_xyz
 'x, y, z'
 '-x, y+1/2, -z'
 
_cell_length_a                    9.3913(17)
_cell_length_b                    13.142(3)
_cell_length_c                    16.586(3)
_cell_angle_alpha                 90.00
_cell_angle_beta                  93.003(3)
_cell_angle_gamma                 90.00
_cell_volume                      2044.2(7)
_cell_formula_units_Z             2
_cell_measurement_temperature     100(2)
_cell_measurement_reflns_used     3521
_cell_measurement_theta_min       4.903
_cell_measurement_theta_max       50.855
 
_exptl_crystal_description        plates
_exptl_crystal_colour             colorless
_exptl_crystal_size_max           0.40
_exptl_crystal_size_mid           0.23
_exptl_crystal_size_min           0.20
_exptl_crystal_density_meas       ?
_exptl_crystal_density_diffrn     1.020
_exptl_crystal_density_method     'not measured'
_exptl_crystal_F_000              692
_exptl_absorpt_coefficient_mu     0.335
_exptl_absorpt_correction_type    multi-scan
_exptl_absorpt_correction_T_min   0.8776
_exptl_absorpt_correction_T_max   0.9360
_exptl_absorpt_process_details    SADABS
 
_exptl_special_details
;
 ?
;
 
_diffrn_ambient_temperature       100(2)
_diffrn_radiation_wavelength      0.71073
_diffrn_radiation_type            MoK\a
_diffrn_radiation_source          'fine-focus sealed tube'
_diffrn_radiation_monochromator   graphite
_diffrn_measurement_device_type   'SMART APEX'
_diffrn_measurement_method        '\w scans'
_diffrn_detector_area_resol_mean  ?
_diffrn_standards_number          ?
_diffrn_standards_interval_count  ?
_diffrn_standards_interval_time   ?
_diffrn_standards_decay_%         ?
_diffrn_reflns_number             16479
_diffrn_reflns_av_R_equivalents   0.0645
_diffrn_reflns_av_sigmaI/netI     0.0880
_diffrn_reflns_limit_h_min        -11
_diffrn_reflns_limit_h_max        11
_diffrn_reflns_limit_k_min        -16
_diffrn_reflns_limit_k_max        16
_diffrn_reflns_limit_l_min        -20
_diffrn_reflns_limit_l_max        20
_diffrn_reflns_theta_min          1.23
_diffrn_reflns_theta_max          26.34
_reflns_number_total              8261
_reflns_number_gt                 6808
_reflns_threshold_expression      >2sigma(I)
 
_computing_data_collection        'Bruker XSCANS' 
_computing_cell_refinement        'Bruker XSCANS' 
_computing_data_reduction         'Bruker SHELXTL' 
_computing_structure_solution     'SHELXS-97 (Sheldrick, 1990)' 
_computing_structure_refinement   'SHELXL-97 (Sheldrick, 1997)' 
_computing_molecular_graphics     'Bruker SHELXTL' 
_computing_publication_material   'Bruker SHELXTL'
 
_refine_special_details
;
 Refinement of F^2^ against ALL reflections.  The weighted R-factor wR and
 goodness of fit S are based on F^2^, conventional R-factors R are based
 on F, with F set to zero for negative F^2^. The threshold expression of
 F^2^ > 2sigma(F^2^) is used only for calculating R-factors(gt) etc. and is
 not relevant to the choice of reflections for refinement.  R-factors based
 on F^2^ are statistically about twice as large as those based on F, and R-
 factors based on ALL data will be even larger.
;
 
_refine_ls_structure_factor_coef  Fsqd
_refine_ls_matrix_type            full
_refine_ls_weighting_scheme       calc
_refine_ls_weighting_details
 'calc w=1/[\s^2^(Fo^2^)+(0.0454P)^2^+3.3004P] where P=(Fo^2^+2Fc^2^)/3'
_atom_sites_solution_primary      direct
_atom_sites_solution_secondary    difmap
_atom_sites_solution_hydrogens    geom
_refine_ls_hydrogen_treatment     constr
_refine_ls_extinction_method      none
_refine_ls_extinction_coef        ?
_refine_ls_abs_structure_details
 'Flack H D (1983), Acta Cryst. A39, 876-881'
_refine_ls_abs_structure_Flack    0.4(3)
_refine_ls_number_reflns          8261
_refine_ls_number_parameters      545
_refine_ls_number_restraints      113
_refine_ls_R_factor_all           0.0949
_refine_ls_R_factor_gt            0.0787
_refine_ls_wR_factor_ref          0.1727
_refine_ls_wR_factor_gt           0.1620
_refine_ls_goodness_of_fit_ref    1.081
_refine_ls_restrained_S_all       1.083
_refine_ls_shift/su_max           0.001
_refine_ls_shift/su_mean          0.000
 
loop_
 _atom_site_label
 _atom_site_type_symbol
 _atom_site_fract_x
 _atom_site_fract_y
 _atom_site_fract_z
 _atom_site_U_iso_or_equiv
 _atom_site_adp_type
 _atom_site_occupancy
 _atom_site_symmetry_multiplicity
 _atom_site_calc_flag
 _atom_site_refinement_flags
 _atom_site_disorder_assembly
 _atom_site_disorder_group
O1 O 0.7189(8) 0.0196(6) 0.2444(4) 0.0090(14) Uani 0.538(2) 1 d PU A 1
Si3 Si 0.5898(3) 0.3134(3) 0.12587(15) 0.0181(6) Uani 0.538(2) 1 d P A 1
C4 C 0.6544(11) 0.4505(7) 0.1195(7) 0.022(2) Uani 0.538(2) 1 d P A 1
H4A H 0.6876 0.4635 0.0655 0.032 Uiso 0.538(2) 1 calc PR A 1
H4B H 0.7329 0.4616 0.1598 0.032 Uiso 0.538(2) 1 calc PR A 1
H4C H 0.5757 0.4969 0.1301 0.032 Uiso 0.538(2) 1 calc PR A 1
C5 C 0.4433(15) 0.2931(10) 0.0478(8) 0.024(3) Uani 0.538(2) 1 d PU A 1
H5A H 0.3718 0.3470 0.0518 0.035 Uiso 0.538(2) 1 calc PR A 1
H5B H 0.3987 0.2268 0.0563 0.035 Uiso 0.538(2) 1 calc PR A 1
H5C H 0.4820 0.2949 -0.0059 0.035 Uiso 0.538(2) 1 calc PR A 1
C6 C 0.5086(10) 0.2936(10) 0.2281(6) 0.025(2) Uani 0.538(2) 1 d P A 1
H6A H 0.4397 0.3479 0.2371 0.037 Uiso 0.538(2) 1 calc PR A 1
H6B H 0.5844 0.2953 0.2711 0.037 Uiso 0.538(2) 1 calc PR A 1
H6C H 0.4602 0.2276 0.2286 0.037 Uiso 0.538(2) 1 calc PR A 1
Si4 Si 0.9816(3) 0.2506(2) 0.18678(15) 0.0178(6) Uani 0.538(2) 1 d PD A 1
C7 C 1.0632(15) 0.3664(6) 0.1479(9) 0.036(3) Uani 0.538(2) 1 d PDU A 1
H7A H 0.9950 0.4227 0.1493 0.053 Uiso 0.538(2) 1 calc PR A 1
H7B H 1.0891 0.3549 0.0921 0.053 Uiso 0.538(2) 1 calc PR A 1
H7C H 1.1489 0.3832 0.1814 0.053 Uiso 0.538(2) 1 calc PR A 1
C8 C 0.9263(16) 0.2819(12) 0.2921(7) 0.038(3) Uani 0.538(2) 1 d P A 1
H8A H 1.0112 0.2980 0.3267 0.057 Uiso 0.538(2) 1 calc PR A 1
H8B H 0.8772 0.2233 0.3144 0.057 Uiso 0.538(2) 1 calc PR A 1
H8C H 0.8621 0.3407 0.2898 0.057 Uiso 0.538(2) 1 calc PR A 1
C9 C 1.1179(12) 0.1450(9) 0.1916(6) 0.029(3) Uani 0.538(2) 1 d P A 1
H9A H 1.1558 0.1355 0.1382 0.043 Uiso 0.538(2) 1 calc PR A 1
H9B H 1.0728 0.0818 0.2086 0.043 Uiso 0.538(2) 1 calc PR A 1
H9C H 1.1959 0.1630 0.2306 0.043 Uiso 0.538(2) 1 calc PR A 1
Si5 Si 0.7087(2) 0.03129(18) 0.14659(13) 0.0091(5) Uani 0.538(2) 1 d PDU A 1
C10 C 0.8368(19) -0.0571(13) 0.1012(9) 0.021(4) Uani 0.538(2) 1 d PU A 1
H10A H 0.9335 -0.0425 0.1233 0.032 Uiso 0.538(2) 1 calc PR A 1
H10B H 0.8328 -0.0479 0.0425 0.032 Uiso 0.538(2) 1 calc PR A 1
H10C H 0.8116 -0.1274 0.1139 0.032 Uiso 0.538(2) 1 calc PR A 1
C11 C 0.5252(10) 0.0093(7) 0.1067(5) 0.0110(17) Uani 0.538(2) 1 d PU A 1
H11A H 0.5030 -0.0634 0.1096 0.017 Uiso 0.538(2) 1 calc PR A 1
H11B H 0.5156 0.0319 0.0504 0.017 Uiso 0.538(2) 1 calc PR A 1
H11C H 0.4589 0.0477 0.1388 0.017 Uiso 0.538(2) 1 calc PR A 1
Si6 Si 0.6414(3) -0.0059(2) 0.32876(13) 0.0066(5) Uani 0.538(2) 1 d PDU A 1
C12 C 0.6639(13) 0.1037(7) 0.3969(6) 0.0075(19) Uani 0.538(2) 1 d PDU A 1
H12A H 0.7658 0.1174 0.4074 0.011 Uiso 0.538(2) 1 calc PR A 1
H12B H 0.6202 0.0886 0.4479 0.011 Uiso 0.538(2) 1 calc PR A 1
H12C H 0.6178 0.1635 0.3718 0.011 Uiso 0.538(2) 1 calc PR A 1
C13 C 0.4434(9) -0.0253(7) 0.3072(5) 0.0145(18) Uani 0.538(2) 1 d PU A 1
H13A H 0.4008 0.0378 0.2856 0.022 Uiso 0.538(2) 1 calc PR A 1
H13B H 0.3987 -0.0437 0.3572 0.022 Uiso 0.538(2) 1 calc PR A 1
H13C H 0.4281 -0.0800 0.2675 0.022 Uiso 0.538(2) 1 calc PR A 1
Si8 Si 0.6520(3) -0.2987(2) 0.32741(15) 0.0144(6) Uani 0.538(2) 1 d P A 1
C14 C 0.6553(12) -0.2813(9) 0.2147(5) 0.025(2) Uani 0.538(2) 1 d P A 1
H14A H 0.6148 -0.3416 0.1874 0.037 Uiso 0.538(2) 1 calc PR A 1
H14B H 0.7540 -0.2719 0.1996 0.037 Uiso 0.538(2) 1 calc PR A 1
H14C H 0.5989 -0.2212 0.1985 0.037 Uiso 0.538(2) 1 calc PR A 1
C15 C 0.4562(15) -0.3236(10) 0.3601(12) 0.039(5) Uani 0.538(2) 1 d P A 1
H15A H 0.4263 -0.3922 0.3435 0.058 Uiso 0.538(2) 1 calc PR A 1
H15B H 0.3916 -0.2735 0.3341 0.058 Uiso 0.538(2) 1 calc PR A 1
H15C H 0.4535 -0.3173 0.4189 0.058 Uiso 0.538(2) 1 calc PR A 1
C16 C 0.7684(13) -0.4129(9) 0.3553(7) 0.034(3) Uani 0.538(2) 1 d PU A 1
H16A H 0.7683 -0.4246 0.4136 0.051 Uiso 0.538(2) 1 calc PR A 1
H16B H 0.8661 -0.3999 0.3399 0.051 Uiso 0.538(2) 1 calc PR A 1
H16C H 0.7309 -0.4733 0.3267 0.051 Uiso 0.538(2) 1 calc PR A 1
Si10 Si 0.9899(2) -0.1473(3) 0.38942(12) 0.0125(5) Uani 0.538(2) 1 d P A 1
C20 C 1.0717(11) -0.2382(9) 0.4686(6) 0.019(2) Uani 0.538(2) 1 d PU A 1
H20A H 1.1745 -0.2438 0.4619 0.028 Uiso 0.538(2) 1 calc PR A 1
H20B H 1.0275 -0.3054 0.4619 0.028 Uiso 0.538(2) 1 calc PR A 1
H20C H 1.0553 -0.2120 0.5226 0.028 Uiso 0.538(2) 1 calc PR A 1
C21 C 1.0563(11) -0.0143(8) 0.4129(5) 0.019(2) Uani 0.538(2) 1 d PU A 1
H21A H 1.0306 0.0049 0.4674 0.028 Uiso 0.538(2) 1 calc PR A 1
H21B H 1.0127 0.0335 0.3736 0.028 Uiso 0.538(2) 1 calc PR A 1
H21C H 1.1603 -0.0123 0.4100 0.028 Uiso 0.538(2) 1 calc PR A 1
C22 C 1.0480(10) -0.1811(8) 0.2865(5) 0.019(2) Uani 0.538(2) 1 d P A 1
H22A H 0.9947 -0.1400 0.2459 0.028 Uiso 0.538(2) 1 calc PR A 1
H22B H 1.0293 -0.2534 0.2760 0.028 Uiso 0.538(2) 1 calc PR A 1
H22C H 1.1502 -0.1676 0.2837 0.028 Uiso 0.538(2) 1 calc PR A 1
O11 O 0.7813(11) 0.0070(9) 0.2540(7) 0.045(3) Uani 0.462(2) 1 d P A 2
Si33 Si 0.5123(5) 0.1739(3) 0.1111(3) 0.0562(14) Uani 0.462(2) 1 d PD A 2
C30 C 0.4481(17) 0.0453(17) 0.0899(14) 0.086(7) Uani 0.462(2) 1 d P A 2
H30A H 0.3478 0.0479 0.0706 0.129 Uiso 0.462(2) 1 calc PR A 2
H30B H 0.4573 0.0044 0.1393 0.129 Uiso 0.462(2) 1 calc PR A 2
H30C H 0.5048 0.0145 0.0484 0.129 Uiso 0.462(2) 1 calc PR A 2
C31 C 0.453(2) 0.2161(17) 0.2119(13) 0.078(7) Uani 0.462(2) 1 d P A 2
H31A H 0.4839 0.2865 0.2219 0.117 Uiso 0.462(2) 1 calc PR A 2
H31B H 0.4963 0.1719 0.2541 0.117 Uiso 0.462(2) 1 calc PR A 2
H31C H 0.3493 0.2120 0.2124 0.117 Uiso 0.462(2) 1 calc PR A 2
C32 C 0.4242(18) 0.2580(14) 0.0355(11) 0.052(5) Uani 0.462(2) 1 d PD A 2
H32A H 0.4623 0.2450 -0.0174 0.078 Uiso 0.462(2) 1 calc PR A 2
H32B H 0.4419 0.3291 0.0508 0.078 Uiso 0.462(2) 1 calc PR A 2
H32C H 0.3213 0.2449 0.0328 0.078 Uiso 0.462(2) 1 calc PR A 2
Si44 Si 0.8496(5) 0.3274(3) 0.1731(4) 0.075(2) Uani 0.462(2) 1 d PD A 2
C33 C 0.7433(14) 0.4386(8) 0.1402(12) 0.058(6) Uani 0.462(2) 1 d PD A 2
H33A H 0.6452 0.4303 0.1566 0.087 Uiso 0.462(2) 1 calc PR A 2
H33B H 0.7431 0.4447 0.0813 0.087 Uiso 0.462(2) 1 calc PR A 2
H33C H 0.7848 0.5001 0.1652 0.087 Uiso 0.462(2) 1 calc PR A 2
C34 C 1.0297(12) 0.351(2) 0.1392(15) 0.081(8) Uani 0.462(2) 1 d PDU A 2
H34A H 1.0803 0.3975 0.1768 0.122 Uiso 0.462(2) 1 calc PR A 2
H34B H 1.0231 0.3810 0.0851 0.122 Uiso 0.462(2) 1 calc PR A 2
H34C H 1.0818 0.2862 0.1376 0.122 Uiso 0.462(2) 1 calc PR A 2
C35 C 0.858(3) 0.3132(14) 0.2834(4) 0.080(8) Uani 0.462(2) 1 d PD A 2
H35A H 0.8832 0.3786 0.3086 0.121 Uiso 0.462(2) 1 calc PR A 2
H35B H 0.9303 0.2623 0.2995 0.121 Uiso 0.462(2) 1 calc PR A 2
H35C H 0.7648 0.2910 0.3009 0.121 Uiso 0.462(2) 1 calc PR A 2
Si55 Si 0.8579(5) 0.0330(3) 0.1726(4) 0.0600(15) Uani 0.462(2) 1 d PD A 2
C36 C 0.833(4) -0.0726(16) 0.1007(15) 0.059(10) Uani 0.462(2) 1 d PDU A 2
H36A H 0.8492 -0.1373 0.1290 0.089 Uiso 0.462(2) 1 calc PR A 2
H36B H 0.9007 -0.0658 0.0581 0.089 Uiso 0.462(2) 1 calc PR A 2
H36C H 0.7354 -0.0710 0.0766 0.089 Uiso 0.462(2) 1 calc PR A 2
C37 C 1.0538(15) 0.0515(12) 0.1964(12) 0.062(6) Uani 0.462(2) 1 d P A 2
H37A H 1.0678 0.1051 0.2371 0.093 Uiso 0.462(2) 1 calc PR A 2
H37B H 1.1003 0.0712 0.1473 0.093 Uiso 0.462(2) 1 calc PR A 2
H37C H 1.0955 -0.0122 0.2174 0.093 Uiso 0.462(2) 1 calc PR A 2
Si66 Si 0.7876(4) -0.0132(3) 0.3536(3) 0.0465(12) Uani 0.462(2) 1 d PD A 2
C38 C 0.9767(19) 0.0182(15) 0.3983(13) 0.072(6) Uani 0.462(2) 1 d P A 2
H38A H 1.0421 -0.0369 0.3855 0.108 Uiso 0.462(2) 1 calc PR A 2
H38B H 0.9743 0.0253 0.4571 0.108 Uiso 0.462(2) 1 calc PR A 2
H38C H 1.0095 0.0821 0.3751 0.108 Uiso 0.462(2) 1 calc PR A 2
C45 C 0.675(2) 0.0854(15) 0.3957(16) 0.082(9) Uani 0.462(2) 1 d PD A 2
H45A H 0.7117 0.1528 0.3826 0.122 Uiso 0.462(2) 1 calc PR A 2
H45B H 0.6746 0.0776 0.4544 0.122 Uiso 0.462(2) 1 calc PR A 2
H45C H 0.5769 0.0786 0.3725 0.122 Uiso 0.462(2) 1 calc PR A 2
Si88 Si 0.5195(4) -0.2223(3) 0.3118(3) 0.0522(13) Uani 0.462(2) 1 d PD A 2
C42 C 0.5636(17) -0.2454(13) 0.2061(10) 0.052(5) Uani 0.462(2) 1 d P A 2
H42A H 0.4759 -0.2590 0.1733 0.079 Uiso 0.462(2) 1 calc PR A 2
H42B H 0.6275 -0.3042 0.2039 0.079 Uiso 0.462(2) 1 calc PR A 2
H42C H 0.6109 -0.1852 0.1851 0.079 Uiso 0.462(2) 1 calc PR A 2
C43 C 0.3840(17) -0.1205(12) 0.3080(13) 0.070(6) Uani 0.462(2) 1 d P A 2
H43A H 0.2934 -0.1476 0.2852 0.105 Uiso 0.462(2) 1 calc PR A 2
H43B H 0.4156 -0.0647 0.2740 0.105 Uiso 0.462(2) 1 calc PR A 2
H43C H 0.3712 -0.0951 0.3627 0.105 Uiso 0.462(2) 1 calc PR A 2
C44 C 0.446(3) -0.3431(9) 0.3464(14) 0.040(6) Uani 0.462(2) 1 d PDU A 2
H44A H 0.3919 -0.3311 0.3944 0.060 Uiso 0.462(2) 1 calc PR A 2
H44B H 0.5241 -0.3907 0.3597 0.060 Uiso 0.462(2) 1 calc PR A 2
H44C H 0.3828 -0.3722 0.3035 0.060 Uiso 0.462(2) 1 calc PR A 2
Si11 Si 0.9117(4) -0.2874(4) 0.3723(3) 0.0442(11) Uani 0.462(2) 1 d P A 2
C39 C 0.985(2) -0.2687(12) 0.2739(12) 0.067(6) Uani 0.462(2) 1 d P A 2
H39A H 1.0672 -0.3134 0.2688 0.100 Uiso 0.462(2) 1 calc PR A 2
H39B H 1.0143 -0.1976 0.2684 0.100 Uiso 0.462(2) 1 calc PR A 2
H39C H 0.9117 -0.2850 0.2314 0.100 Uiso 0.462(2) 1 calc PR A 2
C40 C 0.850(2) -0.4176(15) 0.3713(12) 0.067(5) Uani 0.462(2) 1 d PU A 2
H40A H 0.7815 -0.4277 0.3255 0.101 Uiso 0.462(2) 1 calc PR A 2
H40B H 0.8047 -0.4324 0.4217 0.101 Uiso 0.462(2) 1 calc PR A 2
H40C H 0.9317 -0.4634 0.3659 0.101 Uiso 0.462(2) 1 calc PR A 2
C41 C 1.0558(16) -0.2694(12) 0.4514(8) 0.028(3) Uani 0.462(2) 1 d PU A 2
H41A H 1.1356 -0.3146 0.4408 0.042 Uiso 0.462(2) 1 calc PR A 2
H41B H 1.0197 -0.2855 0.5043 0.042 Uiso 0.462(2) 1 calc PR A 2
H41C H 1.0883 -0.1986 0.4511 0.042 Uiso 0.462(2) 1 calc PR A 2
Si1 Si 0.77401(17) 0.19703(18) 0.10936(10) 0.0345(4) Uani 1 1 d D . .
Si2 Si 0.82819(19) 0.1919(2) -0.02778(11) 0.0430(5) Uani 1 1 d . A .
Si7 Si 0.73468(16) -0.15655(19) 0.39101(9) 0.0297(4) Uani 1 1 d . . .
Si9 Si 0.67285(17) -0.1572(2) 0.52580(10) 0.0366(4) Uani 1 1 d . A .
C1 C 0.8049(8) 0.3255(8) -0.0696(5) 0.069(3) Uani 1 1 d . . .
H1A H 0.8720 0.3715 -0.0407 0.104 Uiso 1 1 calc R A .
H1B H 0.7071 0.3486 -0.0625 0.104 Uiso 1 1 calc R . .
H1C H 0.8235 0.3255 -0.1272 0.104 Uiso 1 1 calc R . .
C2 C 0.7069(9) 0.1064(8) -0.0891(4) 0.067(3) Uani 1 1 d . . .
H2A H 0.7291 0.1111 -0.1461 0.100 Uiso 1 1 calc R A .
H2B H 0.6077 0.1271 -0.0830 0.100 Uiso 1 1 calc R . .
H2C H 0.7200 0.0361 -0.0705 0.100 Uiso 1 1 calc R . .
C3 C 1.0152(7) 0.1502(6) -0.0409(4) 0.0433(17) Uani 1 1 d . . .
H3A H 1.0238 0.0772 -0.0294 0.065 Uiso 1 1 calc R A .
H3B H 1.0799 0.1882 -0.0037 0.065 Uiso 1 1 calc R . .
H3C H 1.0403 0.1632 -0.0966 0.065 Uiso 1 1 calc R . .
C17 C 0.4806(7) -0.1196(6) 0.5350(4) 0.0454(19) Uani 1 1 d . . .
H17A H 0.4185 -0.1755 0.5159 0.068 Uiso 1 1 calc R A .
H17B H 0.4597 -0.0588 0.5022 0.068 Uiso 1 1 calc R . .
H17C H 0.4637 -0.1049 0.5916 0.068 Uiso 1 1 calc R . .
C18 C 0.6976(7) -0.2870(6) 0.5700(4) 0.0440(18) Uani 1 1 d . . .
H18A H 0.7970 -0.3084 0.5658 0.066 Uiso 1 1 calc R A .
H18B H 0.6346 -0.3351 0.5404 0.066 Uiso 1 1 calc R . .
H18C H 0.6744 -0.2858 0.6269 0.066 Uiso 1 1 calc R . .
C19 C 0.7875(8) -0.0637(7) 0.5862(4) 0.054(2) Uani 1 1 d . . .
H19A H 0.7596 -0.0634 0.6423 0.081 Uiso 1 1 calc R A .
H19B H 0.7747 0.0045 0.5631 0.081 Uiso 1 1 calc R . .
H19C H 0.8879 -0.0837 0.5845 0.081 Uiso 1 1 calc R . .
 
loop_
 _atom_site_aniso_label
 _atom_site_aniso_U_11
 _atom_site_aniso_U_22
 _atom_site_aniso_U_33
 _atom_site_aniso_U_23
 _atom_site_aniso_U_13
 _atom_site_aniso_U_12
O1 0.0089(16) 0.0100(16) 0.0080(16) -0.0007(10) 0.0002(10) 0.0004(10)
Si3 0.0142(13) 0.0259(14) 0.0139(12) 0.0074(10) -0.0025(10) 0.0027(11)
C4 0.019(5) 0.006(4) 0.040(6) 0.009(4) 0.003(4) 0.002(4)
C5 0.024(3) 0.024(3) 0.023(3) 0.0004(10) 0.0011(10) 0.0005(10)
C6 0.006(5) 0.055(7) 0.014(4) 0.008(5) 0.007(4) 0.010(5)
Si4 0.0152(13) 0.0254(14) 0.0122(11) 0.0004(11) -0.0055(9) -0.0075(11)
C7 0.035(3) 0.036(3) 0.036(3) 0.0003(10) 0.0020(10) -0.0006(10)
C8 0.043(9) 0.044(9) 0.026(6) -0.012(6) -0.010(5) -0.008(7)
C9 0.028(6) 0.040(6) 0.017(5) -0.004(4) -0.007(4) 0.018(5)
Si5 0.0108(8) 0.0124(8) 0.0041(7) 0.0008(7) -0.0010(6) 0.0003(7)
C10 0.021(4) 0.021(4) 0.021(4) -0.0003(10) 0.0019(10) 0.0003(10)
C11 0.0113(19) 0.0115(19) 0.0102(18) -0.0001(10) 0.0001(10) -0.0012(10)
Si6 0.0073(8) 0.0087(8) 0.0038(8) 0.0004(6) 0.0009(6) -0.0016(7)
C12 0.007(2) 0.007(2) 0.008(2) -0.0007(10) 0.0008(10) 0.0005(10)
C13 0.014(2) 0.015(2) 0.014(2) 0.0007(10) 0.0005(10) 0.0007(10)
Si8 0.0153(13) 0.0119(12) 0.0156(12) -0.0003(10) -0.0033(9) -0.0051(11)
C14 0.026(6) 0.029(6) 0.020(5) -0.005(4) -0.007(4) -0.003(5)
C15 0.013(5) 0.007(5) 0.095(13) -0.020(7) -0.018(6) 0.004(4)
C16 0.034(3) 0.034(3) 0.034(3) -0.0001(10) 0.0013(10) 0.0001(10)
Si10 0.0099(11) 0.0226(12) 0.0046(9) 0.0000(11) -0.0046(8) 0.0043(12)
C20 0.019(2) 0.019(2) 0.019(2) -0.0002(10) 0.0004(10) 0.0004(10)
C21 0.019(2) 0.019(2) 0.019(2) 0.0002(10) 0.0006(10) -0.0004(10)
C22 0.014(4) 0.031(6) 0.012(4) -0.005(4) 0.011(3) -0.001(4)
O11 0.009(5) 0.044(6) 0.082(7) 0.014(5) 0.010(5) -0.007(5)
Si33 0.034(2) 0.030(2) 0.109(4) 0.023(2) 0.040(2) 0.0047(18)
C30 0.017(8) 0.092(15) 0.15(2) -0.013(14) 0.032(10) 0.005(8)
C31 0.044(10) 0.083(15) 0.109(16) 0.052(13) 0.025(10) 0.029(11)
C32 0.046(9) 0.039(10) 0.072(13) 0.035(10) 0.010(8) -0.007(8)
Si44 0.045(3) 0.032(3) 0.153(6) 0.018(3) 0.045(3) 0.009(2)
C33 0.031(8) 0.009(6) 0.136(17) 0.021(8) 0.024(9) 0.002(5)
C34 0.081(8) 0.081(8) 0.082(8) 0.0000(10) 0.0044(11) 0.0000(10)
C35 0.076(16) 0.014(8) 0.15(2) 0.010(10) 0.035(15) -0.005(9)
Si55 0.030(2) 0.030(2) 0.121(4) 0.010(3) 0.023(2) 0.0084(18)
C36 0.059(10) 0.059(10) 0.060(10) 0.0000(10) 0.0034(11) 0.0001(10)
C37 0.027(7) 0.038(8) 0.124(16) 0.008(9) 0.027(8) -0.003(6)
Si66 0.029(2) 0.0152(16) 0.097(3) 0.0021(19) 0.017(2) -0.0025(15)
C38 0.042(9) 0.033(8) 0.140(19) 0.007(10) 0.004(10) -0.006(7)
C45 0.046(12) 0.076(16) 0.12(2) 0.028(13) 0.018(10) 0.040(11)
Si88 0.023(2) 0.028(2) 0.106(4) 0.014(2) 0.014(2) 0.0041(17)
C42 0.030(8) 0.045(9) 0.084(13) 0.024(9) 0.010(8) -0.002(7)
C43 0.039(9) 0.029(8) 0.141(18) 0.023(10) -0.008(10) -0.011(7)
C44 0.040(6) 0.040(6) 0.040(6) -0.0001(10) 0.0021(11) -0.0004(10)
Si11 0.029(2) 0.0248(19) 0.081(3) 0.009(2) 0.0194(19) 0.0084(17)
C39 0.083(15) 0.020(8) 0.101(15) -0.003(8) 0.030(12) 0.015(8)
C40 0.067(5) 0.067(5) 0.068(5) -0.0001(10) 0.0037(11) 0.0003(10)
C41 0.028(3) 0.028(3) 0.028(3) -0.0001(10) 0.0014(10) 0.0005(10)
Si1 0.0240(8) 0.0455(10) 0.0347(9) 0.0082(8) 0.0079(7) 0.0126(8)
Si2 0.0270(9) 0.0649(14) 0.0385(10) 0.0097(10) 0.0149(7) 0.0108(10)
Si7 0.0219(7) 0.0372(9) 0.0304(8) 0.0076(8) 0.0044(6) 0.0134(8)
Si9 0.0240(8) 0.0539(11) 0.0327(8) 0.0079(10) 0.0089(6) 0.0104(10)
C1 0.049(4) 0.113(8) 0.048(4) 0.035(5) 0.021(4) 0.022(5)
C2 0.054(5) 0.115(8) 0.031(4) 0.009(5) 0.010(3) -0.017(5)
C3 0.035(4) 0.040(4) 0.057(4) 0.007(3) 0.019(3) 0.014(3)
C17 0.026(3) 0.062(5) 0.049(4) 0.002(4) 0.018(3) 0.001(3)
C18 0.036(4) 0.055(4) 0.043(4) 0.022(3) 0.015(3) 0.021(3)
C19 0.038(4) 0.094(6) 0.031(4) -0.002(4) 0.006(3) 0.005(4)
 
_geom_special_details
;
 All esds (except the esd in the dihedral angle between two l.s. planes)
 are estimated using the full covariance matrix.  The cell esds are taken
 into account individually in the estimation of esds in distances, angles
 and torsion angles; correlations between esds in cell parameters are only
 used when they are defined by crystal symmetry.  An approximate (isotropic)
 treatment of cell esds is used for estimating esds involving l.s. planes.
;
 
loop_
 _geom_bond_atom_site_label_1
 _geom_bond_atom_site_label_2
 _geom_bond_distance
 _geom_bond_site_symmetry_2
 _geom_bond_publ_flag
O1 Si5 1.628(6) . ?
O1 Si6 1.645(7) . ?
Si3 C5 1.859(12) . ?
Si3 C4 1.906(10) . ?
Si3 C6 1.913(9) . ?
Si3 Si1 2.335(3) . ?
Si4 C7 1.8361(11) . ?
Si4 C9 1.886(10) . ?
Si4 C8 1.894(12) . ?
Si4 Si1 2.384(3) . ?
Si5 C11 1.836(9) . ?
Si5 C10 1.860(16) . ?
Si5 Si1 2.3542(11) . ?
Si6 C12 1.8363(11) . ?
Si6 C13 1.893(9) . ?
Si6 Si7 2.378(3) . ?
Si8 C14 1.886(9) . ?
Si8 C16 1.899(11) . ?
Si8 C15 1.971(14) . ?
Si8 Si7 2.263(3) . ?
Si10 C22 1.872(8) . ?
Si10 C21 1.890(10) . ?
Si10 C20 1.906(10) . ?
Si10 Si7 2.402(3) . ?
O11 Si55 1.599(11) . ?
O11 Si66 1.672(12) . ?
Si33 C30 1.82(2) . ?
Si33 C32 1.8361(11) . ?
Si33 C31 1.87(2) . ?
Si33 Si1 2.479(5) . ?
Si44 C35 1.8360(11) . ?
Si44 C33 1.8362(11) . ?
Si44 C34 1.8362(11) . ?
Si44 Si1 2.116(6) . ?
Si55 C36 1.8360(11) . ?
Si55 C37 1.877(16) . ?
Si55 Si1 2.506(5) . ?
Si66 C45 1.8363(11) . ?
Si66 C38 1.933(18) . ?
Si66 Si7 2.052(4) . ?
Si88 C44 1.8359(11) . ?
Si88 C43 1.845(17) . ?
Si88 C42 1.846(18) . ?
Si88 Si7 2.506(5) . ?
Si11 C40 1.81(2) . ?
Si11 C39 1.821(18) . ?
Si11 C41 1.850(15) . ?
Si11 Si7 2.422(4) . ?
Si1 Si2 2.358(2) . ?
Si2 C2 1.864(9) . ?
Si2 C3 1.864(7) . ?
Si2 C1 1.896(9) . ?
Si7 Si9 2.339(2) . ?
Si9 C18 1.867(7) . ?
Si9 C17 1.886(7) . ?
Si9 C19 1.887(8) . ?
 
loop_
 _geom_angle_atom_site_label_1
 _geom_angle_atom_site_label_2
 _geom_angle_atom_site_label_3
 _geom_angle
 _geom_angle_site_symmetry_1
 _geom_angle_site_symmetry_3
 _geom_angle_publ_flag
Si5 O1 Si6 149.5(5) . . ?
C5 Si3 C4 108.8(5) . . ?
C5 Si3 C6 106.5(6) . . ?
C4 Si3 C6 108.6(5) . . ?
C5 Si3 Si1 110.5(5) . . ?
C4 Si3 Si1 111.9(3) . . ?
C6 Si3 Si1 110.3(3) . . ?
C7 Si4 C9 109.3(6) . . ?
C7 Si4 C8 106.5(7) . . ?
C9 Si4 C8 109.8(6) . . ?
C7 Si4 Si1 113.6(5) . . ?
C9 Si4 Si1 109.9(4) . . ?
C8 Si4 Si1 107.8(5) . . ?
O1 Si5 C11 110.5(4) . . ?
O1 Si5 C10 109.8(6) . . ?
C11 Si5 C10 111.8(6) . . ?
O1 Si5 Si1 110.3(3) . . ?
C11 Si5 Si1 107.7(3) . . ?
C10 Si5 Si1 106.8(5) . . ?
O1 Si6 C12 108.8(5) . . ?
O1 Si6 C13 109.9(4) . . ?
C12 Si6 C13 107.6(5) . . ?
O1 Si6 Si7 111.7(3) . . ?
C12 Si6 Si7 111.0(4) . . ?
C13 Si6 Si7 107.8(3) . . ?
C14 Si8 C16 107.4(5) . . ?
C14 Si8 C15 110.9(7) . . ?
C16 Si8 C15 109.6(6) . . ?
C14 Si8 Si7 109.8(4) . . ?
C16 Si8 Si7 111.1(4) . . ?
C15 Si8 Si7 108.1(5) . . ?
C22 Si10 C21 107.4(4) . . ?
C22 Si10 C20 110.7(5) . . ?
C21 Si10 C20 108.7(5) . . ?
C22 Si10 Si7 109.7(3) . . ?
C21 Si10 Si7 111.3(3) . . ?
C20 Si10 Si7 109.1(4) . . ?
Si55 O11 Si66 151.0(8) . . ?
C30 Si33 C32 107.1(10) . . ?
C30 Si33 C31 109.7(10) . . ?
C32 Si33 C31 106.7(9) . . ?
C30 Si33 Si1 115.4(5) . . ?
C32 Si33 Si1 109.2(6) . . ?
C31 Si33 Si1 108.3(7) . . ?
C35 Si44 C33 111.8(9) . . ?
C35 Si44 C34 109.3(12) . . ?
C33 Si44 C34 105.7(10) . . ?
C35 Si44 Si1 114.3(7) . . ?
C33 Si44 Si1 109.5(6) . . ?
C34 Si44 Si1 105.8(9) . . ?
O11 Si55 C36 109.8(11) . . ?
O11 Si55 C37 109.2(8) . . ?
C36 Si55 C37 109.0(12) . . ?
O11 Si55 Si1 113.0(5) . . ?
C36 Si55 Si1 110.6(10) . . ?
C37 Si55 Si1 105.1(6) . . ?
O11 Si66 C45 105.8(10) . . ?
O11 Si66 C38 109.2(7) . . ?
C45 Si66 C38 104.0(11) . . ?
O11 Si66 Si7 116.6(4) . . ?
C45 Si66 Si7 112.3(9) . . ?
C38 Si66 Si7 108.2(6) . . ?
C44 Si88 C43 111.6(10) . . ?
C44 Si88 C42 105.1(9) . . ?
C43 Si88 C42 106.0(9) . . ?
C44 Si88 Si7 116.1(8) . . ?
C43 Si88 Si7 107.7(6) . . ?
C42 Si88 Si7 109.9(5) . . ?
C40 Si11 C39 104.7(9) . . ?
C40 Si11 C41 110.4(8) . . ?
C39 Si11 C41 108.9(8) . . ?
C40 Si11 Si7 117.0(7) . . ?
C39 Si11 Si7 108.2(5) . . ?
C41 Si11 Si7 107.5(5) . . ?
Si44 Si1 Si3 69.05(16) . . ?
Si44 Si1 Si5 134.7(2) . . ?
Si3 Si1 Si5 111.72(11) . . ?
Si44 Si1 Si2 114.93(18) . . ?
Si3 Si1 Si2 109.29(10) . . ?
Si5 Si1 Si2 107.40(11) . . ?
Si44 Si1 Si4 41.29(15) . . ?
Si3 Si1 Si4 109.49(12) . . ?
Si5 Si1 Si4 110.41(11) . . ?
Si2 Si1 Si4 108.44(10) . . ?
Si44 Si1 Si33 113.60(19) . . ?
Si3 Si1 Si33 48.53(13) . . ?
Si5 Si1 Si33 67.10(12) . . ?
Si2 Si1 Si33 105.80(15) . . ?
Si4 Si1 Si33 144.44(17) . . ?
Si44 Si1 Si55 113.4(2) . . ?
Si3 Si1 Si55 137.11(15) . . ?
Si5 Si1 Si55 34.40(12) . . ?
Si2 Si1 Si55 107.45(16) . . ?
Si4 Si1 Si55 78.36(15) . . ?
Si33 Si1 Si55 100.35(15) . . ?
C2 Si2 C3 108.2(4) . . ?
C2 Si2 C1 107.6(4) . . ?
C3 Si2 C1 108.7(3) . . ?
C2 Si2 Si1 112.8(2) . . ?
C3 Si2 Si1 111.9(2) . . ?
C1 Si2 Si1 107.5(3) . . ?
Si66 Si7 Si8 134.39(18) . . ?
Si66 Si7 Si9 111.62(17) . . ?
Si8 Si7 Si9 110.25(11) . . ?
Si66 Si7 Si6 36.33(13) . . ?
Si8 Si7 Si6 112.04(10) . . ?
Si9 Si7 Si6 108.29(10) . . ?
Si66 Si7 Si10 72.12(14) . . ?
Si8 Si7 Si10 110.77(12) . . ?
Si9 Si7 Si10 107.98(9) . . ?
Si6 Si7 Si10 107.36(11) . . ?
Si66 Si7 Si11 115.74(16) . . ?
Si8 Si7 Si11 64.86(14) . . ?
Si9 Si7 Si11 109.02(14) . . ?
Si6 Si7 Si11 140.78(14) . . ?
Si10 Si7 Si11 48.89(13) . . ?
Si66 Si7 Si88 111.05(18) . . ?
Si8 Si7 Si88 39.05(12) . . ?
Si9 Si7 Si88 105.44(14) . . ?
Si6 Si7 Si88 77.91(12) . . ?
Si10 Si7 Si88 142.14(15) . . ?
Si11 Si7 Si88 103.19(17) . . ?
C18 Si9 C17 108.0(3) . . ?
C18 Si9 C19 109.3(4) . . ?
C17 Si9 C19 108.0(4) . . ?
C18 Si9 Si7 110.3(2) . . ?
C17 Si9 Si7 111.3(2) . . ?
C19 Si9 Si7 110.0(2) . . ?
 
loop_
 _geom_torsion_atom_site_label_1
 _geom_torsion_atom_site_label_2
 _geom_torsion_atom_site_label_3
 _geom_torsion_atom_site_label_4
 _geom_torsion
 _geom_torsion_site_symmetry_1
 _geom_torsion_site_symmetry_2
 _geom_torsion_site_symmetry_3
 _geom_torsion_site_symmetry_4
 _geom_torsion_publ_flag
Si6 O1 Si5 C11 2.2(11) . . . . ?
Si6 O1 Si5 C10 -121.5(10) . . . . ?
Si6 O1 Si5 Si1 121.1(9) . . . . ?
Si5 O1 Si6 C12 -122.9(10) . . . . ?
Si5 O1 Si6 C13 -5.4(11) . . . . ?
Si5 O1 Si6 Si7 114.3(9) . . . . ?
Si66 O11 Si55 C36 119.1(19) . . . . ?
Si66 O11 Si55 C37 -0.4(19) . . . . ?
Si66 O11 Si55 Si1 -116.9(16) . . . . ?
Si55 O11 Si66 C45 119.0(19) . . . . ?
Si55 O11 Si66 C38 8(2) . . . . ?
Si55 O11 Si66 Si7 -115.3(16) . . . . ?
C35 Si44 Si1 Si3 96.1(8) . . . . ?
C33 Si44 Si1 Si3 -30.2(6) . . . . ?
C34 Si44 Si1 Si3 -143.7(9) . . . . ?
C35 Si44 Si1 Si5 -4.2(9) . . . . ?
C33 Si44 Si1 Si5 -130.4(6) . . . . ?
C34 Si44 Si1 Si5 116.0(9) . . . . ?
C35 Si44 Si1 Si2 -161.7(8) . . . . ?
C33 Si44 Si1 Si2 72.1(6) . . . . ?
C34 Si44 Si1 Si2 -41.4(9) . . . . ?
C35 Si44 Si1 Si4 -71.7(8) . . . . ?
C33 Si44 Si1 Si4 162.1(7) . . . . ?
C34 Si44 Si1 Si4 48.6(9) . . . . ?
C35 Si44 Si1 Si33 76.3(8) . . . . ?
C33 Si44 Si1 Si33 -50.0(6) . . . . ?
C34 Si44 Si1 Si33 -163.5(9) . . . . ?
C35 Si44 Si1 Si55 -37.5(8) . . . . ?
C33 Si44 Si1 Si55 -163.7(6) . . . . ?
C34 Si44 Si1 Si55 82.8(9) . . . . ?
C5 Si3 Si1 Si44 157.1(5) . . . . ?
C4 Si3 Si1 Si44 35.7(4) . . . . ?
C6 Si3 Si1 Si44 -85.4(4) . . . . ?
C5 Si3 Si1 Si5 -71.7(5) . . . . ?
C4 Si3 Si1 Si5 166.8(4) . . . . ?
C6 Si3 Si1 Si5 45.8(4) . . . . ?
C5 Si3 Si1 Si2 47.0(5) . . . . ?
C4 Si3 Si1 Si2 -74.5(4) . . . . ?
C6 Si3 Si1 Si2 164.5(4) . . . . ?
C5 Si3 Si1 Si4 165.7(5) . . . . ?
C4 Si3 Si1 Si4 44.2(4) . . . . ?
C6 Si3 Si1 Si4 -76.9(4) . . . . ?
C5 Si3 Si1 Si33 -47.3(5) . . . . ?
C4 Si3 Si1 Si33 -168.8(4) . . . . ?
C6 Si3 Si1 Si33 70.1(4) . . . . ?
C5 Si3 Si1 Si55 -100.5(6) . . . . ?
C4 Si3 Si1 Si55 138.0(4) . . . . ?
C6 Si3 Si1 Si55 16.9(5) . . . . ?
O1 Si5 Si1 Si44 3.3(4) . . . . ?
C11 Si5 Si1 Si44 123.9(3) . . . . ?
C10 Si5 Si1 Si44 -116.0(5) . . . . ?
O1 Si5 Si1 Si3 -78.2(3) . . . . ?
C11 Si5 Si1 Si3 42.4(3) . . . . ?
C10 Si5 Si1 Si3 162.5(5) . . . . ?
O1 Si5 Si1 Si2 161.9(3) . . . . ?
C11 Si5 Si1 Si2 -77.5(3) . . . . ?
C10 Si5 Si1 Si2 42.7(5) . . . . ?
O1 Si5 Si1 Si4 43.9(3) . . . . ?
C11 Si5 Si1 Si4 164.5(3) . . . . ?
C10 Si5 Si1 Si4 -75.4(5) . . . . ?
O1 Si5 Si1 Si33 -97.8(3) . . . . ?
C11 Si5 Si1 Si33 22.7(3) . . . . ?
C10 Si5 Si1 Si33 142.9(5) . . . . ?
O1 Si5 Si1 Si55 66.3(4) . . . . ?
C11 Si5 Si1 Si55 -173.1(4) . . . . ?
C10 Si5 Si1 Si55 -53.0(6) . . . . ?
C7 Si4 Si1 Si44 -56.9(6) . . . . ?
C9 Si4 Si1 Si44 -179.6(5) . . . . ?
C8 Si4 Si1 Si44 60.8(6) . . . . ?
C7 Si4 Si1 Si3 -69.0(5) . . . . ?
C9 Si4 Si1 Si3 168.3(4) . . . . ?
C8 Si4 Si1 Si3 48.7(5) . . . . ?
C7 Si4 Si1 Si5 167.6(5) . . . . ?
C9 Si4 Si1 Si5 44.9(4) . . . . ?
C8 Si4 Si1 Si5 -74.8(5) . . . . ?
C7 Si4 Si1 Si2 50.2(5) . . . . ?
C9 Si4 Si1 Si2 -72.5(4) . . . . ?
C8 Si4 Si1 Si2 167.8(5) . . . . ?
C7 Si4 Si1 Si33 -113.6(5) . . . . ?
C9 Si4 Si1 Si33 123.7(4) . . . . ?
C8 Si4 Si1 Si33 4.1(6) . . . . ?
C7 Si4 Si1 Si55 154.9(5) . . . . ?
C9 Si4 Si1 Si55 32.2(4) . . . . ?
C8 Si4 Si1 Si55 -87.4(5) . . . . ?
C30 Si33 Si1 Si44 -159.3(9) . . . . ?
C32 Si33 Si1 Si44 79.9(9) . . . . ?
C31 Si33 Si1 Si44 -35.9(7) . . . . ?
C30 Si33 Si1 Si3 175.7(9) . . . . ?
C32 Si33 Si1 Si3 55.0(8) . . . . ?
C31 Si33 Si1 Si3 -60.9(7) . . . . ?
C30 Si33 Si1 Si5 -28.9(9) . . . . ?
C32 Si33 Si1 Si5 -149.6(8) . . . . ?
C31 Si33 Si1 Si5 94.5(7) . . . . ?
C30 Si33 Si1 Si2 73.7(9) . . . . ?
C32 Si33 Si1 Si2 -47.0(8) . . . . ?
C31 Si33 Si1 Si2 -162.9(7) . . . . ?
C30 Si33 Si1 Si4 -122.4(9) . . . . ?
C32 Si33 Si1 Si4 116.9(8) . . . . ?
C31 Si33 Si1 Si4 1.1(7) . . . . ?
C30 Si33 Si1 Si55 -37.9(9) . . . . ?
C32 Si33 Si1 Si55 -158.7(8) . . . . ?
C31 Si33 Si1 Si55 85.5(7) . . . . ?
O11 Si55 Si1 Si44 72.7(5) . . . . ?
C36 Si55 Si1 Si44 -163.7(11) . . . . ?
C37 Si55 Si1 Si44 -46.2(7) . . . . ?
O11 Si55 Si1 Si3 -11.2(6) . . . . ?
C36 Si55 Si1 Si3 112.4(11) . . . . ?
C37 Si55 Si1 Si3 -130.2(6) . . . . ?
O11 Si55 Si1 Si5 -63.6(5) . . . . ?
C36 Si55 Si1 Si5 60.0(11) . . . . ?
C37 Si55 Si1 Si5 177.4(7) . . . . ?
O11 Si55 Si1 Si2 -159.1(5) . . . . ?
C36 Si55 Si1 Si2 -35.5(11) . . . . ?
C37 Si55 Si1 Si2 81.9(7) . . . . ?
O11 Si55 Si1 Si4 95.0(5) . . . . ?
C36 Si55 Si1 Si4 -141.4(11) . . . . ?
C37 Si55 Si1 Si4 -24.0(6) . . . . ?
O11 Si55 Si1 Si33 -48.8(5) . . . . ?
C36 Si55 Si1 Si33 74.8(11) . . . . ?
C37 Si55 Si1 Si33 -167.7(7) . . . . ?
Si44 Si1 Si2 C2 -158.3(4) . . . . ?
Si3 Si1 Si2 C2 -83.1(4) . . . . ?
Si5 Si1 Si2 C2 38.3(4) . . . . ?
Si4 Si1 Si2 C2 157.6(4) . . . . ?
Si33 Si1 Si2 C2 -32.1(4) . . . . ?
Si55 Si1 Si2 C2 74.4(4) . . . . ?
Si44 Si1 Si2 C3 79.4(3) . . . . ?
Si3 Si1 Si2 C3 154.7(3) . . . . ?
Si5 Si1 Si2 C3 -84.0(3) . . . . ?
Si4 Si1 Si2 C3 35.4(3) . . . . ?
Si33 Si1 Si2 C3 -154.4(3) . . . . ?
Si55 Si1 Si2 C3 -47.9(3) . . . . ?
Si44 Si1 Si2 C1 -39.9(3) . . . . ?
Si3 Si1 Si2 C1 35.4(3) . . . . ?
Si5 Si1 Si2 C1 156.7(3) . . . . ?
Si4 Si1 Si2 C1 -83.9(3) . . . . ?
Si33 Si1 Si2 C1 86.3(3) . . . . ?
Si55 Si1 Si2 C1 -167.2(3) . . . . ?
O11 Si66 Si7 Si8 -5.0(6) . . . . ?
C45 Si66 Si7 Si8 117.3(10) . . . . ?
C38 Si66 Si7 Si8 -128.5(7) . . . . ?
O11 Si66 Si7 Si9 -160.3(5) . . . . ?
C45 Si66 Si7 Si9 -38.0(10) . . . . ?
C38 Si66 Si7 Si9 76.1(7) . . . . ?
O11 Si66 Si7 Si6 -68.6(5) . . . . ?
C45 Si66 Si7 Si6 53.7(10) . . . . ?
C38 Si66 Si7 Si6 167.9(8) . . . . ?
O11 Si66 Si7 Si10 96.9(5) . . . . ?
C45 Si66 Si7 Si10 -140.8(10) . . . . ?
C38 Si66 Si7 Si10 -26.6(7) . . . . ?
O11 Si66 Si7 Si11 74.2(5) . . . . ?
C45 Si66 Si7 Si11 -163.5(10) . . . . ?
C38 Si66 Si7 Si11 -49.3(7) . . . . ?
O11 Si66 Si7 Si88 -43.0(5) . . . . ?
C45 Si66 Si7 Si88 79.3(10) . . . . ?
C38 Si66 Si7 Si88 -166.5(7) . . . . ?
C14 Si8 Si7 Si66 8.4(4) . . . . ?
C16 Si8 Si7 Si66 127.0(4) . . . . ?
C15 Si8 Si7 Si66 -112.7(5) . . . . ?
C14 Si8 Si7 Si9 164.0(4) . . . . ?
C16 Si8 Si7 Si9 -77.3(4) . . . . ?
C15 Si8 Si7 Si9 43.0(5) . . . . ?
C14 Si8 Si7 Si6 43.4(4) . . . . ?
C16 Si8 Si7 Si6 162.0(4) . . . . ?
C15 Si8 Si7 Si6 -77.7(5) . . . . ?
C14 Si8 Si7 Si10 -76.5(4) . . . . ?
C16 Si8 Si7 Si10 42.1(4) . . . . ?
C15 Si8 Si7 Si10 162.4(5) . . . . ?
C14 Si8 Si7 Si11 -93.8(4) . . . . ?
C16 Si8 Si7 Si11 24.8(4) . . . . ?
C15 Si8 Si7 Si11 145.1(5) . . . . ?
C14 Si8 Si7 Si88 74.3(4) . . . . ?
C16 Si8 Si7 Si88 -167.1(5) . . . . ?
C15 Si8 Si7 Si88 -46.8(6) . . . . ?
O1 Si6 Si7 Si66 60.5(4) . . . . ?
C12 Si6 Si7 Si66 -61.1(5) . . . . ?
C13 Si6 Si7 Si66 -178.6(4) . . . . ?
O1 Si6 Si7 Si8 -75.8(3) . . . . ?
C12 Si6 Si7 Si8 162.6(4) . . . . ?
C13 Si6 Si7 Si8 45.0(3) . . . . ?
O1 Si6 Si7 Si9 162.3(3) . . . . ?
C12 Si6 Si7 Si9 40.8(4) . . . . ?
C13 Si6 Si7 Si9 -76.8(3) . . . . ?
O1 Si6 Si7 Si10 46.0(3) . . . . ?
C12 Si6 Si7 Si10 -75.6(4) . . . . ?
C13 Si6 Si7 Si10 166.9(3) . . . . ?
O1 Si6 Si7 Si11 0.9(4) . . . . ?
C12 Si6 Si7 Si11 -120.6(5) . . . . ?
C13 Si6 Si7 Si11 121.8(4) . . . . ?
O1 Si6 Si7 Si88 -95.2(3) . . . . ?
C12 Si6 Si7 Si88 143.3(4) . . . . ?
C13 Si6 Si7 Si88 25.7(3) . . . . ?
C22 Si10 Si7 Si66 -87.4(4) . . . . ?
C21 Si10 Si7 Si66 31.3(3) . . . . ?
C20 Si10 Si7 Si66 151.2(4) . . . . ?
C22 Si10 Si7 Si8 44.2(4) . . . . ?
C21 Si10 Si7 Si8 162.9(3) . . . . ?
C20 Si10 Si7 Si8 -77.2(4) . . . . ?
C22 Si10 Si7 Si9 165.0(4) . . . . ?
C21 Si10 Si7 Si9 -76.3(3) . . . . ?
C20 Si10 Si7 Si9 43.6(4) . . . . ?
C22 Si10 Si7 Si6 -78.4(4) . . . . ?
C21 Si10 Si7 Si6 40.3(3) . . . . ?
C20 Si10 Si7 Si6 160.2(4) . . . . ?
C22 Si10 Si7 Si11 65.2(4) . . . . ?
C21 Si10 Si7 Si11 -176.2(4) . . . . ?
C20 Si10 Si7 Si11 -56.2(4) . . . . ?
C22 Si10 Si7 Si88 14.2(4) . . . . ?
C21 Si10 Si7 Si88 132.8(4) . . . . ?
C20 Si10 Si7 Si88 -107.2(4) . . . . ?
C40 Si11 Si7 Si66 -159.5(8) . . . . ?
C39 Si11 Si7 Si66 -41.7(7) . . . . ?
C41 Si11 Si7 Si66 75.7(5) . . . . ?
C40 Si11 Si7 Si8 -30.4(8) . . . . ?
C39 Si11 Si7 Si8 87.4(7) . . . . ?
C41 Si11 Si7 Si8 -155.2(5) . . . . ?
C40 Si11 Si7 Si9 73.7(8) . . . . ?
C39 Si11 Si7 Si9 -168.5(7) . . . . ?
C41 Si11 Si7 Si9 -51.1(5) . . . . ?
C40 Si11 Si7 Si6 -125.0(8) . . . . ?
C39 Si11 Si7 Si6 -7.2(8) . . . . ?
C41 Si11 Si7 Si6 110.2(5) . . . . ?
C40 Si11 Si7 Si10 171.3(8) . . . . ?
C39 Si11 Si7 Si10 -70.9(7) . . . . ?
C41 Si11 Si7 Si10 46.5(5) . . . . ?
C40 Si11 Si7 Si88 -38.0(8) . . . . ?
C39 Si11 Si7 Si88 79.8(7) . . . . ?
C41 Si11 Si7 Si88 -162.8(5) . . . . ?
C44 Si88 Si7 Si66 -172.8(9) . . . . ?
C43 Si88 Si7 Si66 -46.9(7) . . . . ?
C42 Si88 Si7 Si66 68.1(6) . . . . ?
C44 Si88 Si7 Si8 51.5(8) . . . . ?
C43 Si88 Si7 Si8 177.4(8) . . . . ?
C42 Si88 Si7 Si8 -67.6(6) . . . . ?
C44 Si88 Si7 Si9 -51.8(9) . . . . ?
C43 Si88 Si7 Si9 74.1(7) . . . . ?
C42 Si88 Si7 Si9 -170.9(6) . . . . ?
C44 Si88 Si7 Si6 -157.7(9) . . . . ?
C43 Si88 Si7 Si6 -31.7(7) . . . . ?
C42 Si88 Si7 Si6 83.2(6) . . . . ?
C44 Si88 Si7 Si10 99.5(9) . . . . ?
C43 Si88 Si7 Si10 -134.6(7) . . . . ?
C42 Si88 Si7 Si10 -19.6(7) . . . . ?
C44 Si88 Si7 Si11 62.6(9) . . . . ?
C43 Si88 Si7 Si11 -171.5(7) . . . . ?
C42 Si88 Si7 Si11 -56.5(6) . . . . ?
Si66 Si7 Si9 C18 -157.0(3) . . . . ?
Si8 Si7 Si9 C18 41.5(3) . . . . ?
Si6 Si7 Si9 C18 164.4(3) . . . . ?
Si10 Si7 Si9 C18 -79.6(3) . . . . ?
Si11 Si7 Si9 C18 -27.9(3) . . . . ?
Si88 Si7 Si9 C18 82.3(3) . . . . ?
Si66 Si7 Si9 C17 83.2(3) . . . . ?
Si8 Si7 Si9 C17 -78.3(3) . . . . ?
Si6 Si7 Si9 C17 44.6(3) . . . . ?
Si10 Si7 Si9 C17 160.6(3) . . . . ?
Si11 Si7 Si9 C17 -147.7(3) . . . . ?
Si88 Si7 Si9 C17 -37.5(3) . . . . ?
Si66 Si7 Si9 C19 -36.4(3) . . . . ?
Si8 Si7 Si9 C19 162.1(3) . . . . ?
Si6 Si7 Si9 C19 -75.0(3) . . . . ?
Si10 Si7 Si9 C19 41.0(3) . . . . ?
Si11 Si7 Si9 C19 92.7(3) . . . . ?
Si88 Si7 Si9 C19 -157.1(3) . . . . ?
 
_diffrn_measured_fraction_theta_max    0.996
_diffrn_reflns_theta_full              26.34
_diffrn_measured_fraction_theta_full   0.996
_refine_diff_density_max    0.738
_refine_diff_density_min   -0.607
_refine_diff_density_rms    0.075

#===END
data_9_1193j
 
_audit_creation_method            SHELXL-97
_chemical_name_systematic
;
 ?
;
_chemical_name_common             ?
_chemical_melting_point           ?
_chemical_formula_moiety          ?
_chemical_formula_sum
 'C28 H72 O4 Si8 Yb'
_chemical_formula_weight          870.62
 
loop_
 _atom_type_symbol
 _atom_type_description
 _atom_type_scat_dispersion_real
 _atom_type_scat_dispersion_imag
 _atom_type_scat_source
 'C'  'C'   0.0033   0.0016
 'International Tables Vol C Tables 4.2.6.8 and 6.1.1.4'
 'H'  'H'   0.0000   0.0000
 'International Tables Vol C Tables 4.2.6.8 and 6.1.1.4'
 'O'  'O'   0.0106   0.0060
 'International Tables Vol C Tables 4.2.6.8 and 6.1.1.4'
 'Si'  'Si'   0.0817   0.0704
 'International Tables Vol C Tables 4.2.6.8 and 6.1.1.4'
 'Yb'  'Yb'  -0.3850   5.5486
 'International Tables Vol C Tables 4.2.6.8 and 6.1.1.4'
 
_symmetry_cell_setting            monoclinic
_symmetry_space_group_name_H-M    P2(1)/c
 
loop_
 _symmetry_equiv_pos_as_xyz
 'x, y, z'
 '-x, y+1/2, -z+1/2'
 '-x, -y, -z'
 'x, -y-1/2, z-1/2'
 
_cell_length_a                    15.441(3)
_cell_length_b                    18.603(4)
_cell_length_c                    16.113(3)
_cell_angle_alpha                 90.00
_cell_angle_beta                  102.583(3)
_cell_angle_gamma                 90.00
_cell_volume                      4517.3(16)
_cell_formula_units_Z             4
_cell_measurement_temperature     100(2)
_cell_measurement_reflns_used     21842
_cell_measurement_theta_min       5.068
_cell_measurement_theta_max       52.525
 
_exptl_crystal_description        plates
_exptl_crystal_colour             orange
_exptl_crystal_size_max           0.40
_exptl_crystal_size_mid           0.20
_exptl_crystal_size_min           0.18
_exptl_crystal_density_meas       ?
_exptl_crystal_density_diffrn     1.280
_exptl_crystal_density_method     'not measured'
_exptl_crystal_F_000              1816
_exptl_absorpt_coefficient_mu     2.309
_exptl_absorpt_correction_type    multi-scan
_exptl_absorpt_correction_T_min   0.4586
_exptl_absorpt_correction_T_max   0.6813
_exptl_absorpt_process_details    SADABS
 
_exptl_special_details
;
 ?
;
 
_diffrn_ambient_temperature       100(2)
_diffrn_radiation_wavelength      0.71073
_diffrn_radiation_type            MoK\a
_diffrn_radiation_source          'fine-focus sealed tube'
_diffrn_radiation_monochromator   graphite
_diffrn_measurement_device_type   'SMART APEX'
_diffrn_measurement_method        '\w scans'
_diffrn_detector_area_resol_mean  ?
_diffrn_standards_number          ?
_diffrn_standards_interval_count  ?
_diffrn_standards_interval_time   ?
_diffrn_standards_decay_%         ?
_diffrn_reflns_number             35249
_diffrn_reflns_av_R_equivalents   0.0268
_diffrn_reflns_av_sigmaI/netI     0.0232
_diffrn_reflns_limit_h_min        -19
_diffrn_reflns_limit_h_max        19
_diffrn_reflns_limit_k_min        -23
_diffrn_reflns_limit_k_max        23
_diffrn_reflns_limit_l_min        -20
_diffrn_reflns_limit_l_max        20
_diffrn_reflns_theta_min          1.35
_diffrn_reflns_theta_max          26.37
_reflns_number_total              9216
_reflns_number_gt                 8305
_reflns_threshold_expression      >2sigma(I)
 
_computing_data_collection        'Bruker XSCANS' 
_computing_cell_refinement        'Bruker XSCANS' 
_computing_data_reduction         'Bruker SHELXTL' 
_computing_structure_solution     'SHELXS-97 (Sheldrick, 1990)' 
_computing_structure_refinement   'SHELXL-97 (Sheldrick, 1997)' 
_computing_molecular_graphics     'Bruker SHELXTL' 
_computing_publication_material   'Bruker SHELXTL'
 
_refine_special_details
;
 Refinement of F^2^ against ALL reflections.  The weighted R-factor wR and
 goodness of fit S are based on F^2^, conventional R-factors R are based
 on F, with F set to zero for negative F^2^. The threshold expression of
 F^2^ > 2sigma(F^2^) is used only for calculating R-factors(gt) etc. and is
 not relevant to the choice of reflections for refinement.  R-factors based
 on F^2^ are statistically about twice as large as those based on F, and R-
 factors based on ALL data will be even larger.
;
 
_refine_ls_structure_factor_coef  Fsqd
_refine_ls_matrix_type            full
_refine_ls_weighting_scheme       calc
_refine_ls_weighting_details
 'calc w=1/[\s^2^(Fo^2^)+(0.0432P)^2^+0.0650P] where P=(Fo^2^+2Fc^2^)/3'
_atom_sites_solution_primary      direct
_atom_sites_solution_secondary    difmap
_atom_sites_solution_hydrogens    geom
_refine_ls_hydrogen_treatment     constr
_refine_ls_extinction_method      none
_refine_ls_extinction_coef        ?
_refine_ls_number_reflns          9216
_refine_ls_number_parameters      386
_refine_ls_number_restraints      0
_refine_ls_R_factor_all           0.0287
_refine_ls_R_factor_gt            0.0252
_refine_ls_wR_factor_ref          0.0667
_refine_ls_wR_factor_gt           0.0653
_refine_ls_goodness_of_fit_ref    1.081
_refine_ls_restrained_S_all       1.081
_refine_ls_shift/su_max           0.004
_refine_ls_shift/su_mean          0.000
 
loop_
 _atom_site_label
 _atom_site_type_symbol
 _atom_site_fract_x
 _atom_site_fract_y
 _atom_site_fract_z
 _atom_site_U_iso_or_equiv
 _atom_site_adp_type
 _atom_site_occupancy
 _atom_site_symmetry_multiplicity
 _atom_site_calc_flag
 _atom_site_refinement_flags
 _atom_site_disorder_assembly
 _atom_site_disorder_group
Yb1 Yb 0.253571(6) 0.477212(5) 0.796386(6) 0.01782(5) Uani 1 1 d . . .
Si1 Si -0.07096(5) 0.49629(4) 0.72346(4) 0.02357(14) Uani 1 1 d . . .
Si2 Si 0.06006(4) 0.43457(3) 0.78278(4) 0.01957(13) Uani 1 1 d . . .
Si3 Si 0.01236(5) 0.34890(4) 0.86901(4) 0.02442(15) Uani 1 1 d . . .
Si4 Si 0.09745(4) 0.36836(3) 0.67206(4) 0.02094(14) Uani 1 1 d . . .
Si5 Si 0.29677(4) 0.36289(3) 0.64569(4) 0.02116(14) Uani 1 1 d . . .
Si6 Si 0.41572(4) 0.40103(3) 0.75314(4) 0.02019(13) Uani 1 1 d . . .
Si7 Si 0.44203(5) 0.29488(4) 0.83234(4) 0.02544(15) Uani 1 1 d . . .
Si8 Si 0.53644(5) 0.40416(4) 0.68649(5) 0.02897(16) Uani 1 1 d . . .
O1 O 0.20773(10) 0.38341(8) 0.68708(9) 0.0203(3) Uani 1 1 d . . .
O2 O 0.26011(11) 0.55899(9) 0.67992(10) 0.0245(4) Uani 1 1 d . . .
O3 O 0.25398(14) 0.59659(9) 0.86212(12) 0.0388(5) Uani 1 1 d . . .
O4 O 0.30455(11) 0.45300(10) 0.94770(10) 0.0265(4) Uani 1 1 d . . .
C1 C -0.15391(17) 0.44742(16) 0.63870(17) 0.0351(6) Uani 1 1 d . . .
H1A H -0.2106 0.4732 0.6277 0.053 Uiso 1 1 calc R . .
H1B H -0.1626 0.3986 0.6581 0.053 Uiso 1 1 calc R . .
H1C H -0.1316 0.4451 0.5863 0.053 Uiso 1 1 calc R . .
C2 C -0.1335(2) 0.52136(16) 0.80745(19) 0.0400(7) Uani 1 1 d . . .
H2A H -0.0943 0.5482 0.8529 0.060 Uiso 1 1 calc R . .
H2B H -0.1541 0.4776 0.8310 0.060 Uiso 1 1 calc R . .
H2C H -0.1847 0.5513 0.7821 0.060 Uiso 1 1 calc R . .
C3 C -0.04690(19) 0.58362(15) 0.67468(18) 0.0376(6) Uani 1 1 d . . .
H3A H -0.1028 0.6087 0.6515 0.056 Uiso 1 1 calc R . .
H3B H -0.0159 0.5741 0.6288 0.056 Uiso 1 1 calc R . .
H3C H -0.0095 0.6136 0.7182 0.056 Uiso 1 1 calc R . .
C4 C 0.09628(19) 0.27589(14) 0.90502(17) 0.0373(6) Uani 1 1 d . . .
H4A H 0.1529 0.2974 0.9334 0.056 Uiso 1 1 calc R . .
H4B H 0.1046 0.2482 0.8556 0.056 Uiso 1 1 calc R . .
H4C H 0.0751 0.2440 0.9447 0.056 Uiso 1 1 calc R . .
C5 C -0.09412(19) 0.30042(16) 0.82073(19) 0.0407(7) Uani 1 1 d . . .
H5A H -0.0874 0.2754 0.7690 0.061 Uiso 1 1 calc R . .
H5B H -0.1427 0.3353 0.8066 0.061 Uiso 1 1 calc R . .
H5C H -0.1075 0.2654 0.8616 0.061 Uiso 1 1 calc R . .
C6 C -0.0064(2) 0.39325(16) 0.96905(16) 0.0387(7) Uani 1 1 d . . .
H6A H -0.0171 0.3563 1.0090 0.058 Uiso 1 1 calc R . .
H6B H -0.0581 0.4251 0.9548 0.058 Uiso 1 1 calc R . .
H6C H 0.0461 0.4213 0.9952 0.058 Uiso 1 1 calc R . .
C7 C 0.04749(17) 0.39975(16) 0.56156(15) 0.0344(6) Uani 1 1 d . . .
H7A H 0.0510 0.4523 0.5592 0.052 Uiso 1 1 calc R . .
H7B H -0.0148 0.3847 0.5459 0.052 Uiso 1 1 calc R . .
H7C H 0.0801 0.3787 0.5218 0.052 Uiso 1 1 calc R . .
C8 C 0.0808(2) 0.26801(14) 0.66973(19) 0.0378(7) Uani 1 1 d . . .
H8A H 0.0968 0.2481 0.6188 0.057 Uiso 1 1 calc R . .
H8B H 0.0184 0.2572 0.6686 0.057 Uiso 1 1 calc R . .
H8C H 0.1184 0.2465 0.7205 0.057 Uiso 1 1 calc R . .
C9 C 0.28284(17) 0.41290(15) 0.54177(15) 0.0302(6) Uani 1 1 d . . .
H9A H 0.2381 0.3887 0.4983 0.045 Uiso 1 1 calc R . .
H9B H 0.3395 0.4138 0.5238 0.045 Uiso 1 1 calc R . .
H9C H 0.2637 0.4623 0.5492 0.045 Uiso 1 1 calc R . .
C10 C 0.28752(18) 0.26516(14) 0.61453(17) 0.0324(6) Uani 1 1 d . . .
H10A H 0.2827 0.2360 0.6639 0.049 Uiso 1 1 calc R . .
H10B H 0.3404 0.2507 0.5944 0.049 Uiso 1 1 calc R . .
H10C H 0.2347 0.2580 0.5690 0.049 Uiso 1 1 calc R . .
C11 C 0.34057(19) 0.26596(15) 0.86955(18) 0.0378(6) Uani 1 1 d . . .
H11A H 0.2924 0.2562 0.8202 0.057 Uiso 1 1 calc R . .
H11B H 0.3224 0.3043 0.9039 0.057 Uiso 1 1 calc R . .
H11C H 0.3538 0.2223 0.9040 0.057 Uiso 1 1 calc R . .
C12 C 0.48082(19) 0.21382(14) 0.78033(18) 0.0362(6) Uani 1 1 d . . .
H12A H 0.4849 0.1724 0.8185 0.054 Uiso 1 1 calc R . .
H12B H 0.5393 0.2236 0.7685 0.054 Uiso 1 1 calc R . .
H12C H 0.4385 0.2033 0.7270 0.054 Uiso 1 1 calc R . .
C13 C 0.53131(19) 0.30974(15) 0.93124(16) 0.0362(6) Uani 1 1 d . . .
H13A H 0.5136 0.3489 0.9647 0.054 Uiso 1 1 calc R . .
H13B H 0.5870 0.3224 0.9151 0.054 Uiso 1 1 calc R . .
H13C H 0.5397 0.2656 0.9653 0.054 Uiso 1 1 calc R . .
C14 C 0.5293(2) 0.33886(18) 0.59549(18) 0.0453(8) Uani 1 1 d . . .
H14A H 0.4789 0.3516 0.5495 0.068 Uiso 1 1 calc R . .
H14B H 0.5211 0.2900 0.6153 0.068 Uiso 1 1 calc R . .
H14C H 0.5842 0.3410 0.5745 0.068 Uiso 1 1 calc R . .
C15 C 0.64285(18) 0.38056(17) 0.76311(19) 0.0415(7) Uani 1 1 d . . .
H15A H 0.6930 0.3889 0.7361 0.062 Uiso 1 1 calc R . .
H15B H 0.6416 0.3298 0.7792 0.062 Uiso 1 1 calc R . .
H15C H 0.6495 0.4107 0.8140 0.062 Uiso 1 1 calc R . .
C16 C 0.5552(2) 0.49532(18) 0.6428(2) 0.0518(9) Uani 1 1 d . . .
H16A H 0.6106 0.4948 0.6225 0.078 Uiso 1 1 calc R . .
H16B H 0.5593 0.5315 0.6877 0.078 Uiso 1 1 calc R . .
H16C H 0.5056 0.5071 0.5956 0.078 Uiso 1 1 calc R . .
C17 C 0.18541(17) 0.59678(15) 0.62783(17) 0.0334(6) Uani 1 1 d . . .
H17A H 0.1474 0.6179 0.6637 0.040 Uiso 1 1 calc R . .
H17B H 0.1491 0.5637 0.5862 0.040 Uiso 1 1 calc R . .
C18 C 0.22583(19) 0.65532(15) 0.58269(19) 0.0383(7) Uani 1 1 d . . .
H18A H 0.2363 0.6997 0.6174 0.046 Uiso 1 1 calc R . .
H18B H 0.1871 0.6667 0.5267 0.046 Uiso 1 1 calc R . .
C19 C 0.31268(19) 0.62211(15) 0.57250(17) 0.0361(6) Uani 1 1 d . . .
H19A H 0.3037 0.5898 0.5225 0.043 Uiso 1 1 calc R . .
H19B H 0.3566 0.6595 0.5668 0.043 Uiso 1 1 calc R . .
C20 C 0.34141(17) 0.58052(15) 0.65469(17) 0.0322(6) Uani 1 1 d . . .
H20A H 0.3765 0.5377 0.6459 0.039 Uiso 1 1 calc R . .
H20B H 0.3782 0.6111 0.6990 0.039 Uiso 1 1 calc R . .
C21 C 0.2905(2) 0.66496(14) 0.84547(19) 0.0391(7) Uani 1 1 d . . .
H21A H 0.2737 0.6763 0.7840 0.047 Uiso 1 1 calc R . .
H21B H 0.3561 0.6638 0.8629 0.047 Uiso 1 1 calc R . .
C22 C 0.25338(18) 0.72079(13) 0.89613(18) 0.0339(6) Uani 1 1 d . . .
H22A H 0.2971 0.7339 0.9486 0.041 Uiso 1 1 calc R . .
H22B H 0.2354 0.7647 0.8620 0.041 Uiso 1 1 calc R . .
C23 C 0.1742(2) 0.68322(16) 0.9167(2) 0.0516(8) Uani 1 1 d . . .
H23A H 0.1610 0.7019 0.9702 0.062 Uiso 1 1 calc R . .
H23B H 0.1210 0.6893 0.8702 0.062 Uiso 1 1 calc R . .
C24 C 0.2017(2) 0.60683(16) 0.9258(2) 0.0491(8) Uani 1 1 d . . .
H24A H 0.2377 0.5973 0.9836 0.059 Uiso 1 1 calc R . .
H24B H 0.1494 0.5747 0.9152 0.059 Uiso 1 1 calc R . .
C25 C 0.39282(17) 0.47592(14) 0.98986(17) 0.0294(6) Uani 1 1 d . . .
H25A H 0.3953 0.5289 0.9961 0.035 Uiso 1 1 calc R . .
H25B H 0.4369 0.4608 0.9570 0.035 Uiso 1 1 calc R . .
C26 C 0.41111(18) 0.43990(18) 1.07608(16) 0.0390(7) Uani 1 1 d . . .
H26A H 0.4534 0.4682 1.1187 0.047 Uiso 1 1 calc R . .
H26B H 0.4348 0.3907 1.0733 0.047 Uiso 1 1 calc R . .
C27 C 0.31905(19) 0.43844(15) 1.09649(16) 0.0351(6) Uani 1 1 d . . .
H27A H 0.3144 0.3998 1.1375 0.042 Uiso 1 1 calc R . .
H27B H 0.3047 0.4851 1.1199 0.042 Uiso 1 1 calc R . .
C28 C 0.26001(19) 0.42408(17) 1.01172(17) 0.0407(7) Uani 1 1 d . . .
H28A H 0.2501 0.3718 1.0033 0.049 Uiso 1 1 calc R . .
H28B H 0.2018 0.4478 1.0075 0.049 Uiso 1 1 calc R . .
 
loop_
 _atom_site_aniso_label
 _atom_site_aniso_U_11
 _atom_site_aniso_U_22
 _atom_site_aniso_U_33
 _atom_site_aniso_U_23
 _atom_site_aniso_U_13
 _atom_site_aniso_U_12
Yb1 0.01942(7) 0.01797(6) 0.01650(6) -0.00173(3) 0.00485(4) -0.00133(4)
Si1 0.0214(3) 0.0303(3) 0.0191(3) 0.0013(3) 0.0046(3) 0.0034(3)
Si2 0.0198(3) 0.0232(3) 0.0157(3) 0.0005(2) 0.0039(2) -0.0010(3)
Si3 0.0259(4) 0.0279(3) 0.0188(3) 0.0030(3) 0.0033(3) -0.0054(3)
Si4 0.0201(3) 0.0247(3) 0.0170(3) -0.0028(2) 0.0018(3) -0.0022(3)
Si5 0.0222(3) 0.0246(3) 0.0163(3) -0.0033(2) 0.0033(3) 0.0031(3)
Si6 0.0194(3) 0.0231(3) 0.0177(3) -0.0019(2) 0.0033(3) 0.0026(3)
Si7 0.0263(4) 0.0241(3) 0.0242(3) 0.0008(3) 0.0017(3) 0.0043(3)
Si8 0.0243(4) 0.0332(4) 0.0320(4) -0.0017(3) 0.0118(3) 0.0031(3)
O1 0.0189(8) 0.0232(8) 0.0180(8) -0.0034(6) 0.0023(6) 0.0011(7)
O2 0.0238(9) 0.0264(9) 0.0241(8) 0.0036(7) 0.0070(7) -0.0001(7)
O3 0.0635(14) 0.0231(9) 0.0389(11) -0.0058(8) 0.0305(10) -0.0069(9)
O4 0.0217(9) 0.0367(9) 0.0205(8) -0.0017(7) 0.0036(7) -0.0053(8)
C1 0.0269(14) 0.0464(16) 0.0290(13) -0.0020(12) -0.0003(11) 0.0036(12)
C2 0.0362(16) 0.056(2) 0.0306(15) 0.0001(12) 0.0124(13) 0.0133(13)
C3 0.0365(16) 0.0366(15) 0.0385(15) 0.0113(12) 0.0053(13) 0.0076(12)
C4 0.0431(17) 0.0344(15) 0.0308(14) 0.0092(12) 0.0002(12) -0.0005(13)
C5 0.0325(15) 0.0474(17) 0.0405(16) 0.0042(13) 0.0044(13) -0.0160(13)
C6 0.0463(17) 0.0481(17) 0.0249(13) 0.0013(12) 0.0146(12) -0.0056(14)
C7 0.0305(14) 0.0521(17) 0.0192(12) -0.0037(12) 0.0020(11) 0.0057(13)
C8 0.0426(16) 0.0307(14) 0.0428(16) -0.0130(12) 0.0153(13) -0.0118(13)
C9 0.0299(14) 0.0415(15) 0.0194(12) 0.0006(11) 0.0058(10) 0.0037(12)
C10 0.0320(14) 0.0317(14) 0.0316(14) -0.0126(11) 0.0031(11) 0.0012(11)
C11 0.0378(16) 0.0369(15) 0.0401(16) 0.0080(13) 0.0114(13) 0.0018(12)
C12 0.0346(15) 0.0274(14) 0.0423(16) -0.0026(12) -0.0010(13) 0.0088(11)
C13 0.0414(16) 0.0349(15) 0.0281(13) 0.0031(12) -0.0018(12) 0.0066(13)
C14 0.0431(18) 0.060(2) 0.0363(16) -0.0110(14) 0.0170(14) 0.0120(15)
C15 0.0261(14) 0.0473(17) 0.0518(18) -0.0035(14) 0.0102(13) -0.0002(13)
C16 0.0419(19) 0.0479(18) 0.077(3) 0.0120(18) 0.0374(18) 0.0031(15)
C17 0.0276(14) 0.0355(14) 0.0366(15) 0.0102(12) 0.0062(12) 0.0050(11)
C18 0.0432(17) 0.0329(15) 0.0394(16) 0.0127(12) 0.0102(13) 0.0093(13)
C19 0.0415(16) 0.0369(15) 0.0326(14) 0.0039(12) 0.0137(13) -0.0047(13)
C20 0.0267(13) 0.0386(15) 0.0327(14) 0.0095(11) 0.0099(11) -0.0052(11)
C21 0.0536(19) 0.0257(14) 0.0415(16) -0.0066(12) 0.0178(14) -0.0103(13)
C22 0.0355(15) 0.0220(13) 0.0410(15) -0.0036(11) 0.0015(12) 0.0005(11)
C23 0.0470(19) 0.0396(17) 0.072(2) -0.0114(16) 0.0225(17) 0.0045(14)
C24 0.069(2) 0.0363(16) 0.0529(19) -0.0110(14) 0.0364(18) -0.0073(15)
C25 0.0224(13) 0.0399(16) 0.0250(13) -0.0026(10) 0.0031(11) -0.0064(10)
C26 0.0325(15) 0.061(2) 0.0219(13) 0.0019(13) 0.0029(11) -0.0017(14)
C27 0.0411(16) 0.0383(15) 0.0279(13) 0.0005(12) 0.0121(12) -0.0022(13)
C28 0.0344(16) 0.0558(19) 0.0326(15) 0.0045(13) 0.0088(12) -0.0118(14)
 
_geom_special_details
;
 All esds (except the esd in the dihedral angle between two l.s. planes)
 are estimated using the full covariance matrix.  The cell esds are taken
 into account individually in the estimation of esds in distances, angles
 and torsion angles; correlations between esds in cell parameters are only
 used when they are defined by crystal symmetry.  An approximate (isotropic)
 treatment of cell esds is used for estimating esds involving l.s. planes.
;
 
loop_
 _geom_bond_atom_site_label_1
 _geom_bond_atom_site_label_2
 _geom_bond_distance
 _geom_bond_site_symmetry_2
 _geom_bond_publ_flag
Yb1 O2 2.4350(16) . ?
Yb1 O4 2.4354(17) . ?
Yb1 O3 2.4598(18) . ?
Yb1 O1 2.4707(15) . ?
Yb1 Si2 3.0528(9) . ?
Yb1 Si6 3.0860(8) . ?
Yb1 Si5 3.4015(8) . ?
Yb1 Si4 3.4380(8) . ?
Si1 C3 1.877(3) . ?
Si1 C2 1.885(3) . ?
Si1 C1 1.889(3) . ?
Si1 Si2 2.3415(10) . ?
Si2 Si3 2.3365(9) . ?
Si2 Si4 2.3412(9) . ?
Si3 C4 1.880(3) . ?
Si3 C5 1.888(3) . ?
Si3 C6 1.889(3) . ?
Si4 O1 1.6903(17) . ?
Si4 C7 1.873(3) . ?
Si4 C8 1.884(3) . ?
Si5 O1 1.6973(16) . ?
Si5 C10 1.883(3) . ?
Si5 C9 1.886(3) . ?
Si5 Si6 2.3428(9) . ?
Si6 Si7 2.3381(10) . ?
Si6 Si8 2.3459(10) . ?
Si7 C11 1.874(3) . ?
Si7 C12 1.885(3) . ?
Si7 C13 1.887(3) . ?
Si8 C15 1.880(3) . ?
Si8 C16 1.882(3) . ?
Si8 C14 1.889(3) . ?
O2 C17 1.452(3) . ?
O2 C20 1.457(3) . ?
O3 C21 1.440(3) . ?
O3 C24 1.450(3) . ?
O4 C25 1.448(3) . ?
O4 C28 1.461(3) . ?
C17 C18 1.517(4) . ?
C18 C19 1.518(4) . ?
C19 C20 1.514(4) . ?
C21 C22 1.509(4) . ?
C22 C23 1.507(4) . ?
C23 C24 1.482(4) . ?
C25 C26 1.513(4) . ?
C26 C27 1.528(4) . ?
C27 C28 1.492(4) . ?
 
loop_
 _geom_angle_atom_site_label_1
 _geom_angle_atom_site_label_2
 _geom_angle_atom_site_label_3
 _geom_angle
 _geom_angle_site_symmetry_1
 _geom_angle_site_symmetry_3
 _geom_angle_publ_flag
O2 Yb1 O4 145.95(6) . . ?
O2 Yb1 O3 76.77(6) . . ?
O4 Yb1 O3 76.46(6) . . ?
O2 Yb1 O1 86.87(6) . . ?
O4 Yb1 O1 124.26(6) . . ?
O3 Yb1 O1 156.64(6) . . ?
O2 Yb1 Si2 108.14(4) . . ?
O4 Yb1 Si2 96.99(4) . . ?
O3 Yb1 Si2 100.15(5) . . ?
O1 Yb1 Si2 68.98(4) . . ?
O2 Yb1 Si6 86.62(4) . . ?
O4 Yb1 Si6 92.29(4) . . ?
O3 Yb1 Si6 125.86(5) . . ?
O1 Yb1 Si6 68.60(4) . . ?
Si2 Yb1 Si6 133.95(2) . . ?
O2 Yb1 Si5 78.05(4) . . ?
O4 Yb1 Si5 121.88(5) . . ?
O3 Yb1 Si5 152.79(4) . . ?
O1 Yb1 Si5 28.34(4) . . ?
Si2 Yb1 Si5 97.318(18) . . ?
Si6 Yb1 Si5 41.987(16) . . ?
O2 Yb1 Si4 93.46(4) . . ?
O4 Yb1 Si4 120.47(4) . . ?
O3 Yb1 Si4 135.92(5) . . ?
O1 Yb1 Si4 27.51(4) . . ?
Si2 Yb1 Si4 41.760(16) . . ?
Si6 Yb1 Si4 95.64(2) . . ?
Si5 Yb1 Si4 55.770(19) . . ?
C3 Si1 C2 105.41(13) . . ?
C3 Si1 C1 106.18(13) . . ?
C2 Si1 C1 105.39(14) . . ?
C3 Si1 Si2 111.29(9) . . ?
C2 Si1 Si2 111.14(10) . . ?
C1 Si1 Si2 116.65(10) . . ?
Si3 Si2 Si4 104.85(4) . . ?
Si3 Si2 Si1 102.76(4) . . ?
Si4 Si2 Si1 106.35(3) . . ?
Si3 Si2 Yb1 124.40(3) . . ?
Si4 Si2 Yb1 77.96(2) . . ?
Si1 Si2 Yb1 130.32(3) . . ?
C4 Si3 C5 105.18(13) . . ?
C4 Si3 C6 106.02(13) . . ?
C5 Si3 C6 106.17(13) . . ?
C4 Si3 Si2 113.02(9) . . ?
C5 Si3 Si2 116.09(9) . . ?
C6 Si3 Si2 109.67(10) . . ?
O1 Si4 C7 106.14(11) . . ?
O1 Si4 C8 107.23(11) . . ?
C7 Si4 C8 105.29(13) . . ?
O1 Si4 Si2 102.22(6) . . ?
C7 Si4 Si2 116.20(9) . . ?
C8 Si4 Si2 118.76(9) . . ?
O1 Si4 Yb1 42.47(5) . . ?
C7 Si4 Yb1 117.49(10) . . ?
C8 Si4 Yb1 132.13(10) . . ?
Si2 Si4 Yb1 60.28(2) . . ?
O1 Si5 C10 107.52(10) . . ?
O1 Si5 C9 107.00(10) . . ?
C10 Si5 C9 104.60(12) . . ?
O1 Si5 Si6 102.31(6) . . ?
C10 Si5 Si6 119.41(9) . . ?
C9 Si5 Si6 115.22(9) . . ?
O1 Si5 Yb1 43.71(5) . . ?
C10 Si5 Yb1 141.13(9) . . ?
C9 Si5 Yb1 108.85(9) . . ?
Si6 Si5 Yb1 61.78(2) . . ?
Si7 Si6 Si5 99.36(3) . . ?
Si7 Si6 Si8 102.12(4) . . ?
Si5 Si6 Si8 104.03(4) . . ?
Si7 Si6 Yb1 108.52(3) . . ?
Si5 Si6 Yb1 76.23(3) . . ?
Si8 Si6 Yb1 148.94(3) . . ?
C11 Si7 C12 106.33(13) . . ?
C11 Si7 C13 106.24(13) . . ?
C12 Si7 C13 104.37(12) . . ?
C11 Si7 Si6 111.05(9) . . ?
C12 Si7 Si6 117.85(10) . . ?
C13 Si7 Si6 110.21(9) . . ?
C15 Si8 C16 105.78(15) . . ?
C15 Si8 C14 104.75(14) . . ?
C16 Si8 C14 106.08(16) . . ?
C15 Si8 Si6 111.20(10) . . ?
C16 Si8 Si6 113.33(10) . . ?
C14 Si8 Si6 114.93(10) . . ?
Si4 O1 Si5 141.59(10) . . ?
Si4 O1 Yb1 110.01(7) . . ?
Si5 O1 Yb1 107.95(8) . . ?
C17 O2 C20 109.27(18) . . ?
C17 O2 Yb1 125.94(14) . . ?
C20 O2 Yb1 124.72(14) . . ?
C21 O3 C24 108.48(19) . . ?
C21 O3 Yb1 132.95(15) . . ?
C24 O3 Yb1 118.29(15) . . ?
C25 O4 C28 108.47(19) . . ?
C25 O4 Yb1 118.75(14) . . ?
C28 O4 Yb1 132.50(15) . . ?
O2 C17 C18 105.5(2) . . ?
C17 C18 C19 103.0(2) . . ?
C20 C19 C18 102.2(2) . . ?
O2 C20 C19 106.2(2) . . ?
O3 C21 C22 107.2(2) . . ?
C23 C22 C21 102.8(2) . . ?
C24 C23 C22 103.7(2) . . ?
O3 C24 C23 104.3(2) . . ?
O4 C25 C26 105.6(2) . . ?
C25 C26 C27 102.1(2) . . ?
C28 C27 C26 102.6(2) . . ?
O4 C28 C27 107.0(2) . . ?
 
loop_
 _geom_torsion_atom_site_label_1
 _geom_torsion_atom_site_label_2
 _geom_torsion_atom_site_label_3
 _geom_torsion_atom_site_label_4
 _geom_torsion
 _geom_torsion_site_symmetry_1
 _geom_torsion_site_symmetry_2
 _geom_torsion_site_symmetry_3
 _geom_torsion_site_symmetry_4
 _geom_torsion_publ_flag
C3 Si1 Si2 Si3 164.60(10) . . . . ?
C2 Si1 Si2 Si3 47.44(11) . . . . ?
C1 Si1 Si2 Si3 -73.38(11) . . . . ?
C3 Si1 Si2 Si4 -85.50(11) . . . . ?
C2 Si1 Si2 Si4 157.34(11) . . . . ?
C1 Si1 Si2 Si4 36.52(11) . . . . ?
C3 Si1 Si2 Yb1 2.43(11) . . . . ?
C2 Si1 Si2 Yb1 -114.73(11) . . . . ?
C1 Si1 Si2 Yb1 124.45(10) . . . . ?
O2 Yb1 Si2 Si3 174.14(5) . . . . ?
O4 Yb1 Si2 Si3 -29.15(6) . . . . ?
O3 Yb1 Si2 Si3 -106.58(6) . . . . ?
O1 Yb1 Si2 Si3 94.94(5) . . . . ?
Si6 Yb1 Si2 Si3 70.88(4) . . . . ?
Si5 Yb1 Si2 Si3 94.37(4) . . . . ?
Si4 Yb1 Si2 Si3 99.89(4) . . . . ?
O2 Yb1 Si2 Si4 74.25(5) . . . . ?
O4 Yb1 Si2 Si4 -129.03(5) . . . . ?
O3 Yb1 Si2 Si4 153.54(5) . . . . ?
O1 Yb1 Si2 Si4 -4.94(4) . . . . ?
Si6 Yb1 Si2 Si4 -29.01(3) . . . . ?
Si5 Yb1 Si2 Si4 -5.51(2) . . . . ?
O2 Yb1 Si2 Si1 -27.08(6) . . . . ?
O4 Yb1 Si2 Si1 129.64(5) . . . . ?
O3 Yb1 Si2 Si1 52.21(6) . . . . ?
O1 Yb1 Si2 Si1 -106.27(6) . . . . ?
Si6 Yb1 Si2 Si1 -130.34(4) . . . . ?
Si5 Yb1 Si2 Si1 -106.84(4) . . . . ?
Si4 Yb1 Si2 Si1 -101.33(4) . . . . ?
Si4 Si2 Si3 C4 54.78(10) . . . . ?
Si1 Si2 Si3 C4 165.80(10) . . . . ?
Yb1 Si2 Si3 C4 -30.63(11) . . . . ?
Si4 Si2 Si3 C5 -66.88(12) . . . . ?
Si1 Si2 Si3 C5 44.14(12) . . . . ?
Yb1 Si2 Si3 C5 -152.30(11) . . . . ?
Si4 Si2 Si3 C6 172.84(10) . . . . ?
Si1 Si2 Si3 C6 -76.15(11) . . . . ?
Yb1 Si2 Si3 C6 87.42(11) . . . . ?
Si3 Si2 Si4 O1 -115.85(6) . . . . ?
Si1 Si2 Si4 O1 135.73(6) . . . . ?
Yb1 Si2 Si4 O1 6.91(6) . . . . ?
Si3 Si2 Si4 C7 129.09(11) . . . . ?
Si1 Si2 Si4 C7 20.67(11) . . . . ?
Yb1 Si2 Si4 C7 -108.15(10) . . . . ?
Si3 Si2 Si4 C8 1.84(12) . . . . ?
Si1 Si2 Si4 C8 -106.58(12) . . . . ?
Yb1 Si2 Si4 C8 124.60(11) . . . . ?
Si3 Si2 Si4 Yb1 -122.76(3) . . . . ?
Si1 Si2 Si4 Yb1 128.82(3) . . . . ?
O2 Yb1 Si4 O1 76.42(9) . . . . ?
O4 Yb1 Si4 O1 -106.52(9) . . . . ?
O3 Yb1 Si4 O1 150.94(10) . . . . ?
Si2 Yb1 Si4 O1 -169.97(9) . . . . ?
Si6 Yb1 Si4 O1 -10.51(8) . . . . ?
Si5 Yb1 Si4 O1 3.41(8) . . . . ?
O2 Yb1 Si4 C7 -7.58(10) . . . . ?
O4 Yb1 Si4 C7 169.47(10) . . . . ?
O3 Yb1 Si4 C7 66.94(11) . . . . ?
O1 Yb1 Si4 C7 -84.00(12) . . . . ?
Si2 Yb1 Si4 C7 106.02(10) . . . . ?
Si6 Yb1 Si4 C7 -94.52(10) . . . . ?
Si5 Yb1 Si4 C7 -80.59(10) . . . . ?
O2 Yb1 Si4 C8 143.07(13) . . . . ?
O4 Yb1 Si4 C8 -39.88(13) . . . . ?
O3 Yb1 Si4 C8 -142.42(13) . . . . ?
O1 Yb1 Si4 C8 66.64(14) . . . . ?
Si2 Yb1 Si4 C8 -103.33(12) . . . . ?
Si6 Yb1 Si4 C8 56.13(12) . . . . ?
Si5 Yb1 Si4 C8 70.05(12) . . . . ?
O2 Yb1 Si4 Si2 -113.60(4) . . . . ?
O4 Yb1 Si4 Si2 63.45(5) . . . . ?
O3 Yb1 Si4 Si2 -39.09(6) . . . . ?
O1 Yb1 Si4 Si2 169.97(9) . . . . ?
Si6 Yb1 Si4 Si2 159.46(2) . . . . ?
Si5 Yb1 Si4 Si2 173.38(3) . . . . ?
O2 Yb1 Si5 O1 -105.95(9) . . . . ?
O4 Yb1 Si5 O1 104.08(9) . . . . ?
O3 Yb1 Si5 O1 -128.55(14) . . . . ?
Si2 Yb1 Si5 O1 1.12(8) . . . . ?
Si6 Yb1 Si5 O1 155.71(8) . . . . ?
Si4 Yb1 Si5 O1 -3.32(8) . . . . ?
O2 Yb1 Si5 C10 -158.81(14) . . . . ?
O4 Yb1 Si5 C10 51.22(15) . . . . ?
O3 Yb1 Si5 C10 178.60(17) . . . . ?
O1 Yb1 Si5 C10 -52.86(15) . . . . ?
Si2 Yb1 Si5 C10 -51.74(14) . . . . ?
Si6 Yb1 Si5 C10 102.85(14) . . . . ?
Si4 Yb1 Si5 C10 -56.18(14) . . . . ?
O2 Yb1 Si5 C9 -10.79(10) . . . . ?
O4 Yb1 Si5 C9 -160.76(10) . . . . ?
O3 Yb1 Si5 C9 -33.38(15) . . . . ?
O1 Yb1 Si5 C9 95.16(12) . . . . ?
Si2 Yb1 Si5 C9 96.28(9) . . . . ?
Si6 Yb1 Si5 C9 -109.13(9) . . . . ?
Si4 Yb1 Si5 C9 91.84(9) . . . . ?
O2 Yb1 Si5 Si6 98.34(4) . . . . ?
O4 Yb1 Si5 Si6 -51.62(5) . . . . ?
O3 Yb1 Si5 Si6 75.75(12) . . . . ?
O1 Yb1 Si5 Si6 -155.71(8) . . . . ?
Si2 Yb1 Si5 Si6 -154.59(2) . . . . ?
Si4 Yb1 Si5 Si6 -159.03(3) . . . . ?
O1 Si5 Si6 Si7 90.00(6) . . . . ?
C10 Si5 Si6 Si7 -28.47(11) . . . . ?
C9 Si5 Si6 Si7 -154.30(9) . . . . ?
Yb1 Si5 Si6 Si7 106.92(3) . . . . ?
O1 Si5 Si6 Si8 -164.89(6) . . . . ?
C10 Si5 Si6 Si8 76.63(10) . . . . ?
C9 Si5 Si6 Si8 -49.20(10) . . . . ?
Yb1 Si5 Si6 Si8 -147.98(3) . . . . ?
O1 Si5 Si6 Yb1 -16.92(6) . . . . ?
C10 Si5 Si6 Yb1 -135.39(10) . . . . ?
C9 Si5 Si6 Yb1 98.78(9) . . . . ?
O2 Yb1 Si6 Si7 -171.28(5) . . . . ?
O4 Yb1 Si6 Si7 42.80(5) . . . . ?
O3 Yb1 Si6 Si7 117.72(6) . . . . ?
O1 Yb1 Si6 Si7 -83.32(5) . . . . ?
Si2 Yb1 Si6 Si7 -59.19(4) . . . . ?
Si5 Yb1 Si6 Si7 -95.42(4) . . . . ?
Si4 Yb1 Si6 Si7 -78.12(3) . . . . ?
O2 Yb1 Si6 Si5 -75.85(5) . . . . ?
O4 Yb1 Si6 Si5 138.22(5) . . . . ?
O3 Yb1 Si6 Si5 -146.85(6) . . . . ?
O1 Yb1 Si6 Si5 12.11(4) . . . . ?
Si2 Yb1 Si6 Si5 36.24(3) . . . . ?
Si4 Yb1 Si6 Si5 17.30(2) . . . . ?
O2 Yb1 Si6 Si8 18.55(7) . . . . ?
O4 Yb1 Si6 Si8 -127.37(7) . . . . ?
O3 Yb1 Si6 Si8 -52.45(9) . . . . ?
O1 Yb1 Si6 Si8 106.51(7) . . . . ?
Si2 Yb1 Si6 Si8 130.64(6) . . . . ?
Si5 Yb1 Si6 Si8 94.40(7) . . . . ?
Si4 Yb1 Si6 Si8 111.70(6) . . . . ?
Si5 Si6 Si7 C11 -58.27(11) . . . . ?
Si8 Si6 Si7 C11 -164.93(10) . . . . ?
Yb1 Si6 Si7 C11 20.24(11) . . . . ?
Si5 Si6 Si7 C12 64.69(11) . . . . ?
Si8 Si6 Si7 C12 -41.96(11) . . . . ?
Yb1 Si6 Si7 C12 143.20(10) . . . . ?
Si5 Si6 Si7 C13 -175.72(10) . . . . ?
Si8 Si6 Si7 C13 77.62(10) . . . . ?
Yb1 Si6 Si7 C13 -97.21(10) . . . . ?
Si7 Si6 Si8 C15 -44.09(11) . . . . ?
Si5 Si6 Si8 C15 -147.10(11) . . . . ?
Yb1 Si6 Si8 C15 126.38(11) . . . . ?
Si7 Si6 Si8 C16 -163.09(14) . . . . ?
Si5 Si6 Si8 C16 93.90(14) . . . . ?
Yb1 Si6 Si8 C16 7.38(16) . . . . ?
Si7 Si6 Si8 C14 74.69(12) . . . . ?
Si5 Si6 Si8 C14 -28.32(12) . . . . ?
Yb1 Si6 Si8 C14 -114.84(12) . . . . ?
C7 Si4 O1 Si5 -57.57(19) . . . . ?
C8 Si4 O1 Si5 54.6(2) . . . . ?
Si2 Si4 O1 Si5 -179.77(14) . . . . ?
Yb1 Si4 O1 Si5 -170.9(2) . . . . ?
C7 Si4 O1 Yb1 113.31(11) . . . . ?
C8 Si4 O1 Yb1 -134.53(11) . . . . ?
Si2 Si4 O1 Yb1 -8.90(8) . . . . ?
C10 Si5 O1 Si4 -40.7(2) . . . . ?
C9 Si5 O1 Si4 71.25(19) . . . . ?
Si6 Si5 O1 Si4 -167.24(14) . . . . ?
Yb1 Si5 O1 Si4 171.0(2) . . . . ?
C10 Si5 O1 Yb1 148.36(10) . . . . ?
C9 Si5 O1 Yb1 -99.74(11) . . . . ?
Si6 Si5 O1 Yb1 21.78(7) . . . . ?
O2 Yb1 O1 Si4 -103.65(8) . . . . ?
O4 Yb1 O1 Si4 91.17(9) . . . . ?
O3 Yb1 O1 Si4 -58.44(17) . . . . ?
Si2 Yb1 O1 Si4 7.14(6) . . . . ?
Si6 Yb1 O1 Si4 168.76(9) . . . . ?
Si5 Yb1 O1 Si4 -174.05(14) . . . . ?
O2 Yb1 O1 Si5 70.40(8) . . . . ?
O4 Yb1 O1 Si5 -94.78(9) . . . . ?
O3 Yb1 O1 Si5 115.61(14) . . . . ?
Si2 Yb1 O1 Si5 -178.81(8) . . . . ?
Si6 Yb1 O1 Si5 -17.19(6) . . . . ?
Si4 Yb1 O1 Si5 174.05(14) . . . . ?
O4 Yb1 O2 C17 -119.74(18) . . . . ?
O3 Yb1 O2 C17 -80.75(19) . . . . ?
O1 Yb1 O2 C17 82.45(18) . . . . ?
Si2 Yb1 O2 C17 15.77(19) . . . . ?
Si6 Yb1 O2 C17 151.18(18) . . . . ?
Si5 Yb1 O2 C17 109.64(18) . . . . ?
Si4 Yb1 O2 C17 55.72(18) . . . . ?
O4 Yb1 O2 C20 56.8(2) . . . . ?
O3 Yb1 O2 C20 95.80(19) . . . . ?
O1 Yb1 O2 C20 -101.01(18) . . . . ?
Si2 Yb1 O2 C20 -167.69(17) . . . . ?
Si6 Yb1 O2 C20 -32.28(18) . . . . ?
Si5 Yb1 O2 C20 -73.81(18) . . . . ?
Si4 Yb1 O2 C20 -127.73(18) . . . . ?
O2 Yb1 O3 C21 -29.0(2) . . . . ?
O4 Yb1 O3 C21 129.8(3) . . . . ?
O1 Yb1 O3 C21 -75.7(3) . . . . ?
Si2 Yb1 O3 C21 -135.4(2) . . . . ?
Si6 Yb1 O3 C21 46.8(3) . . . . ?
Si5 Yb1 O3 C21 -6.3(3) . . . . ?
Si4 Yb1 O3 C21 -110.2(2) . . . . ?
O2 Yb1 O3 C24 144.2(2) . . . . ?
O4 Yb1 O3 C24 -57.1(2) . . . . ?
O1 Yb1 O3 C24 97.5(2) . . . . ?
Si2 Yb1 O3 C24 37.8(2) . . . . ?
Si6 Yb1 O3 C24 -140.0(2) . . . . ?
Si5 Yb1 O3 C24 166.89(17) . . . . ?
Si4 Yb1 O3 C24 63.0(2) . . . . ?
O2 Yb1 O4 C25 -32.5(2) . . . . ?
O3 Yb1 O4 C25 -71.59(17) . . . . ?
O1 Yb1 O4 C25 120.31(16) . . . . ?
Si2 Yb1 O4 C25 -170.40(16) . . . . ?
Si6 Yb1 O4 C25 54.80(16) . . . . ?
Si5 Yb1 O4 C25 86.46(16) . . . . ?
Si4 Yb1 O4 C25 152.72(15) . . . . ?
O2 Yb1 O4 C28 140.6(2) . . . . ?
O3 Yb1 O4 C28 101.6(2) . . . . ?
O1 Yb1 O4 C28 -66.5(2) . . . . ?
Si2 Yb1 O4 C28 2.8(2) . . . . ?
Si6 Yb1 O4 C28 -132.0(2) . . . . ?
Si5 Yb1 O4 C28 -100.4(2) . . . . ?
Si4 Yb1 O4 C28 -34.1(2) . . . . ?
C20 O2 C17 C18 -12.5(3) . . . . ?
Yb1 O2 C17 C18 164.47(16) . . . . ?
O2 C17 C18 C19 31.1(3) . . . . ?
C17 C18 C19 C20 -37.0(3) . . . . ?
C17 O2 C20 C19 -11.2(3) . . . . ?
Yb1 O2 C20 C19 171.73(15) . . . . ?
C18 C19 C20 O2 30.1(3) . . . . ?
C24 O3 C21 C22 -4.5(3) . . . . ?
Yb1 O3 C21 C22 169.15(18) . . . . ?
O3 C21 C22 C23 -17.9(3) . . . . ?
C21 C22 C23 C24 33.1(3) . . . . ?
C21 O3 C24 C23 25.7(3) . . . . ?
Yb1 O3 C24 C23 -149.1(2) . . . . ?
C22 C23 C24 O3 -36.5(3) . . . . ?
C28 O4 C25 C26 16.9(3) . . . . ?
Yb1 O4 C25 C26 -168.38(17) . . . . ?
O4 C25 C26 C27 -33.5(3) . . . . ?
C25 C26 C27 C28 37.0(3) . . . . ?
C25 O4 C28 C27 7.2(3) . . . . ?
Yb1 O4 C28 C27 -166.52(17) . . . . ?
C26 C27 C28 O4 -27.8(3) . . . . ?
 
_diffrn_measured_fraction_theta_max    0.996
_diffrn_reflns_theta_full              26.37
_diffrn_measured_fraction_theta_full   0.996
_refine_diff_density_max    1.674
_refine_diff_density_min   -1.092
_refine_diff_density_rms    0.094

# SQUEEZE RESULTS (APPEND TO CIF)
# Note: Data are Listed for all Voids in the P1 Unit Cell
# i.e. Centre of Gravity, Solvent Accessible Volume,
# Recovered number of Electrons in the Void and
# Details about the Squeezed Material
loop_
  _platon_squeeze_void_nr
  _platon_squeeze_void_average_x
  _platon_squeeze_void_average_y
  _platon_squeeze_void_average_z
  _platon_squeeze_void_volume
  _platon_squeeze_void_count_electrons
  _platon_squeeze_void_content
   1  0.055  0.771  0.000         7         0 ' '
   2  0.055  0.729  0.500         7         0 ' '
   3  0.265  0.375  0.297        37         0 ' '
   4  0.265  0.125  0.797        37         0 ' '
   5  0.735  0.875  0.203        37         0 ' '
   6  0.735  0.625  0.703        37         0 ' '
   7  0.944  0.229  0.000         7         0 ' '
   8  0.944  0.271  0.500         7         0 ' '
_platon_squeeze_details
;
;

#===END
data_10_1222
 
_audit_creation_method            SHELXL-97
_chemical_name_systematic
;
 ?
;
_chemical_name_common             ?
_chemical_melting_point           ?
_chemical_formula_moiety          ?
_chemical_formula_sum
 'C28 H72 O4 Si8 Sm'
_chemical_formula_weight          847.93
 
loop_
 _atom_type_symbol
 _atom_type_description
 _atom_type_scat_dispersion_real
 _atom_type_scat_dispersion_imag
 _atom_type_scat_source
 'C'  'C'   0.0033   0.0016
 'International Tables Vol C Tables 4.2.6.8 and 6.1.1.4'
 'H'  'H'   0.0000   0.0000
 'International Tables Vol C Tables 4.2.6.8 and 6.1.1.4'
 'O'  'O'   0.0106   0.0060
 'International Tables Vol C Tables 4.2.6.8 and 6.1.1.4'
 'Si'  'Si'   0.0817   0.0704
 'International Tables Vol C Tables 4.2.6.8 and 6.1.1.4'
 'Sm'  'Sm'  -0.1638   3.4418
 'International Tables Vol C Tables 4.2.6.8 and 6.1.1.4'
 
_symmetry_cell_setting            monoclinic
_symmetry_space_group_name_H-M    P2(1)/c
 
loop_
 _symmetry_equiv_pos_as_xyz
 'x, y, z'
 '-x, y+1/2, -z+1/2'
 '-x, -y, -z'
 'x, -y-1/2, z-1/2'
 
_cell_length_a                    15.491(4)
_cell_length_b                    18.840(5)
_cell_length_c                    16.136(4)
_cell_angle_alpha                 90.00
_cell_angle_beta                  103.266(4)
_cell_angle_gamma                 90.00
_cell_volume                      4583.6(19)
_cell_formula_units_Z             4
_cell_measurement_temperature     100(2)
_cell_measurement_reflns_used     15361
_cell_measurement_theta_min       4.314
_cell_measurement_theta_max       52.518
 
_exptl_crystal_description        blocks
_exptl_crystal_colour             black
_exptl_crystal_size_max           0.22
_exptl_crystal_size_mid           0.17
_exptl_crystal_size_min           0.11
_exptl_crystal_density_meas       ?
_exptl_crystal_density_diffrn     1.229
_exptl_crystal_density_method     'not measured'
_exptl_crystal_F_000              1784
_exptl_absorpt_coefficient_mu     1.516
_exptl_absorpt_correction_type    multi-scan
_exptl_absorpt_correction_T_min   0.7314
_exptl_absorpt_correction_T_max   0.8509
_exptl_absorpt_process_details    SADABS
 
_exptl_special_details
;
 ?
;
 
_diffrn_ambient_temperature       100(2)
_diffrn_radiation_wavelength      0.71073
_diffrn_radiation_type            MoK\a
_diffrn_radiation_source          'fine-focus sealed tube'
_diffrn_radiation_monochromator   graphite
_diffrn_measurement_device_type   'SMART APEX'
_diffrn_measurement_method        '\w scans'
_diffrn_detector_area_resol_mean  ?
_diffrn_standards_number          ?
_diffrn_standards_interval_count  ?
_diffrn_standards_interval_time   ?
_diffrn_standards_decay_%         ?
_diffrn_reflns_number             35696
_diffrn_reflns_av_R_equivalents   0.0436
_diffrn_reflns_av_sigmaI/netI     0.0388
_diffrn_reflns_limit_h_min        -19
_diffrn_reflns_limit_h_max        19
_diffrn_reflns_limit_k_min        -23
_diffrn_reflns_limit_k_max        23
_diffrn_reflns_limit_l_min        -20
_diffrn_reflns_limit_l_max        20
_diffrn_reflns_theta_min          1.69
_diffrn_reflns_theta_max          26.35
_reflns_number_total              9288
_reflns_number_gt                 8063
_reflns_threshold_expression      >2sigma(I)
 
_computing_data_collection        'Bruker XSCANS' 
_computing_cell_refinement        'Bruker XSCANS' 
_computing_data_reduction         'Bruker SHELXTL' 
_computing_structure_solution     'SHELXS-97 (Sheldrick, 1990)' 
_computing_structure_refinement   'SHELXL-97 (Sheldrick, 1997)' 
_computing_molecular_graphics     'Bruker SHELXTL' 
_computing_publication_material   'Bruker SHELXTL'
 
_refine_special_details
;
 Refinement of F^2^ against ALL reflections.  The weighted R-factor wR and
 goodness of fit S are based on F^2^, conventional R-factors R are based
 on F, with F set to zero for negative F^2^. The threshold expression of
 F^2^ > 2sigma(F^2^) is used only for calculating R-factors(gt) etc. and is
 not relevant to the choice of reflections for refinement.  R-factors based
 on F^2^ are statistically about twice as large as those based on F, and R-
 factors based on ALL data will be even larger.
;
 
_refine_ls_structure_factor_coef  Fsqd
_refine_ls_matrix_type            full
_refine_ls_weighting_scheme       calc
_refine_ls_weighting_details
 'calc w=1/[\s^2^(Fo^2^)+(0.0593P)^2^+0.0000P] where P=(Fo^2^+2Fc^2^)/3'
_atom_sites_solution_primary      direct
_atom_sites_solution_secondary    difmap
_atom_sites_solution_hydrogens    geom
_refine_ls_hydrogen_treatment     constr
_refine_ls_extinction_method      none
_refine_ls_extinction_coef        ?
_refine_ls_number_reflns          9288
_refine_ls_number_parameters      386
_refine_ls_number_restraints      0
_refine_ls_R_factor_all           0.0489
_refine_ls_R_factor_gt            0.0406
_refine_ls_wR_factor_ref          0.0979
_refine_ls_wR_factor_gt           0.0942
_refine_ls_goodness_of_fit_ref    1.079
_refine_ls_restrained_S_all       1.079
_refine_ls_shift/su_max           0.001
_refine_ls_shift/su_mean          0.000
 
loop_
 _atom_site_label
 _atom_site_type_symbol
 _atom_site_fract_x
 _atom_site_fract_y
 _atom_site_fract_z
 _atom_site_U_iso_or_equiv
 _atom_site_adp_type
 _atom_site_occupancy
 _atom_site_symmetry_multiplicity
 _atom_site_calc_flag
 _atom_site_refinement_flags
 _atom_site_disorder_assembly
 _atom_site_disorder_group
C1 C 0.5343(2) 0.6889(2) 0.4342(2) 0.0314(8) Uani 1 1 d . . .
H1A H 0.5906 0.6818 0.4173 0.047 Uiso 1 1 calc R . .
H1B H 0.5209 0.6469 0.4647 0.047 Uiso 1 1 calc R . .
H1C H 0.5391 0.7305 0.4715 0.047 Uiso 1 1 calc R . .
C2 C 0.4767(3) 0.78581(19) 0.2853(3) 0.0364(9) Uani 1 1 d . . .
H2A H 0.4849 0.8251 0.3262 0.055 Uiso 1 1 calc R . .
H2B H 0.4305 0.7983 0.2350 0.055 Uiso 1 1 calc R . .
H2C H 0.5326 0.7768 0.2683 0.055 Uiso 1 1 calc R . .
C3 C 0.3409(2) 0.7268(2) 0.3756(2) 0.0368(9) Uani 1 1 d . . .
H3A H 0.3264 0.6876 0.4098 0.055 Uiso 1 1 calc R . .
H3B H 0.2910 0.7352 0.3269 0.055 Uiso 1 1 calc R . .
H3C H 0.3522 0.7698 0.4106 0.055 Uiso 1 1 calc R . .
C4 C 0.5536(3) 0.5108(2) 0.1401(3) 0.0399(10) Uani 1 1 d . . .
H4A H 0.6052 0.5129 0.1146 0.060 Uiso 1 1 calc R . .
H4B H 0.5008 0.4981 0.0963 0.060 Uiso 1 1 calc R . .
H4C H 0.5637 0.4750 0.1854 0.060 Uiso 1 1 calc R . .
C5 C 0.6439(2) 0.6239(2) 0.2624(3) 0.0371(9) Uani 1 1 d . . .
H5A H 0.6504 0.5957 0.3146 0.056 Uiso 1 1 calc R . .
H5B H 0.6436 0.6745 0.2765 0.056 Uiso 1 1 calc R . .
H5C H 0.6935 0.6139 0.2359 0.056 Uiso 1 1 calc R . .
C6 C 0.5271(3) 0.6656(2) 0.0958(3) 0.0422(10) Uani 1 1 d . . .
H6A H 0.5809 0.6634 0.0737 0.063 Uiso 1 1 calc R . .
H6B H 0.5201 0.7136 0.1166 0.063 Uiso 1 1 calc R . .
H6C H 0.4755 0.6537 0.0502 0.063 Uiso 1 1 calc R . .
C7 C 0.2861(2) 0.73229(18) 0.1160(2) 0.0295(8) Uani 1 1 d . . .
H7A H 0.2359 0.7384 0.0669 0.044 Uiso 1 1 calc R . .
H7B H 0.3408 0.7479 0.1007 0.044 Uiso 1 1 calc R . .
H7C H 0.2762 0.7608 0.1638 0.044 Uiso 1 1 calc R . .
C8 C 0.2831(2) 0.5858(2) 0.0449(2) 0.0296(8) Uani 1 1 d . . .
H8A H 0.2690 0.5362 0.0542 0.044 Uiso 1 1 calc R . .
H8B H 0.3386 0.5881 0.0255 0.044 Uiso 1 1 calc R . .
H8C H 0.2350 0.6068 0.0016 0.044 Uiso 1 1 calc R . .
C9 C 0.0807(3) 0.7306(2) 0.1692(3) 0.0385(10) Uani 1 1 d . . .
H9A H 0.1189 0.7520 0.2200 0.058 Uiso 1 1 calc R . .
H9B H 0.0185 0.7415 0.1680 0.058 Uiso 1 1 calc R . .
H9C H 0.0961 0.7499 0.1181 0.058 Uiso 1 1 calc R . .
C10 C 0.0468(2) 0.5991(2) 0.0616(2) 0.0369(9) Uani 1 1 d . . .
H10A H 0.0804 0.6181 0.0221 0.055 Uiso 1 1 calc R . .
H10B H -0.0149 0.6151 0.0445 0.055 Uiso 1 1 calc R . .
H10C H 0.0486 0.5471 0.0605 0.055 Uiso 1 1 calc R . .
C11 C -0.0055(3) 0.6082(2) 0.4687(2) 0.0379(9) Uani 1 1 d . . .
H11A H 0.0481 0.5818 0.4957 0.057 Uiso 1 1 calc R . .
H11B H -0.0558 0.5754 0.4539 0.057 Uiso 1 1 calc R . .
H11C H -0.0178 0.6443 0.5082 0.057 Uiso 1 1 calc R . .
C12 C -0.0940(2) 0.7020(2) 0.3216(3) 0.0381(9) Uani 1 1 d . . .
H12A H -0.1046 0.7380 0.3619 0.057 Uiso 1 1 calc R . .
H12B H -0.1438 0.6685 0.3096 0.057 Uiso 1 1 calc R . .
H12C H -0.0887 0.7251 0.2685 0.057 Uiso 1 1 calc R . .
C13 C 0.0974(3) 0.7237(2) 0.4051(2) 0.0343(9) Uani 1 1 d . . .
H13A H 0.1000 0.7547 0.3570 0.052 Uiso 1 1 calc R . .
H13B H 0.1555 0.7016 0.4266 0.052 Uiso 1 1 calc R . .
H13C H 0.0814 0.7517 0.4505 0.052 Uiso 1 1 calc R . .
C14 C -0.1571(2) 0.5519(2) 0.1365(2) 0.0331(9) Uani 1 1 d . . .
H14A H -0.1335 0.5565 0.0853 0.050 Uiso 1 1 calc R . .
H14B H -0.1696 0.5991 0.1563 0.050 Uiso 1 1 calc R . .
H14C H -0.2120 0.5240 0.1230 0.050 Uiso 1 1 calc R . .
C15 C -0.1336(3) 0.4813(2) 0.3071(3) 0.0390(10) Uani 1 1 d . . .
H15A H -0.1534 0.5246 0.3308 0.058 Uiso 1 1 calc R . .
H15B H -0.0938 0.4547 0.3526 0.058 Uiso 1 1 calc R . .
H15C H -0.1851 0.4518 0.2820 0.058 Uiso 1 1 calc R . .
C16 C -0.0466(3) 0.4190(2) 0.1755(3) 0.0390(10) Uani 1 1 d . . .
H16A H -0.1018 0.3932 0.1521 0.058 Uiso 1 1 calc R . .
H16B H -0.0085 0.3902 0.2198 0.058 Uiso 1 1 calc R . .
H16C H -0.0158 0.4284 0.1299 0.058 Uiso 1 1 calc R . .
C17 C 0.3157(2) 0.3775(2) 0.0745(2) 0.0302(8) Uani 1 1 d . . .
H17A H 0.3074 0.4113 0.0263 0.036 Uiso 1 1 calc R . .
H17B H 0.3597 0.3411 0.0679 0.036 Uiso 1 1 calc R . .
C18 C 0.3435(2) 0.4156(2) 0.1597(2) 0.0296(8) Uani 1 1 d . . .
H18A H 0.3784 0.3836 0.2035 0.036 Uiso 1 1 calc R . .
H18B H 0.3799 0.4579 0.1546 0.036 Uiso 1 1 calc R . .
C19 C 0.2285(2) 0.3440(2) 0.0812(2) 0.0345(9) Uani 1 1 d . . .
H19A H 0.1907 0.3337 0.0242 0.041 Uiso 1 1 calc R . .
H19B H 0.2385 0.2995 0.1148 0.041 Uiso 1 1 calc R . .
C20 C 0.1873(2) 0.4007(2) 0.1265(2) 0.0320(8) Uani 1 1 d . . .
H20A H 0.1523 0.4345 0.0851 0.038 Uiso 1 1 calc R . .
H20B H 0.1480 0.3791 0.1600 0.038 Uiso 1 1 calc R . .
C21 C 0.2884(3) 0.32839(19) 0.3499(2) 0.0350(9) Uani 1 1 d . . .
H21A H 0.3539 0.3248 0.3646 0.042 Uiso 1 1 calc R . .
H21B H 0.2671 0.3204 0.2879 0.042 Uiso 1 1 calc R . .
C22 C 0.2490(2) 0.27424(19) 0.3985(2) 0.0326(9) Uani 1 1 d . . .
H22A H 0.2918 0.2599 0.4514 0.039 Uiso 1 1 calc R . .
H22B H 0.2293 0.2316 0.3635 0.039 Uiso 1 1 calc R . .
C23 C 0.1709(3) 0.3138(2) 0.4182(3) 0.0467(11) Uani 1 1 d . . .
H23A H 0.1187 0.3118 0.3697 0.056 Uiso 1 1 calc R . .
H23B H 0.1546 0.2943 0.4695 0.056 Uiso 1 1 calc R . .
C24 C 0.2055(3) 0.3875(2) 0.4331(3) 0.0411(10) Uani 1 1 d . . .
H24A H 0.1562 0.4222 0.4228 0.049 Uiso 1 1 calc R . .
H24B H 0.2406 0.3932 0.4923 0.049 Uiso 1 1 calc R . .
C25 C 0.3959(2) 0.5266(2) 0.5048(2) 0.0318(9) Uani 1 1 d . . .
H25A H 0.4362 0.5401 0.4678 0.038 Uiso 1 1 calc R . .
H25B H 0.4016 0.4749 0.5161 0.038 Uiso 1 1 calc R . .
C26 C 0.4177(2) 0.5680(2) 0.5871(2) 0.0382(10) Uani 1 1 d . . .
H26A H 0.4357 0.6172 0.5778 0.046 Uiso 1 1 calc R . .
H26B H 0.4653 0.5447 0.6299 0.046 Uiso 1 1 calc R . .
C27 C 0.3292(2) 0.5661(2) 0.6137(2) 0.0315(8) Uani 1 1 d . . .
H27A H 0.3221 0.5211 0.6431 0.038 Uiso 1 1 calc R . .
H27B H 0.3240 0.6064 0.6516 0.038 Uiso 1 1 calc R . .
C28 C 0.2623(3) 0.5718(2) 0.5301(2) 0.0370(9) Uani 1 1 d . . .
H28A H 0.2090 0.5433 0.5315 0.044 Uiso 1 1 calc R . .
H28B H 0.2442 0.6218 0.5182 0.044 Uiso 1 1 calc R . .
O1 O 0.20753(14) 0.61638(11) 0.18810(13) 0.0196(5) Uani 1 1 d . . .
O2 O 0.26171(15) 0.43630(13) 0.18206(14) 0.0251(5) Uani 1 1 d . . .
O4 O 0.26089(19) 0.39740(13) 0.37270(17) 0.0376(7) Uani 1 1 d . . .
O5 O 0.30521(15) 0.54488(13) 0.46501(14) 0.0271(5) Uani 1 1 d . . .
Si1 Si 0.41837(6) 0.60020(5) 0.25431(6) 0.0201(2) Uani 1 1 d . . .
Si2 Si 0.44264(6) 0.70357(5) 0.33616(6) 0.0242(2) Uani 1 1 d . . .
Si3 Si 0.53635(6) 0.60002(5) 0.18612(6) 0.0271(2) Uani 1 1 d . . .
Si4 Si 0.29623(6) 0.63651(5) 0.14747(6) 0.0201(2) Uani 1 1 d . . .
Si5 Si 0.05732(6) 0.56777(5) 0.28287(6) 0.0202(2) Uani 1 1 d . . .
Si6 Si 0.09719(6) 0.63132(5) 0.17239(6) 0.0214(2) Uani 1 1 d . . .
Si7 Si 0.01185(6) 0.65270(5) 0.36902(6) 0.0246(2) Uani 1 1 d . . .
Si8 Si -0.07288(6) 0.50559(5) 0.22264(6) 0.0233(2) Uani 1 1 d . . .
Sm1 Sm 0.256377(10) 0.521071(9) 0.304971(10) 0.01783(7) Uani 1 1 d . . .
 
loop_
 _atom_site_aniso_label
 _atom_site_aniso_U_11
 _atom_site_aniso_U_22
 _atom_site_aniso_U_33
 _atom_site_aniso_U_23
 _atom_site_aniso_U_13
 _atom_site_aniso_U_12
C1 0.0298(19) 0.031(2) 0.0278(19) -0.0042(16) -0.0055(15) -0.0015(16)
C2 0.032(2) 0.0262(19) 0.044(2) 0.0014(17) -0.0058(18) -0.0086(16)
C3 0.031(2) 0.042(2) 0.035(2) -0.0081(18) 0.0023(17) -0.0017(18)
C4 0.035(2) 0.047(2) 0.044(2) -0.006(2) 0.0200(19) -0.0008(19)
C5 0.0201(18) 0.047(2) 0.043(2) 0.0002(19) 0.0047(17) -0.0025(17)
C6 0.036(2) 0.053(3) 0.040(2) 0.012(2) 0.0127(19) -0.007(2)
C7 0.0244(18) 0.0298(19) 0.031(2) 0.0095(16) -0.0002(15) -0.0034(15)
C8 0.0261(18) 0.041(2) 0.0202(17) 0.0005(16) 0.0024(14) -0.0042(17)
C9 0.039(2) 0.032(2) 0.047(2) 0.0150(18) 0.0148(19) 0.0127(18)
C10 0.0252(19) 0.061(3) 0.0212(19) 0.0021(18) -0.0018(15) -0.0061(18)
C11 0.042(2) 0.046(2) 0.028(2) -0.0022(18) 0.0127(17) 0.009(2)
C12 0.027(2) 0.044(2) 0.041(2) -0.0067(19) 0.0027(17) 0.0089(18)
C13 0.035(2) 0.034(2) 0.030(2) -0.0090(17) -0.0015(16) 0.0008(17)
C14 0.0204(18) 0.045(2) 0.030(2) 0.0002(18) -0.0035(15) -0.0009(17)
C15 0.031(2) 0.055(3) 0.030(2) 0.0030(19) 0.0068(17) -0.0135(19)
C16 0.039(2) 0.037(2) 0.037(2) -0.0081(18) 0.0001(18) -0.0031(18)
C17 0.0289(19) 0.033(2) 0.0291(19) -0.0032(16) 0.0067(15) 0.0045(16)
C18 0.0194(17) 0.039(2) 0.031(2) -0.0111(17) 0.0074(15) 0.0024(16)
C19 0.032(2) 0.034(2) 0.034(2) -0.0055(17) 0.0010(16) -0.0063(17)
C20 0.0221(18) 0.036(2) 0.034(2) -0.0061(17) -0.0012(15) -0.0025(16)
C21 0.048(2) 0.0235(19) 0.033(2) 0.0051(16) 0.0090(18) 0.0075(17)
C22 0.031(2) 0.0241(18) 0.038(2) 0.0001(16) -0.0008(17) -0.0004(16)
C23 0.032(2) 0.040(2) 0.068(3) 0.011(2) 0.011(2) -0.0013(19)
C24 0.049(3) 0.035(2) 0.045(2) 0.0089(19) 0.024(2) 0.006(2)
C25 0.0215(18) 0.044(2) 0.0258(19) 0.0040(16) -0.0023(15) 0.0079(16)
C26 0.0241(19) 0.057(3) 0.030(2) -0.0029(19) 0.0000(16) -0.0008(19)
C27 0.035(2) 0.035(2) 0.0238(19) -0.0007(16) 0.0055(16) -0.0005(17)
C28 0.028(2) 0.053(3) 0.028(2) -0.0031(18) 0.0042(16) 0.0079(19)
O1 0.0159(11) 0.0224(12) 0.0186(11) 0.0039(9) -0.0002(9) -0.0003(9)
O2 0.0197(12) 0.0279(13) 0.0268(13) -0.0053(10) 0.0032(10) 0.0008(10)
O4 0.0534(18) 0.0266(14) 0.0382(16) 0.0053(12) 0.0215(14) 0.0037(13)
O5 0.0206(12) 0.0379(14) 0.0204(12) 0.0010(11) -0.0004(10) 0.0064(11)
Si1 0.0150(4) 0.0236(5) 0.0194(5) 0.0010(4) -0.0006(3) -0.0028(4)
Si2 0.0204(5) 0.0250(5) 0.0239(5) -0.0019(4) -0.0016(4) -0.0027(4)
Si3 0.0198(5) 0.0327(5) 0.0287(5) 0.0022(4) 0.0055(4) -0.0030(4)
Si4 0.0170(4) 0.0243(5) 0.0173(4) 0.0024(4) 0.0005(3) -0.0033(4)
Si5 0.0146(4) 0.0262(5) 0.0188(5) -0.0005(4) 0.0016(3) 0.0017(4)
Si6 0.0157(4) 0.0271(5) 0.0192(5) 0.0028(4) -0.0007(3) 0.0020(4)
Si7 0.0205(5) 0.0303(5) 0.0206(5) -0.0029(4) -0.0001(4) 0.0049(4)
Si8 0.0184(5) 0.0299(5) 0.0205(5) -0.0009(4) 0.0022(4) -0.0021(4)
Sm1 0.01534(10) 0.01945(10) 0.01778(10) 0.00193(6) 0.00193(7) 0.00104(6)
 
_geom_special_details
;
 All esds (except the esd in the dihedral angle between two l.s. planes)
 are estimated using the full covariance matrix.  The cell esds are taken
 into account individually in the estimation of esds in distances, angles
 and torsion angles; correlations between esds in cell parameters are only
 used when they are defined by crystal symmetry.  An approximate (isotropic)
 treatment of cell esds is used for estimating esds involving l.s. planes.
;
 
loop_
 _geom_bond_atom_site_label_1
 _geom_bond_atom_site_label_2
 _geom_bond_distance
 _geom_bond_site_symmetry_2
 _geom_bond_publ_flag
C1 Si2 1.888(4) . ?
C2 Si2 1.884(4) . ?
C3 Si2 1.882(4) . ?
C4 Si3 1.881(4) . ?
C5 Si3 1.885(4) . ?
C6 Si3 1.890(4) . ?
C7 Si4 1.872(4) . ?
C8 Si4 1.881(4) . ?
C9 Si6 1.887(4) . ?
C10 Si6 1.880(4) . ?
C11 Si7 1.887(4) . ?
C12 Si7 1.888(4) . ?
C13 Si7 1.879(4) . ?
C14 Si8 1.888(4) . ?
C15 Si8 1.882(4) . ?
C16 Si8 1.885(4) . ?
C17 C19 1.518(5) . ?
C17 C18 1.523(5) . ?
C18 O2 1.448(4) . ?
C19 C20 1.516(5) . ?
C20 O2 1.451(4) . ?
C21 O4 1.442(4) . ?
C21 C22 1.500(5) . ?
C22 C23 1.515(5) . ?
C23 C24 1.488(6) . ?
C24 O4 1.451(4) . ?
C25 O5 1.446(4) . ?
C25 C26 1.509(5) . ?
C26 C27 1.529(5) . ?
C27 C28 1.505(5) . ?
C28 O5 1.457(4) . ?
O1 Si6 1.693(2) . ?
O1 Si4 1.696(2) . ?
O1 Sm1 2.588(2) . ?
O2 Sm1 2.562(2) . ?
O4 Sm1 2.568(3) . ?
O5 Sm1 2.558(2) . ?
Si1 Si2 2.3347(14) . ?
Si1 Si3 2.3396(14) . ?
Si1 Si4 2.3501(13) . ?
Si1 Sm1 3.1827(10) . ?
Si5 Si7 2.3320(13) . ?
Si5 Si8 2.3420(14) . ?
Si5 Si6 2.3448(13) . ?
Si5 Sm1 3.1472(11) . ?
 
loop_
 _geom_angle_atom_site_label_1
 _geom_angle_atom_site_label_2
 _geom_angle_atom_site_label_3
 _geom_angle
 _geom_angle_site_symmetry_1
 _geom_angle_site_symmetry_3
 _geom_angle_publ_flag
C19 C17 C18 101.7(3) . . ?
O2 C18 C17 105.7(3) . . ?
C20 C19 C17 102.8(3) . . ?
O2 C20 C19 105.1(3) . . ?
O4 C21 C22 107.5(3) . . ?
C21 C22 C23 102.4(3) . . ?
C24 C23 C22 102.6(3) . . ?
O4 C24 C23 104.9(3) . . ?
O5 C25 C26 105.4(3) . . ?
C25 C26 C27 101.6(3) . . ?
C28 C27 C26 102.9(3) . . ?
O5 C28 C27 106.7(3) . . ?
Si6 O1 Si4 141.71(14) . . ?
Si6 O1 Sm1 109.92(10) . . ?
Si4 O1 Sm1 108.03(10) . . ?
C18 O2 C20 109.8(2) . . ?
C18 O2 Sm1 123.09(19) . . ?
C20 O2 Sm1 127.13(19) . . ?
C21 O4 C24 108.1(3) . . ?
C21 O4 Sm1 133.6(2) . . ?
C24 O4 Sm1 116.1(2) . . ?
C25 O5 C28 108.7(3) . . ?
C25 O5 Sm1 116.0(2) . . ?
C28 O5 Sm1 135.30(19) . . ?
Si2 Si1 Si3 103.04(5) . . ?
Si2 Si1 Si4 99.80(5) . . ?
Si3 Si1 Si4 103.87(5) . . ?
Si2 Si1 Sm1 106.23(4) . . ?
Si3 Si1 Sm1 150.13(5) . . ?
Si4 Si1 Sm1 77.01(4) . . ?
C3 Si2 C2 107.22(19) . . ?
C3 Si2 C1 106.17(17) . . ?
C2 Si2 C1 104.63(17) . . ?
C3 Si2 Si1 110.29(13) . . ?
C2 Si2 Si1 117.68(14) . . ?
C1 Si2 Si1 110.15(12) . . ?
C4 Si3 C5 106.69(19) . . ?
C4 Si3 C6 105.8(2) . . ?
C5 Si3 C6 104.29(18) . . ?
C4 Si3 Si1 112.59(13) . . ?
C5 Si3 Si1 111.16(13) . . ?
C6 Si3 Si1 115.62(14) . . ?
O1 Si4 C7 107.19(14) . . ?
O1 Si4 C8 107.05(14) . . ?
C7 Si4 C8 105.38(17) . . ?
O1 Si4 Si1 103.81(9) . . ?
C7 Si4 Si1 118.89(12) . . ?
C8 Si4 Si1 113.81(12) . . ?
Si7 Si5 Si8 103.97(5) . . ?
Si7 Si5 Si6 105.73(5) . . ?
Si8 Si5 Si6 106.97(5) . . ?
Si7 Si5 Sm1 123.12(4) . . ?
Si8 Si5 Sm1 129.44(5) . . ?
Si6 Si5 Sm1 78.86(3) . . ?
O1 Si6 C10 105.87(15) . . ?
O1 Si6 C9 107.13(15) . . ?
C10 Si6 C9 105.71(19) . . ?
O1 Si6 Si5 103.55(8) . . ?
C10 Si6 Si5 115.69(13) . . ?
C9 Si6 Si5 117.97(13) . . ?
C13 Si7 C11 106.29(18) . . ?
C13 Si7 C12 105.14(18) . . ?
C11 Si7 C12 106.49(18) . . ?
C13 Si7 Si5 112.63(13) . . ?
C11 Si7 Si5 108.96(13) . . ?
C12 Si7 Si5 116.69(13) . . ?
C15 Si8 C16 105.79(19) . . ?
C15 Si8 C14 105.69(18) . . ?
C16 Si8 C14 106.23(18) . . ?
C15 Si8 Si5 110.31(13) . . ?
C16 Si8 Si5 110.81(13) . . ?
C14 Si8 Si5 117.28(13) . . ?
O5 Sm1 O2 146.71(8) . . ?
O5 Sm1 O4 75.91(8) . . ?
O2 Sm1 O4 76.19(8) . . ?
O5 Sm1 O1 125.67(7) . . ?
O2 Sm1 O1 85.67(8) . . ?
O4 Sm1 O1 156.14(8) . . ?
O5 Sm1 Si5 96.92(5) . . ?
O2 Sm1 Si5 106.94(5) . . ?
O4 Sm1 Si5 103.42(7) . . ?
O1 Sm1 Si5 66.95(5) . . ?
O5 Sm1 Si1 96.27(6) . . ?
O2 Sm1 Si1 85.75(6) . . ?
O4 Sm1 Si1 126.04(6) . . ?
O1 Sm1 Si1 66.66(5) . . ?
Si5 Sm1 Si1 130.52(3) . . ?
 
loop_
 _geom_torsion_atom_site_label_1
 _geom_torsion_atom_site_label_2
 _geom_torsion_atom_site_label_3
 _geom_torsion_atom_site_label_4
 _geom_torsion
 _geom_torsion_site_symmetry_1
 _geom_torsion_site_symmetry_2
 _geom_torsion_site_symmetry_3
 _geom_torsion_site_symmetry_4
 _geom_torsion_publ_flag
C19 C17 C18 O2 -31.4(4) . . . . ?
C18 C17 C19 C20 38.3(4) . . . . ?
C17 C19 C20 O2 -31.9(4) . . . . ?
O4 C21 C22 C23 22.8(4) . . . . ?
C21 C22 C23 C24 -35.9(4) . . . . ?
C22 C23 C24 O4 36.5(4) . . . . ?
O5 C25 C26 C27 35.8(4) . . . . ?
C25 C26 C27 C28 -36.7(4) . . . . ?
C26 C27 C28 O5 25.0(4) . . . . ?
C17 C18 O2 C20 12.1(4) . . . . ?
C17 C18 O2 Sm1 -169.3(2) . . . . ?
C19 C20 O2 C18 12.4(4) . . . . ?
C19 C20 O2 Sm1 -166.1(2) . . . . ?
C22 C21 O4 C24 -0.5(4) . . . . ?
C22 C21 O4 Sm1 -162.5(2) . . . . ?
C23 C24 O4 C21 -22.8(4) . . . . ?
C23 C24 O4 Sm1 142.8(3) . . . . ?
C26 C25 O5 C28 -21.1(4) . . . . ?
C26 C25 O5 Sm1 160.4(2) . . . . ?
C27 C28 O5 C25 -2.8(4) . . . . ?
C27 C28 O5 Sm1 175.2(2) . . . . ?
Si3 Si1 Si2 C3 165.94(14) . . . . ?
Si4 Si1 Si2 C3 59.10(14) . . . . ?
Sm1 Si1 Si2 C3 -20.11(14) . . . . ?
Si3 Si1 Si2 C2 42.56(15) . . . . ?
Si4 Si1 Si2 C2 -64.28(15) . . . . ?
Sm1 Si1 Si2 C2 -143.49(14) . . . . ?
Si3 Si1 Si2 C1 -77.20(14) . . . . ?
Si4 Si1 Si2 C1 175.96(14) . . . . ?
Sm1 Si1 Si2 C1 96.76(14) . . . . ?
Si2 Si1 Si3 C4 163.62(16) . . . . ?
Si4 Si1 Si3 C4 -92.67(16) . . . . ?
Sm1 Si1 Si3 C4 -4.67(19) . . . . ?
Si2 Si1 Si3 C5 43.98(15) . . . . ?
Si4 Si1 Si3 C5 147.70(15) . . . . ?
Sm1 Si1 Si3 C5 -124.30(16) . . . . ?
Si2 Si1 Si3 C6 -74.65(16) . . . . ?
Si4 Si1 Si3 C6 29.06(16) . . . . ?
Sm1 Si1 Si3 C6 117.06(17) . . . . ?
Si6 O1 Si4 C7 40.2(3) . . . . ?
Sm1 O1 Si4 C7 -147.68(13) . . . . ?
Si6 O1 Si4 C8 -72.4(3) . . . . ?
Sm1 O1 Si4 C8 99.66(15) . . . . ?
Si6 O1 Si4 Si1 166.9(2) . . . . ?
Sm1 O1 Si4 Si1 -21.03(10) . . . . ?
Si2 Si1 Si4 O1 -88.01(9) . . . . ?
Si3 Si1 Si4 O1 165.82(9) . . . . ?
Sm1 Si1 Si4 O1 16.54(8) . . . . ?
Si2 Si1 Si4 C7 30.89(15) . . . . ?
Si3 Si1 Si4 C7 -75.27(15) . . . . ?
Sm1 Si1 Si4 C7 135.45(14) . . . . ?
Si2 Si1 Si4 C8 155.98(13) . . . . ?
Si3 Si1 Si4 C8 49.81(14) . . . . ?
Sm1 Si1 Si4 C8 -99.47(13) . . . . ?
Si4 O1 Si6 C10 58.3(3) . . . . ?
Sm1 O1 Si6 C10 -113.70(16) . . . . ?
Si4 O1 Si6 C9 -54.2(3) . . . . ?
Sm1 O1 Si6 C9 133.82(15) . . . . ?
Si4 O1 Si6 Si5 -179.6(2) . . . . ?
Sm1 O1 Si6 Si5 8.44(11) . . . . ?
Si7 Si5 Si6 O1 114.90(9) . . . . ?
Si8 Si5 Si6 O1 -134.73(9) . . . . ?
Sm1 Si5 Si6 O1 -6.64(8) . . . . ?
Si7 Si5 Si6 C10 -129.76(15) . . . . ?
Si8 Si5 Si6 C10 -19.38(16) . . . . ?
Sm1 Si5 Si6 C10 108.70(15) . . . . ?
Si7 Si5 Si6 C9 -3.20(16) . . . . ?
Si8 Si5 Si6 C9 107.18(16) . . . . ?
Sm1 Si5 Si6 C9 -124.74(16) . . . . ?
Si8 Si5 Si7 C13 -166.48(14) . . . . ?
Si6 Si5 Si7 C13 -53.99(14) . . . . ?
Sm1 Si5 Si7 C13 32.81(15) . . . . ?
Si8 Si5 Si7 C11 75.84(14) . . . . ?
Si6 Si5 Si7 C11 -171.67(14) . . . . ?
Sm1 Si5 Si7 C11 -84.88(15) . . . . ?
Si8 Si5 Si7 C12 -44.73(16) . . . . ?
Si6 Si5 Si7 C12 67.76(16) . . . . ?
Sm1 Si5 Si7 C12 154.56(15) . . . . ?
Si7 Si5 Si8 C15 -47.24(15) . . . . ?
Si6 Si5 Si8 C15 -158.83(15) . . . . ?
Sm1 Si5 Si8 C15 111.77(15) . . . . ?
Si7 Si5 Si8 C16 -164.04(15) . . . . ?
Si6 Si5 Si8 C16 84.36(15) . . . . ?
Sm1 Si5 Si8 C16 -5.03(16) . . . . ?
Si7 Si5 Si8 C14 73.78(15) . . . . ?
Si6 Si5 Si8 C14 -37.81(15) . . . . ?
Sm1 Si5 Si8 C14 -127.21(14) . . . . ?
C25 O5 Sm1 O2 41.0(3) . . . . ?
C28 O5 Sm1 O2 -136.9(3) . . . . ?
C25 O5 Sm1 O4 74.9(2) . . . . ?
C28 O5 Sm1 O4 -103.1(3) . . . . ?
C25 O5 Sm1 O1 -116.4(2) . . . . ?
C28 O5 Sm1 O1 65.6(3) . . . . ?
C25 O5 Sm1 Si5 177.0(2) . . . . ?
C28 O5 Sm1 Si5 -0.9(3) . . . . ?
C25 O5 Sm1 Si1 -50.8(2) . . . . ?
C28 O5 Sm1 Si1 131.3(3) . . . . ?
C18 O2 Sm1 O5 -59.9(3) . . . . ?
C20 O2 Sm1 O5 118.5(3) . . . . ?
C18 O2 Sm1 O4 -93.7(3) . . . . ?
C20 O2 Sm1 O4 84.7(3) . . . . ?
C18 O2 Sm1 O1 101.9(2) . . . . ?
C20 O2 Sm1 O1 -79.7(3) . . . . ?
C18 O2 Sm1 Si5 166.3(2) . . . . ?
C20 O2 Sm1 Si5 -15.4(3) . . . . ?
C18 O2 Sm1 Si1 35.1(2) . . . . ?
C20 O2 Sm1 Si1 -146.6(3) . . . . ?
C21 O4 Sm1 O5 -141.3(3) . . . . ?
C24 O4 Sm1 O5 57.7(3) . . . . ?
C21 O4 Sm1 O2 20.4(3) . . . . ?
C24 O4 Sm1 O2 -140.6(3) . . . . ?
C21 O4 Sm1 O1 61.9(4) . . . . ?
C24 O4 Sm1 O1 -99.0(3) . . . . ?
C21 O4 Sm1 Si5 124.8(3) . . . . ?
C24 O4 Sm1 Si5 -36.2(3) . . . . ?
C21 O4 Sm1 Si1 -53.8(3) . . . . ?
C24 O4 Sm1 Si1 145.2(2) . . . . ?
Si6 O1 Sm1 O5 -88.34(13) . . . . ?
Si4 O1 Sm1 O5 96.87(12) . . . . ?
Si6 O1 Sm1 O2 103.84(11) . . . . ?
Si4 O1 Sm1 O2 -70.96(11) . . . . ?
Si6 O1 Sm1 O4 63.6(2) . . . . ?
Si4 O1 Sm1 O4 -111.21(19) . . . . ?
Si6 O1 Sm1 Si5 -6.63(8) . . . . ?
Si4 O1 Sm1 Si5 178.57(12) . . . . ?
Si6 O1 Sm1 Si1 -168.93(12) . . . . ?
Si4 O1 Sm1 Si1 16.27(8) . . . . ?
Si7 Si5 Sm1 O5 28.89(8) . . . . ?
Si8 Si5 Sm1 O5 -126.59(8) . . . . ?
Si6 Si5 Sm1 O5 130.51(7) . . . . ?
Si7 Si5 Sm1 O2 -174.60(7) . . . . ?
Si8 Si5 Sm1 O2 29.92(8) . . . . ?
Si6 Si5 Sm1 O2 -72.98(7) . . . . ?
Si7 Si5 Sm1 O4 106.00(8) . . . . ?
Si8 Si5 Sm1 O4 -49.48(8) . . . . ?
Si6 Si5 Sm1 O4 -152.38(7) . . . . ?
Si7 Si5 Sm1 O1 -97.04(7) . . . . ?
Si8 Si5 Sm1 O1 107.49(8) . . . . ?
Si6 Si5 Sm1 O1 4.58(6) . . . . ?
Si7 Si5 Sm1 Si1 -75.49(6) . . . . ?
Si8 Si5 Sm1 Si1 129.03(5) . . . . ?
Si6 Si5 Sm1 Si1 26.13(5) . . . . ?
Si2 Si1 Sm1 O5 -41.05(7) . . . . ?
Si3 Si1 Sm1 O5 127.06(10) . . . . ?
Si4 Si1 Sm1 O5 -137.64(6) . . . . ?
Si2 Si1 Sm1 O2 172.32(6) . . . . ?
Si3 Si1 Sm1 O2 -19.57(10) . . . . ?
Si4 Si1 Sm1 O2 75.73(6) . . . . ?
Si2 Si1 Sm1 O4 -118.17(8) . . . . ?
Si3 Si1 Sm1 O4 49.94(12) . . . . ?
Si4 Si1 Sm1 O4 145.24(8) . . . . ?
Si2 Si1 Sm1 O1 85.21(7) . . . . ?
Si3 Si1 Sm1 O1 -106.68(10) . . . . ?
Si4 Si1 Sm1 O1 -11.38(6) . . . . ?
Si2 Si1 Sm1 Si5 63.62(5) . . . . ?
Si3 Si1 Sm1 Si5 -128.27(8) . . . . ?
Si4 Si1 Sm1 Si5 -32.97(5) . . . . ?
 
_diffrn_measured_fraction_theta_max    0.994
_diffrn_reflns_theta_full              26.35
_diffrn_measured_fraction_theta_full   0.994
_refine_diff_density_max    2.627
_refine_diff_density_min   -0.892
_refine_diff_density_rms    0.121

# SQUEEZE RESULTS (APPEND TO CIF)
# Note: Data are Listed for all Voids in the P1 Unit Cell
# i.e. Centre of Gravity, Solvent Accessible Volume,
# Recovered number of Electrons in the Void and
# Details about the Squeezed Material
loop_
  _platon_squeeze_void_nr
  _platon_squeeze_void_average_x
  _platon_squeeze_void_average_y
  _platon_squeeze_void_average_z
  _platon_squeeze_void_volume
  _platon_squeeze_void_count_electrons
  _platon_squeeze_void_content
   1  0.055  0.271  0.000         7         0 ' '
   2  0.055  0.229  0.500         7         0 ' '
   3  0.279  0.870  0.322        48         1 ' '
   4  0.279  0.630  0.822        48         1 ' '
   5  0.721  0.370  0.178        48         1 ' '
   6  0.721  0.130  0.678        48         1 ' '
   7  0.944  0.729  0.000         7         0 ' '
   8  0.944  0.771  0.500         7         0 ' '
_platon_squeeze_details
;
;


#===END
data_19_1187j
 
_audit_creation_method            SHELXL-97
_chemical_name_systematic
;
 ?
;
_chemical_name_common             ?
_chemical_melting_point           ?
_chemical_formula_moiety          ?
_chemical_formula_sum
 'C30 H86 O3 Si12 Yb'
_chemical_formula_weight          1005.11
 
loop_
 _atom_type_symbol
 _atom_type_description
 _atom_type_scat_dispersion_real
 _atom_type_scat_dispersion_imag
 _atom_type_scat_source
 'C'  'C'   0.0033   0.0016
 'International Tables Vol C Tables 4.2.6.8 and 6.1.1.4'
 'H'  'H'   0.0000   0.0000
 'International Tables Vol C Tables 4.2.6.8 and 6.1.1.4'
 'O'  'O'   0.0106   0.0060
 'International Tables Vol C Tables 4.2.6.8 and 6.1.1.4'
 'Si'  'Si'   0.0817   0.0704
 'International Tables Vol C Tables 4.2.6.8 and 6.1.1.4'
 'Yb'  'Yb'  -0.3850   5.5486
 'International Tables Vol C Tables 4.2.6.8 and 6.1.1.4'
 
_symmetry_cell_setting            triclinic
_symmetry_space_group_name_H-M    P-1
 
 
loop_
 _symmetry_equiv_pos_as_xyz
 'x, y, z'
 '-x, -y, -z'
 
_cell_length_a                    10.444(3)
_cell_length_b                    15.475(5)
_cell_length_c                    19.428(6)
_cell_angle_alpha                 67.632(5)
_cell_angle_beta                  86.605(5)
_cell_angle_gamma                 71.706(5)
_cell_volume                      2750.5(15)
_cell_formula_units_Z             2
_cell_measurement_temperature     100(2)
_cell_measurement_reflns_used     11227
_cell_measurement_theta_min       4.531
_cell_measurement_theta_max       52.518
 
_exptl_crystal_description        plates 
_exptl_crystal_colour             orange
_exptl_crystal_size_max           0.24
_exptl_crystal_size_mid           0.18
_exptl_crystal_size_min           0.07
_exptl_crystal_density_meas       ?
_exptl_crystal_density_diffrn     1.214
_exptl_crystal_density_method     'not measured'
_exptl_crystal_F_000              1056
_exptl_absorpt_coefficient_mu     1.986
_exptl_absorpt_correction_type    multi-scan
_exptl_absorpt_correction_T_min   0.6471 
_exptl_absorpt_correction_T_max   0.8735 
_exptl_absorpt_process_details    SADABS 
 
_exptl_special_details 
; 
 ? 
; 
 
_diffrn_ambient_temperature       100(2) 
_diffrn_radiation_wavelength      0.71073 
_diffrn_radiation_type            MoK\a 
_diffrn_radiation_source          'fine-focus sealed tube' 
_diffrn_radiation_monochromator   graphite
_diffrn_measurement_device_type   'SMART APEX''
_diffrn_measurement_method        '\w scans'
_diffrn_detector_area_resol_mean  ?
_diffrn_standards_number          ?
_diffrn_standards_interval_count  ?
_diffrn_standards_interval_time   ?
_diffrn_standards_decay_%         ?
_diffrn_reflns_number             21715
_diffrn_reflns_av_R_equivalents   0.0438
_diffrn_reflns_av_sigmaI/netI     0.0704
_diffrn_reflns_limit_h_min        -13
_diffrn_reflns_limit_h_max        12
_diffrn_reflns_limit_k_min        -19
_diffrn_reflns_limit_k_max        19
_diffrn_reflns_limit_l_min        -24
_diffrn_reflns_limit_l_max        24
_diffrn_reflns_theta_min          1.50
_diffrn_reflns_theta_max          26.34
_reflns_number_total              10990
_reflns_number_gt                 9615
_reflns_threshold_expression      >2sigma(I)
 
_computing_data_collection        'Bruker XSCANS' 
_computing_cell_refinement        'Bruker XSCANS' 
_computing_data_reduction         'Bruker SHELXTL' 
_computing_structure_solution     'SHELXS-97 (Sheldrick, 1990)' 
_computing_structure_refinement   'SHELXL-97 (Sheldrick, 1997)' 
_computing_molecular_graphics     'Bruker SHELXTL' 
_computing_publication_material   'Bruker SHELXTL'
 
_refine_special_details
;
 Refinement of F^2^ against ALL reflections.  The weighted R-factor wR and
 goodness of fit S are based on F^2^, conventional R-factors R are based
 on F, with F set to zero for negative F^2^. The threshold expression of
 F^2^ > 2sigma(F^2^) is used only for calculating R-factors(gt) etc. and is
 not relevant to the choice of reflections for refinement.  R-factors based
 on F^2^ are statistically about twice as large as those based on F, and R-
 factors based on ALL data will be even larger.
;
 
_refine_ls_structure_factor_coef  Fsqd
_refine_ls_matrix_type            full
_refine_ls_weighting_scheme       calc
_refine_ls_weighting_details
 'calc w=1/[\s^2^(Fo^2^)+(0.0643P)^2^+4.7043P] where P=(Fo^2^+2Fc^2^)/3'
_atom_sites_solution_primary      direct
_atom_sites_solution_secondary    difmap
_atom_sites_solution_hydrogens    geom
_refine_ls_hydrogen_treatment     constr
_refine_ls_extinction_method      none
_refine_ls_extinction_coef        ?
_refine_ls_number_reflns          10990
_refine_ls_number_parameters      441
_refine_ls_number_restraints      0
_refine_ls_R_factor_all           0.0684
_refine_ls_R_factor_gt            0.0586
_refine_ls_wR_factor_ref          0.1339
_refine_ls_wR_factor_gt           0.1300
_refine_ls_goodness_of_fit_ref    1.084
_refine_ls_restrained_S_all       1.084
_refine_ls_shift/su_max           0.001
_refine_ls_shift/su_mean          0.000
 
loop_
 _atom_site_label
 _atom_site_type_symbol
 _atom_site_fract_x
 _atom_site_fract_y
 _atom_site_fract_z
 _atom_site_U_iso_or_equiv
 _atom_site_adp_type
 _atom_site_occupancy
 _atom_site_symmetry_multiplicity
 _atom_site_calc_flag
 _atom_site_refinement_flags
 _atom_site_disorder_assembly
 _atom_site_disorder_group
Yb1 Yb 0.22777(2) 0.448295(18) 0.277114(14) 0.01883(9) Uani 1 1 d . . .
Si1 Si 0.28618(15) 0.23893(11) 0.23983(9) 0.0189(3) Uani 1 1 d . . .
Si2 Si 0.09380(15) 0.28970(11) 0.30234(9) 0.0197(3) Uani 1 1 d . . .
Si3 Si 0.47253(16) 0.10984(12) 0.31658(10) 0.0246(4) Uani 1 1 d . . .
Si4 Si 0.26918(16) 0.20553(12) 0.13201(9) 0.0229(3) Uani 1 1 d . . .
Si5 Si 0.04665(16) 0.15398(12) 0.39155(9) 0.0226(3) Uani 1 1 d . . .
Si6 Si -0.09587(16) 0.36720(12) 0.21610(9) 0.0232(4) Uani 1 1 d . . .
Si7 Si 0.09935(15) 0.69856(12) 0.23921(9) 0.0202(3) Uani 1 1 d . . .
Si8 Si 0.31423(15) 0.63152(12) 0.20224(9) 0.0191(3) Uani 1 1 d . . .
Si9 Si -0.06988(17) 0.83809(13) 0.15748(11) 0.0293(4) Uani 1 1 d . . .
Si10 Si 0.10432(17) 0.72206(13) 0.35326(10) 0.0278(4) Uani 1 1 d . . .
Si11 Si 0.46042(16) 0.71560(12) 0.20967(10) 0.0228(4) Uani 1 1 d . . .
Si12 Si 0.29191(17) 0.66835(14) 0.07371(10) 0.0269(4) Uani 1 1 d . . .
O1 O 0.3352(4) 0.3447(3) 0.2131(2) 0.0220(9) Uani 1 1 d . . .
O2 O 0.0482(4) 0.5937(3) 0.2656(2) 0.0245(9) Uani 1 1 d . . .
O3 O 0.3471(4) 0.3826(3) 0.3948(2) 0.0277(10) Uani 1 1 d . . .
C1 C 0.4424(6) 0.3554(5) 0.1640(4) 0.0325(15) Uani 1 1 d . . .
H1A H 0.5131 0.2916 0.1766 0.049 Uiso 1 1 calc R . .
H1B H 0.4806 0.4030 0.1695 0.049 Uiso 1 1 calc R . .
H1C H 0.4067 0.3791 0.1123 0.049 Uiso 1 1 calc R . .
C2 C -0.0858(6) 0.5958(5) 0.2907(4) 0.0328(15) Uani 1 1 d . . .
H2A H -0.1038 0.6235 0.3293 0.049 Uiso 1 1 calc R . .
H2B H -0.0912 0.5287 0.3113 0.049 Uiso 1 1 calc R . .
H2C H -0.1530 0.6366 0.2485 0.049 Uiso 1 1 calc R . .
C3 C 0.4489(7) -0.0126(5) 0.3392(4) 0.0407(17) Uani 1 1 d . . .
H3A H 0.5223 -0.0642 0.3747 0.061 Uiso 1 1 calc R . .
H3B H 0.4500 -0.0254 0.2934 0.061 Uiso 1 1 calc R . .
H3C H 0.3620 -0.0126 0.3613 0.061 Uiso 1 1 calc R . .
C4 C 0.6397(6) 0.1021(6) 0.2732(4) 0.0409(17) Uani 1 1 d . . .
H4A H 0.6633 0.1613 0.2662 0.061 Uiso 1 1 calc R . .
H4B H 0.6330 0.0973 0.2248 0.061 Uiso 1 1 calc R . .
H4C H 0.7097 0.0438 0.3061 0.061 Uiso 1 1 calc R . .
C5 C 0.4969(7) 0.1289(5) 0.4034(4) 0.0375(16) Uani 1 1 d . . .
H5A H 0.4190 0.1232 0.4335 0.056 Uiso 1 1 calc R . .
H5B H 0.5051 0.1945 0.3902 0.056 Uiso 1 1 calc R . .
H5C H 0.5793 0.0789 0.4320 0.056 Uiso 1 1 calc R . .
C6 C 0.1744(7) 0.1136(5) 0.1555(4) 0.0351(16) Uani 1 1 d . . .
H6A H 0.0883 0.1383 0.1754 0.053 Uiso 1 1 calc R . .
H6B H 0.2286 0.0507 0.1929 0.053 Uiso 1 1 calc R . .
H6C H 0.1570 0.1040 0.1103 0.053 Uiso 1 1 calc R . .
C7 C 0.4377(7) 0.1454(5) 0.1028(4) 0.0332(15) Uani 1 1 d . . .
H7A H 0.4237 0.1301 0.0598 0.050 Uiso 1 1 calc R . .
H7B H 0.4853 0.0845 0.1442 0.050 Uiso 1 1 calc R . .
H7C H 0.4917 0.1903 0.0890 0.050 Uiso 1 1 calc R . .
C8 C 0.1851(7) 0.3206(5) 0.0505(3) 0.0311(14) Uani 1 1 d . . .
H8A H 0.2318 0.3691 0.0433 0.047 Uiso 1 1 calc R . .
H8B H 0.0905 0.3476 0.0599 0.047 Uiso 1 1 calc R . .
H8C H 0.1888 0.3057 0.0056 0.047 Uiso 1 1 calc R . .
C9 C 0.0221(7) 0.0652(5) 0.3531(4) 0.0324(15) Uani 1 1 d . . .
H9A H 0.1044 0.0399 0.3305 0.049 Uiso 1 1 calc R . .
H9B H -0.0539 0.0991 0.3152 0.049 Uiso 1 1 calc R . .
H9C H 0.0028 0.0103 0.3936 0.049 Uiso 1 1 calc R . .
C10 C -0.1139(7) 0.1967(5) 0.4357(4) 0.0367(16) Uani 1 1 d . . .
H10A H -0.1209 0.1426 0.4814 0.055 Uiso 1 1 calc R . .
H10B H -0.1917 0.2174 0.4008 0.055 Uiso 1 1 calc R . .
H10C H -0.1125 0.2524 0.4478 0.055 Uiso 1 1 calc R . .
C11 C 0.1788(7) 0.0806(5) 0.4707(4) 0.0341(15) Uani 1 1 d . . .
H11A H 0.1467 0.0308 0.5094 0.051 Uiso 1 1 calc R . .
H11B H 0.1967 0.1244 0.4916 0.051 Uiso 1 1 calc R . .
H11C H 0.2621 0.0479 0.4525 0.051 Uiso 1 1 calc R . .
C12 C -0.0773(7) 0.4834(5) 0.1423(4) 0.0343(15) Uani 1 1 d . . .
H12A H 0.0081 0.4677 0.1190 0.051 Uiso 1 1 calc R . .
H12B H -0.0776 0.5299 0.1653 0.051 Uiso 1 1 calc R . .
H12C H -0.1528 0.5131 0.1044 0.051 Uiso 1 1 calc R . .
C13 C -0.2515(6) 0.4046(5) 0.2657(4) 0.0337(15) Uani 1 1 d . . .
H13A H -0.3241 0.4551 0.2290 0.051 Uiso 1 1 calc R . .
H13B H -0.2308 0.4312 0.3006 0.051 Uiso 1 1 calc R . .
H13C H -0.2805 0.3471 0.2933 0.051 Uiso 1 1 calc R . .
C14 C -0.1461(6) 0.2998(5) 0.1650(4) 0.0322(15) Uani 1 1 d . . .
H14A H -0.2312 0.3415 0.1350 0.048 Uiso 1 1 calc R . .
H14B H -0.1580 0.2387 0.2011 0.048 Uiso 1 1 calc R . .
H14C H -0.0752 0.2842 0.1322 0.048 Uiso 1 1 calc R . .
C15 C -0.0001(8) 0.9428(5) 0.1310(5) 0.058(2) Uani 1 1 d . . .
H15A H 0.0896 0.9245 0.1124 0.087 Uiso 1 1 calc R . .
H15B H 0.0071 0.9582 0.1748 0.087 Uiso 1 1 calc R . .
H15C H -0.0604 1.0006 0.0919 0.087 Uiso 1 1 calc R . .
C16 C -0.2333(7) 0.8752(5) 0.2017(4) 0.0434(18) Uani 1 1 d . . .
H16A H -0.2157 0.8911 0.2438 0.065 Uiso 1 1 calc R . .
H16B H -0.2713 0.8207 0.2197 0.065 Uiso 1 1 calc R . .
H16C H -0.2977 0.9331 0.1647 0.065 Uiso 1 1 calc R . .
C17 C -0.1186(7) 0.8251(7) 0.0716(4) 0.047(2) Uani 1 1 d . . .
H17A H -0.1890 0.8854 0.0412 0.071 Uiso 1 1 calc R . .
H17B H -0.1531 0.7690 0.0859 0.071 Uiso 1 1 calc R . .
H17C H -0.0393 0.8142 0.0426 0.071 Uiso 1 1 calc R . .
C18 C 0.1943(9) 0.6000(6) 0.4265(4) 0.052(2) Uani 1 1 d . . .
H18A H 0.2861 0.5751 0.4123 0.078 Uiso 1 1 calc R . .
H18B H 0.1453 0.5535 0.4315 0.078 Uiso 1 1 calc R . .
H18C H 0.1990 0.6071 0.4742 0.078 Uiso 1 1 calc R . .
C19 C 0.1911(8) 0.8126(6) 0.3498(5) 0.0450(19) Uani 1 1 d . . .
H19A H 0.1885 0.8187 0.3983 0.067 Uiso 1 1 calc R . .
H19B H 0.1449 0.8768 0.3111 0.067 Uiso 1 1 calc R . .
H19C H 0.2854 0.7895 0.3383 0.067 Uiso 1 1 calc R . .
C20 C -0.0661(8) 0.7667(8) 0.3875(5) 0.061(3) Uani 1 1 d . . .
H20A H -0.0549 0.7650 0.4377 0.092 Uiso 1 1 calc R . .
H20B H -0.1193 0.7240 0.3888 0.092 Uiso 1 1 calc R . .
H20C H -0.1132 0.8344 0.3537 0.092 Uiso 1 1 calc R . .
C21 C 0.3819(7) 0.8530(5) 0.1814(4) 0.0376(17) Uani 1 1 d . . .
H21A H 0.4486 0.8805 0.1908 0.056 Uiso 1 1 calc R . .
H21B H 0.3036 0.8665 0.2105 0.056 Uiso 1 1 calc R . .
H21C H 0.3528 0.8833 0.1282 0.056 Uiso 1 1 calc R . .
C22 C 0.5996(6) 0.7009(5) 0.1450(4) 0.0300(14) Uani 1 1 d . . .
H22A H 0.5607 0.7305 0.0935 0.045 Uiso 1 1 calc R . .
H22B H 0.6478 0.6307 0.1579 0.045 Uiso 1 1 calc R . .
H22C H 0.6627 0.7339 0.1500 0.045 Uiso 1 1 calc R . .
C23 C 0.5452(7) 0.6629(5) 0.3066(4) 0.0350(16) Uani 1 1 d . . .
H23A H 0.6020 0.5946 0.3182 0.053 Uiso 1 1 calc R . .
H23B H 0.4761 0.6646 0.3429 0.053 Uiso 1 1 calc R . .
H23C H 0.6013 0.7020 0.3089 0.053 Uiso 1 1 calc R . .
C24 C 0.4565(7) 0.6073(5) 0.0400(4) 0.0370(17) Uani 1 1 d . . .
H24A H 0.4372 0.5950 -0.0036 0.055 Uiso 1 1 calc R . .
H24B H 0.5045 0.5447 0.0799 0.055 Uiso 1 1 calc R . .
H24C H 0.5129 0.6506 0.0262 0.055 Uiso 1 1 calc R . .
C25 C 0.1663(8) 0.6113(6) 0.0574(4) 0.0448(19) Uani 1 1 d . . .
H25A H 0.0775 0.6416 0.0722 0.067 Uiso 1 1 calc R . .
H25B H 0.1968 0.5404 0.0872 0.067 Uiso 1 1 calc R . .
H25C H 0.1597 0.6224 0.0044 0.067 Uiso 1 1 calc R . .
C26 C 0.2451(7) 0.8006(5) 0.0088(4) 0.0414(18) Uani 1 1 d . . .
H26A H 0.3158 0.8278 0.0131 0.062 Uiso 1 1 calc R . .
H26B H 0.1591 0.8377 0.0219 0.062 Uiso 1 1 calc R . .
H26C H 0.2357 0.8055 -0.0426 0.062 Uiso 1 1 calc R . .
C27 C 0.4814(6) 0.3881(6) 0.4060(4) 0.0368(16) Uani 1 1 d . . .
H27A H 0.4839 0.4563 0.3797 0.044 Uiso 1 1 calc R . .
H27B H 0.5510 0.3440 0.3870 0.044 Uiso 1 1 calc R . .
C28 C 0.5054(9) 0.3565(7) 0.4877(5) 0.059(2) Uani 1 1 d . . .
H28A H 0.4705 0.4130 0.5034 0.070 Uiso 1 1 calc R . .
H28B H 0.6029 0.3244 0.5034 0.070 Uiso 1 1 calc R . .
C29 C 0.4287(11) 0.2853(7) 0.5190(5) 0.066(3) Uani 1 1 d . . .
H29A H 0.4034 0.2800 0.5700 0.080 Uiso 1 1 calc R . .
H29B H 0.4828 0.2192 0.5207 0.080 Uiso 1 1 calc R . .
C30 C 0.3043(7) 0.3278(5) 0.4659(4) 0.0367(16) Uani 1 1 d . . .
H30A H 0.2744 0.2747 0.4626 0.044 Uiso 1 1 calc R . .
H30B H 0.2292 0.3716 0.4824 0.044 Uiso 1 1 calc R . .
 
loop_
 _atom_site_aniso_label
 _atom_site_aniso_U_11
 _atom_site_aniso_U_22
 _atom_site_aniso_U_33
 _atom_site_aniso_U_23
 _atom_site_aniso_U_13
 _atom_site_aniso_U_12
Yb1 0.01545(13) 0.01611(13) 0.02818(15) -0.00908(10) 0.00248(9) -0.00867(10)
Si1 0.0144(7) 0.0163(8) 0.0289(9) -0.0091(7) 0.0022(6) -0.0082(6)
Si2 0.0129(7) 0.0171(8) 0.0320(9) -0.0096(7) 0.0041(6) -0.0086(6)
Si3 0.0158(8) 0.0201(8) 0.0368(10) -0.0100(7) -0.0003(7) -0.0050(7)
Si4 0.0209(8) 0.0230(9) 0.0293(9) -0.0120(7) 0.0051(6) -0.0110(7)
Si5 0.0187(8) 0.0207(8) 0.0293(9) -0.0074(7) 0.0058(6) -0.0111(7)
Si6 0.0136(8) 0.0223(8) 0.0324(9) -0.0067(7) 0.0033(6) -0.0089(7)
Si7 0.0131(7) 0.0177(8) 0.0336(9) -0.0117(7) 0.0023(6) -0.0076(6)
Si8 0.0179(8) 0.0198(8) 0.0227(8) -0.0077(7) 0.0051(6) -0.0112(7)
Si9 0.0159(8) 0.0221(9) 0.0483(11) -0.0102(8) -0.0035(7) -0.0069(7)
Si10 0.0211(9) 0.0298(9) 0.0384(10) -0.0191(8) 0.0058(7) -0.0090(7)
Si11 0.0146(8) 0.0235(9) 0.0366(10) -0.0145(8) 0.0029(6) -0.0107(7)
Si12 0.0246(9) 0.0347(10) 0.0277(9) -0.0113(8) 0.0051(7) -0.0189(8)
O1 0.015(2) 0.023(2) 0.031(2) -0.0107(18) 0.0080(16) -0.0113(17)
O2 0.013(2) 0.023(2) 0.040(2) -0.0105(19) 0.0049(17) -0.0101(17)
O3 0.027(2) 0.033(2) 0.026(2) -0.010(2) 0.0041(17) -0.017(2)
C1 0.027(3) 0.030(4) 0.052(4) -0.021(3) 0.019(3) -0.020(3)
C2 0.016(3) 0.033(4) 0.055(4) -0.019(3) 0.012(3) -0.014(3)
C3 0.032(4) 0.027(4) 0.061(5) -0.017(4) 0.003(3) -0.008(3)
C4 0.020(3) 0.042(4) 0.058(5) -0.018(4) 0.000(3) -0.005(3)
C5 0.028(4) 0.042(4) 0.045(4) -0.020(4) -0.004(3) -0.010(3)
C6 0.045(4) 0.031(4) 0.040(4) -0.016(3) 0.005(3) -0.024(3)
C7 0.034(4) 0.031(4) 0.039(4) -0.018(3) 0.012(3) -0.012(3)
C8 0.033(4) 0.032(4) 0.031(3) -0.011(3) 0.002(3) -0.014(3)
C9 0.038(4) 0.026(3) 0.041(4) -0.014(3) 0.011(3) -0.019(3)
C10 0.033(4) 0.035(4) 0.039(4) -0.011(3) 0.013(3) -0.013(3)
C11 0.029(4) 0.034(4) 0.035(4) -0.006(3) 0.003(3) -0.013(3)
C12 0.030(4) 0.025(3) 0.041(4) -0.005(3) 0.006(3) -0.009(3)
C13 0.021(3) 0.031(4) 0.039(4) -0.007(3) 0.006(3) -0.005(3)
C14 0.020(3) 0.039(4) 0.042(4) -0.017(3) 0.002(3) -0.013(3)
C15 0.034(4) 0.026(4) 0.095(7) -0.003(4) -0.019(4) -0.006(3)
C16 0.031(4) 0.038(4) 0.065(5) -0.027(4) -0.006(3) -0.005(3)
C17 0.024(4) 0.072(6) 0.047(4) -0.023(4) 0.001(3) -0.017(4)
C18 0.079(6) 0.038(4) 0.038(4) -0.018(4) -0.006(4) -0.009(4)
C19 0.044(4) 0.044(4) 0.069(5) -0.037(4) 0.017(4) -0.026(4)
C20 0.036(4) 0.111(8) 0.059(5) -0.054(6) 0.017(4) -0.027(5)
C21 0.026(4) 0.030(4) 0.064(5) -0.021(4) 0.008(3) -0.016(3)
C22 0.016(3) 0.038(4) 0.043(4) -0.020(3) 0.008(3) -0.015(3)
C23 0.027(3) 0.047(4) 0.043(4) -0.025(4) 0.000(3) -0.017(3)
C24 0.048(4) 0.039(4) 0.040(4) -0.022(3) 0.020(3) -0.029(4)
C25 0.043(4) 0.073(6) 0.041(4) -0.027(4) 0.009(3) -0.042(4)
C26 0.026(4) 0.042(4) 0.042(4) 0.000(3) 0.003(3) -0.011(3)
C27 0.021(3) 0.052(4) 0.043(4) -0.020(4) -0.006(3) -0.014(3)
C28 0.044(5) 0.076(6) 0.058(5) -0.028(5) -0.011(4) -0.017(5)
C29 0.118(9) 0.048(5) 0.037(5) -0.003(4) -0.013(5) -0.045(6)
C30 0.047(4) 0.034(4) 0.032(4) -0.012(3) 0.014(3) -0.019(3)
 
_geom_special_details
;
 All esds (except the esd in the dihedral angle between two l.s. planes)
 are estimated using the full covariance matrix.  The cell esds are taken
 into account individually in the estimation of esds in distances, angles
 and torsion angles; correlations between esds in cell parameters are only
 used when they are defined by crystal symmetry.  An approximate (isotropic)
 treatment of cell esds is used for estimating esds involving l.s. planes.
;
 
loop_
 _geom_bond_atom_site_label_1
 _geom_bond_atom_site_label_2
 _geom_bond_distance
 _geom_bond_site_symmetry_2
 _geom_bond_publ_flag
Yb1 O3 2.364(4) . ?
Yb1 O1 2.365(4) . ?
Yb1 O2 2.377(4) . ?
Yb1 Si8 3.0469(17) . ?
Yb1 Si2 3.0627(17) . ?
Yb1 Si1 3.4478(19) . ?
Yb1 Si7 3.468(2) . ?
Si1 O1 1.750(4) . ?
Si1 Si2 2.361(2) . ?
Si1 Si4 2.369(2) . ?
Si1 Si3 2.374(2) . ?
Si2 Si5 2.331(2) . ?
Si2 Si6 2.354(2) . ?
Si3 C5 1.863(7) . ?
Si3 C3 1.869(7) . ?
Si3 C4 1.882(7) . ?
Si4 C8 1.867(7) . ?
Si4 C7 1.882(6) . ?
Si4 C6 1.883(6) . ?
Si5 C11 1.869(7) . ?
Si5 C9 1.880(6) . ?
Si5 C10 1.884(7) . ?
Si6 C14 1.882(7) . ?
Si6 C12 1.884(6) . ?
Si6 C13 1.885(6) . ?
Si7 O2 1.749(4) . ?
Si7 Si8 2.354(2) . ?
Si7 Si9 2.374(2) . ?
Si7 Si10 2.384(2) . ?
Si8 Si11 2.337(2) . ?
Si8 Si12 2.349(2) . ?
Si9 C15 1.866(8) . ?
Si9 C17 1.872(7) . ?
Si9 C16 1.889(7) . ?
Si10 C18 1.864(8) . ?
Si10 C19 1.873(7) . ?
Si10 C20 1.878(8) . ?
Si11 C22 1.880(6) . ?
Si11 C21 1.888(7) . ?
Si11 C23 1.889(7) . ?
Si12 C26 1.870(7) . ?
Si12 C25 1.895(7) . ?
Si12 C24 1.896(7) . ?
O1 C1 1.436(7) . ?
O2 C2 1.449(7) . ?
O3 C30 1.449(7) . ?
O3 C27 1.465(7) . ?
C27 C28 1.483(10) . ?
C28 C29 1.487(12) . ?
C29 C30 1.514(11) . ?
 
loop_
 _geom_angle_atom_site_label_1
 _geom_angle_atom_site_label_2
 _geom_angle_atom_site_label_3
 _geom_angle
 _geom_angle_site_symmetry_1
 _geom_angle_site_symmetry_3
 _geom_angle_publ_flag
O3 Yb1 O1 107.19(14) . . ?
O3 Yb1 O2 109.57(15) . . ?
O1 Yb1 O2 143.23(14) . . ?
O3 Yb1 Si8 99.73(10) . . ?
O1 Yb1 Si8 104.42(10) . . ?
O2 Yb1 Si8 68.59(10) . . ?
O3 Yb1 Si2 98.90(10) . . ?
O1 Yb1 Si2 69.05(9) . . ?
O2 Yb1 Si2 105.62(10) . . ?
Si8 Yb1 Si2 161.35(5) . . ?
O3 Yb1 Si1 101.14(11) . . ?
O1 Yb1 Si1 27.85(9) . . ?
O2 Yb1 Si1 139.25(10) . . ?
Si8 Yb1 Si1 132.05(4) . . ?
Si2 Yb1 Si1 42.01(4) . . ?
O3 Yb1 Si7 103.62(11) . . ?
O1 Yb1 Si7 137.95(10) . . ?
O2 Yb1 Si7 27.55(9) . . ?
Si8 Yb1 Si7 41.75(4) . . ?
Si2 Yb1 Si7 132.86(4) . . ?
Si1 Yb1 Si7 155.22(4) . . ?
O1 Si1 Si2 98.05(15) . . ?
O1 Si1 Si4 108.09(15) . . ?
Si2 Si1 Si4 121.71(8) . . ?
O1 Si1 Si3 104.77(15) . . ?
Si2 Si1 Si3 115.84(9) . . ?
Si4 Si1 Si3 106.51(9) . . ?
O1 Si1 Yb1 39.17(13) . . ?
Si2 Si1 Yb1 60.24(5) . . ?
Si4 Si1 Yb1 135.47(7) . . ?
Si3 Si1 Yb1 110.75(7) . . ?
Si5 Si2 Si6 104.25(8) . . ?
Si5 Si2 Si1 110.78(8) . . ?
Si6 Si2 Si1 108.38(9) . . ?
Si5 Si2 Yb1 144.69(8) . . ?
Si6 Si2 Yb1 105.09(7) . . ?
Si1 Si2 Yb1 77.75(6) . . ?
C5 Si3 C3 110.8(3) . . ?
C5 Si3 C4 104.4(3) . . ?
C3 Si3 C4 105.8(3) . . ?
C5 Si3 Si1 110.4(2) . . ?
C3 Si3 Si1 110.8(2) . . ?
C4 Si3 Si1 114.4(2) . . ?
C8 Si4 C7 106.9(3) . . ?
C8 Si4 C6 111.9(3) . . ?
C7 Si4 C6 105.5(3) . . ?
C8 Si4 Si1 111.4(2) . . ?
C7 Si4 Si1 113.3(2) . . ?
C6 Si4 Si1 107.7(2) . . ?
C11 Si5 C9 106.7(3) . . ?
C11 Si5 C10 105.3(3) . . ?
C9 Si5 C10 106.8(3) . . ?
C11 Si5 Si2 113.8(2) . . ?
C9 Si5 Si2 114.0(2) . . ?
C10 Si5 Si2 109.7(2) . . ?
C14 Si6 C12 106.2(3) . . ?
C14 Si6 C13 103.2(3) . . ?
C12 Si6 C13 107.1(3) . . ?
C14 Si6 Si2 121.0(2) . . ?
C12 Si6 Si2 109.4(2) . . ?
C13 Si6 Si2 109.0(2) . . ?
O2 Si7 Si8 97.27(15) . . ?
O2 Si7 Si9 110.27(15) . . ?
Si8 Si7 Si9 123.30(9) . . ?
O2 Si7 Si10 102.93(16) . . ?
Si8 Si7 Si10 114.13(8) . . ?
Si9 Si7 Si10 106.71(9) . . ?
O2 Si7 Yb1 38.93(13) . . ?
Si8 Si7 Yb1 59.51(5) . . ?
Si9 Si7 Yb1 137.85(7) . . ?
Si10 Si7 Yb1 108.35(7) . . ?
Si11 Si8 Si12 102.95(8) . . ?
Si11 Si8 Si7 110.58(9) . . ?
Si12 Si8 Si7 107.52(9) . . ?
Si11 Si8 Yb1 145.92(8) . . ?
Si12 Si8 Yb1 105.13(7) . . ?
Si7 Si8 Yb1 78.74(6) . . ?
C15 Si9 C17 109.9(4) . . ?
C15 Si9 C16 106.2(4) . . ?
C17 Si9 C16 105.6(3) . . ?
C15 Si9 Si7 105.8(2) . . ?
C17 Si9 Si7 114.7(3) . . ?
C16 Si9 Si7 114.3(3) . . ?
C18 Si10 C19 109.0(4) . . ?
C18 Si10 C20 106.4(4) . . ?
C19 Si10 C20 104.8(4) . . ?
C18 Si10 Si7 107.3(2) . . ?
C19 Si10 Si7 114.1(3) . . ?
C20 Si10 Si7 114.9(3) . . ?
C22 Si11 C21 104.9(3) . . ?
C22 Si11 C23 106.4(3) . . ?
C21 Si11 C23 108.3(3) . . ?
C22 Si11 Si8 109.8(2) . . ?
C21 Si11 Si8 115.6(2) . . ?
C23 Si11 Si8 111.2(2) . . ?
C26 Si12 C25 109.6(4) . . ?
C26 Si12 C24 104.1(3) . . ?
C25 Si12 C24 105.3(3) . . ?
C26 Si12 Si8 118.0(3) . . ?
C25 Si12 Si8 108.2(2) . . ?
C24 Si12 Si8 110.9(2) . . ?
C1 O1 Si1 119.9(4) . . ?
C1 O1 Yb1 126.7(3) . . ?
Si1 O1 Yb1 112.98(18) . . ?
C2 O2 Si7 120.9(4) . . ?
C2 O2 Yb1 124.7(3) . . ?
Si7 O2 Yb1 113.52(18) . . ?
C30 O3 C27 109.3(5) . . ?
C30 O3 Yb1 126.6(4) . . ?
C27 O3 Yb1 124.1(4) . . ?
O3 C27 C28 105.8(6) . . ?
C27 C28 C29 103.0(6) . . ?
C28 C29 C30 104.4(6) . . ?
O3 C30 C29 104.4(6) . . ?
 
loop_
 _geom_torsion_atom_site_label_1
 _geom_torsion_atom_site_label_2
 _geom_torsion_atom_site_label_3
 _geom_torsion_atom_site_label_4
 _geom_torsion
 _geom_torsion_site_symmetry_1
 _geom_torsion_site_symmetry_2
 _geom_torsion_site_symmetry_3
 _geom_torsion_site_symmetry_4
 _geom_torsion_publ_flag
O3 Yb1 Si1 O1 -105.8(2) . . . . ?
O2 Yb1 Si1 O1 115.5(3) . . . . ?
Si8 Yb1 Si1 O1 8.4(2) . . . . ?
Si2 Yb1 Si1 O1 163.2(2) . . . . ?
Si7 Yb1 Si1 O1 72.1(2) . . . . ?
O3 Yb1 Si1 Si2 90.98(11) . . . . ?
O1 Yb1 Si1 Si2 -163.2(2) . . . . ?
O2 Yb1 Si1 Si2 -47.75(17) . . . . ?
Si8 Yb1 Si1 Si2 -154.84(6) . . . . ?
Si7 Yb1 Si1 Si2 -91.14(10) . . . . ?
O3 Yb1 Si1 Si4 -162.64(13) . . . . ?
O1 Yb1 Si1 Si4 -56.9(2) . . . . ?
O2 Yb1 Si1 Si4 58.63(18) . . . . ?
Si8 Yb1 Si1 Si4 -48.46(12) . . . . ?
Si2 Yb1 Si1 Si4 106.38(11) . . . . ?
Si7 Yb1 Si1 Si4 15.24(15) . . . . ?
O3 Yb1 Si1 Si3 -17.71(12) . . . . ?
O1 Yb1 Si1 Si3 88.1(2) . . . . ?
O2 Yb1 Si1 Si3 -156.44(16) . . . . ?
Si8 Yb1 Si1 Si3 96.47(8) . . . . ?
Si2 Yb1 Si1 Si3 -108.69(9) . . . . ?
Si7 Yb1 Si1 Si3 160.17(8) . . . . ?
O1 Si1 Si2 Si5 -154.77(15) . . . . ?
Si4 Si1 Si2 Si5 88.10(11) . . . . ?
Si3 Si1 Si2 Si5 -44.00(11) . . . . ?
Yb1 Si1 Si2 Si5 -144.17(9) . . . . ?
O1 Si1 Si2 Si6 91.43(16) . . . . ?
Si4 Si1 Si2 Si6 -25.70(12) . . . . ?
Si3 Si1 Si2 Si6 -157.80(8) . . . . ?
Yb1 Si1 Si2 Si6 102.04(8) . . . . ?
O1 Si1 Si2 Yb1 -10.60(14) . . . . ?
Si4 Si1 Si2 Yb1 -127.73(9) . . . . ?
Si3 Si1 Si2 Yb1 100.16(8) . . . . ?
O3 Yb1 Si2 Si5 11.97(17) . . . . ?
O1 Yb1 Si2 Si5 117.06(17) . . . . ?
O2 Yb1 Si2 Si5 -101.35(16) . . . . ?
Si8 Yb1 Si2 Si5 -170.43(12) . . . . ?
Si1 Yb1 Si2 Si5 108.76(15) . . . . ?
Si7 Yb1 Si2 Si5 -106.10(13) . . . . ?
O3 Yb1 Si2 Si6 157.21(12) . . . . ?
O1 Yb1 Si2 Si6 -97.71(13) . . . . ?
O2 Yb1 Si2 Si6 43.89(13) . . . . ?
Si8 Yb1 Si2 Si6 -25.19(17) . . . . ?
Si1 Yb1 Si2 Si6 -106.00(9) . . . . ?
Si7 Yb1 Si2 Si6 39.13(9) . . . . ?
O3 Yb1 Si2 Si1 -96.79(12) . . . . ?
O1 Yb1 Si2 Si1 8.30(11) . . . . ?
O2 Yb1 Si2 Si1 149.89(12) . . . . ?
Si8 Yb1 Si2 Si1 80.81(14) . . . . ?
Si7 Yb1 Si2 Si1 145.14(6) . . . . ?
O1 Si1 Si3 C5 65.1(3) . . . . ?
Si2 Si1 Si3 C5 -41.6(3) . . . . ?
Si4 Si1 Si3 C5 179.5(2) . . . . ?
Yb1 Si1 Si3 C5 24.4(3) . . . . ?
O1 Si1 Si3 C3 -171.6(3) . . . . ?
Si2 Si1 Si3 C3 81.6(3) . . . . ?
Si4 Si1 Si3 C3 -57.2(3) . . . . ?
Yb1 Si1 Si3 C3 147.6(3) . . . . ?
O1 Si1 Si3 C4 -52.2(3) . . . . ?
Si2 Si1 Si3 C4 -159.0(3) . . . . ?
Si4 Si1 Si3 C4 62.2(3) . . . . ?
Yb1 Si1 Si3 C4 -92.9(3) . . . . ?
O1 Si1 Si4 C8 -42.5(3) . . . . ?
Si2 Si1 Si4 C8 69.5(2) . . . . ?
Si3 Si1 Si4 C8 -154.6(2) . . . . ?
Yb1 Si1 Si4 C8 -8.7(3) . . . . ?
O1 Si1 Si4 C7 78.1(3) . . . . ?
Si2 Si1 Si4 C7 -169.9(2) . . . . ?
Si3 Si1 Si4 C7 -34.0(2) . . . . ?
Yb1 Si1 Si4 C7 111.9(2) . . . . ?
O1 Si1 Si4 C6 -165.5(3) . . . . ?
Si2 Si1 Si4 C6 -53.5(3) . . . . ?
Si3 Si1 Si4 C6 82.3(3) . . . . ?
Yb1 Si1 Si4 C6 -131.7(3) . . . . ?
Si6 Si2 Si5 C11 -177.4(3) . . . . ?
Si1 Si2 Si5 C11 66.2(3) . . . . ?
Yb1 Si2 Si5 C11 -32.0(3) . . . . ?
Si6 Si2 Si5 C9 60.0(3) . . . . ?
Si1 Si2 Si5 C9 -56.4(3) . . . . ?
Yb1 Si2 Si5 C9 -154.7(3) . . . . ?
Si6 Si2 Si5 C10 -59.8(3) . . . . ?
Si1 Si2 Si5 C10 -176.1(3) . . . . ?
Yb1 Si2 Si5 C10 85.6(3) . . . . ?
Si5 Si2 Si6 C14 -59.1(3) . . . . ?
Si1 Si2 Si6 C14 58.9(3) . . . . ?
Yb1 Si2 Si6 C14 140.8(2) . . . . ?
Si5 Si2 Si6 C12 177.0(2) . . . . ?
Si1 Si2 Si6 C12 -65.0(2) . . . . ?
Yb1 Si2 Si6 C12 16.8(2) . . . . ?
Si5 Si2 Si6 C13 60.1(2) . . . . ?
Si1 Si2 Si6 C13 178.2(2) . . . . ?
Yb1 Si2 Si6 C13 -100.0(2) . . . . ?
O3 Yb1 Si7 O2 -106.3(2) . . . . ?
O1 Yb1 Si7 O2 117.4(3) . . . . ?
Si8 Yb1 Si7 O2 164.3(2) . . . . ?
Si2 Yb1 Si7 O2 9.9(2) . . . . ?
Si1 Yb1 Si7 O2 75.8(2) . . . . ?
O3 Yb1 Si7 Si8 89.40(11) . . . . ?
O1 Yb1 Si7 Si8 -46.87(15) . . . . ?
O2 Yb1 Si7 Si8 -164.3(2) . . . . ?
Si2 Yb1 Si7 Si8 -154.36(7) . . . . ?
Si1 Yb1 Si7 Si8 -88.45(10) . . . . ?
O3 Yb1 Si7 Si9 -163.20(14) . . . . ?
O1 Yb1 Si7 Si9 60.54(18) . . . . ?
O2 Yb1 Si7 Si9 -56.9(2) . . . . ?
Si8 Yb1 Si7 Si9 107.40(13) . . . . ?
Si2 Yb1 Si7 Si9 -46.96(13) . . . . ?
Si1 Yb1 Si7 Si9 18.95(17) . . . . ?
O3 Yb1 Si7 Si10 -18.33(12) . . . . ?
O1 Yb1 Si7 Si10 -154.60(14) . . . . ?
O2 Yb1 Si7 Si10 88.0(2) . . . . ?
Si8 Yb1 Si7 Si10 -107.73(9) . . . . ?
Si2 Yb1 Si7 Si10 97.91(8) . . . . ?
Si1 Yb1 Si7 Si10 163.82(8) . . . . ?
O2 Si7 Si8 Si11 -155.70(16) . . . . ?
Si9 Si7 Si8 Si11 84.19(12) . . . . ?
Si10 Si7 Si8 Si11 -47.97(12) . . . . ?
Yb1 Si7 Si8 Si11 -145.82(9) . . . . ?
O2 Si7 Si8 Si12 92.62(16) . . . . ?
Si9 Si7 Si8 Si12 -27.49(12) . . . . ?
Si10 Si7 Si8 Si12 -159.66(9) . . . . ?
Yb1 Si7 Si8 Si12 102.49(8) . . . . ?
O2 Si7 Si8 Yb1 -9.88(15) . . . . ?
Si9 Si7 Si8 Yb1 -129.98(9) . . . . ?
Si10 Si7 Si8 Yb1 97.85(8) . . . . ?
O3 Yb1 Si8 Si11 10.60(17) . . . . ?
O1 Yb1 Si8 Si11 -100.11(17) . . . . ?
O2 Yb1 Si8 Si11 117.93(18) . . . . ?
Si2 Yb1 Si8 Si11 -166.99(12) . . . . ?
Si1 Yb1 Si8 Si11 -104.14(14) . . . . ?
Si7 Yb1 Si8 Si11 110.20(15) . . . . ?
O3 Yb1 Si8 Si12 155.09(12) . . . . ?
O1 Yb1 Si8 Si12 44.38(12) . . . . ?
O2 Yb1 Si8 Si12 -97.58(13) . . . . ?
Si2 Yb1 Si8 Si12 -22.51(17) . . . . ?
Si1 Yb1 Si8 Si12 40.34(9) . . . . ?
Si7 Yb1 Si8 Si12 -105.31(9) . . . . ?
O3 Yb1 Si8 Si7 -99.60(12) . . . . ?
O1 Yb1 Si8 Si7 149.69(11) . . . . ?
O2 Yb1 Si8 Si7 7.73(12) . . . . ?
Si2 Yb1 Si8 Si7 82.80(14) . . . . ?
Si1 Yb1 Si8 Si7 145.65(6) . . . . ?
O2 Si7 Si9 C15 -177.9(4) . . . . ?
Si8 Si7 Si9 C15 -64.1(4) . . . . ?
Si10 Si7 Si9 C15 71.0(3) . . . . ?
Yb1 Si7 Si9 C15 -143.8(3) . . . . ?
O2 Si7 Si9 C17 -56.6(3) . . . . ?
Si8 Si7 Si9 C17 57.2(3) . . . . ?
Si10 Si7 Si9 C17 -167.7(3) . . . . ?
Yb1 Si7 Si9 C17 -22.5(3) . . . . ?
O2 Si7 Si9 C16 65.6(3) . . . . ?
Si8 Si7 Si9 C16 179.4(3) . . . . ?
Si10 Si7 Si9 C16 -45.5(3) . . . . ?
Yb1 Si7 Si9 C16 99.7(3) . . . . ?
O2 Si7 Si10 C18 46.6(3) . . . . ?
Si8 Si7 Si10 C18 -57.6(3) . . . . ?
Si9 Si7 Si10 C18 162.7(3) . . . . ?
Yb1 Si7 Si10 C18 6.5(3) . . . . ?
O2 Si7 Si10 C19 167.4(3) . . . . ?
Si8 Si7 Si10 C19 63.2(3) . . . . ?
Si9 Si7 Si10 C19 -76.5(3) . . . . ?
Yb1 Si7 Si10 C19 127.3(3) . . . . ?
O2 Si7 Si10 C20 -71.5(4) . . . . ?
Si8 Si7 Si10 C20 -175.7(4) . . . . ?
Si9 Si7 Si10 C20 44.6(4) . . . . ?
Yb1 Si7 Si10 C20 -111.6(4) . . . . ?
Si12 Si8 Si11 C22 -41.6(2) . . . . ?
Si7 Si8 Si11 C22 -156.2(2) . . . . ?
Yb1 Si8 Si11 C22 103.2(3) . . . . ?
Si12 Si8 Si11 C21 76.8(3) . . . . ?
Si7 Si8 Si11 C21 -37.8(3) . . . . ?
Yb1 Si8 Si11 C21 -138.4(3) . . . . ?
Si12 Si8 Si11 C23 -159.2(2) . . . . ?
Si7 Si8 Si11 C23 86.2(3) . . . . ?
Yb1 Si8 Si11 C23 -14.3(3) . . . . ?
Si11 Si8 Si12 C26 -51.4(3) . . . . ?
Si7 Si8 Si12 C26 65.4(3) . . . . ?
Yb1 Si8 Si12 C26 148.1(2) . . . . ?
Si11 Si8 Si12 C25 -176.5(3) . . . . ?
Si7 Si8 Si12 C25 -59.8(3) . . . . ?
Yb1 Si8 Si12 C25 23.0(3) . . . . ?
Si11 Si8 Si12 C24 68.5(2) . . . . ?
Si7 Si8 Si12 C24 -174.7(2) . . . . ?
Yb1 Si8 Si12 C24 -92.0(2) . . . . ?
Si2 Si1 O1 C1 -172.4(4) . . . . ?
Si4 Si1 O1 C1 -45.2(5) . . . . ?
Si3 Si1 O1 C1 68.1(4) . . . . ?
Yb1 Si1 O1 C1 173.0(5) . . . . ?
Si2 Si1 O1 Yb1 14.65(19) . . . . ?
Si4 Si1 O1 Yb1 141.85(14) . . . . ?
Si3 Si1 O1 Yb1 -104.86(17) . . . . ?
O3 Yb1 O1 C1 -91.2(5) . . . . ?
O2 Yb1 O1 C1 87.4(5) . . . . ?
Si8 Yb1 O1 C1 14.0(5) . . . . ?
Si2 Yb1 O1 C1 175.7(5) . . . . ?
Si1 Yb1 O1 C1 -172.4(6) . . . . ?
Si7 Yb1 O1 C1 44.1(5) . . . . ?
O3 Yb1 O1 Si1 81.2(2) . . . . ?
O2 Yb1 O1 Si1 -100.2(3) . . . . ?
Si8 Yb1 O1 Si1 -173.57(17) . . . . ?
Si2 Yb1 O1 Si1 -11.93(16) . . . . ?
Si7 Yb1 O1 Si1 -143.46(13) . . . . ?
Si8 Si7 O2 C2 -177.0(4) . . . . ?
Si9 Si7 O2 C2 -47.4(5) . . . . ?
Si10 Si7 O2 C2 66.2(5) . . . . ?
Yb1 Si7 O2 C2 169.4(6) . . . . ?
Si8 Si7 O2 Yb1 13.6(2) . . . . ?
Si9 Si7 O2 Yb1 143.19(15) . . . . ?
Si10 Si7 O2 Yb1 -103.28(18) . . . . ?
O3 Yb1 O2 C2 -87.1(5) . . . . ?
O1 Yb1 O2 C2 94.3(5) . . . . ?
Si8 Yb1 O2 C2 179.9(5) . . . . ?
Si2 Yb1 O2 C2 18.6(5) . . . . ?
Si1 Yb1 O2 C2 49.5(5) . . . . ?
Si7 Yb1 O2 C2 -169.0(6) . . . . ?
O3 Yb1 O2 Si7 81.9(2) . . . . ?
O1 Yb1 O2 Si7 -96.7(3) . . . . ?
Si8 Yb1 O2 Si7 -11.17(17) . . . . ?
Si2 Yb1 O2 Si7 -172.45(18) . . . . ?
Si1 Yb1 O2 Si7 -141.50(14) . . . . ?
O1 Yb1 O3 C30 -104.2(5) . . . . ?
O2 Yb1 O3 C30 76.7(5) . . . . ?
Si8 Yb1 O3 C30 147.3(5) . . . . ?
Si2 Yb1 O3 C30 -33.5(5) . . . . ?
Si1 Yb1 O3 C30 -76.1(5) . . . . ?
Si7 Yb1 O3 C30 104.8(5) . . . . ?
O1 Yb1 O3 C27 73.0(5) . . . . ?
O2 Yb1 O3 C27 -106.1(5) . . . . ?
Si8 Yb1 O3 C27 -35.5(5) . . . . ?
Si2 Yb1 O3 C27 143.7(5) . . . . ?
Si1 Yb1 O3 C27 101.1(5) . . . . ?
Si7 Yb1 O3 C27 -78.0(5) . . . . ?
C30 O3 C27 C28 -13.4(8) . . . . ?
Yb1 O3 C27 C28 169.0(5) . . . . ?
O3 C27 C28 C29 30.7(9) . . . . ?
C27 C28 C29 C30 -36.3(9) . . . . ?
C27 O3 C30 C29 -9.3(7) . . . . ?
Yb1 O3 C30 C29 168.2(5) . . . . ?
C28 C29 C30 O3 28.4(9) . . . . ?
 
_diffrn_measured_fraction_theta_max    0.981
_diffrn_reflns_theta_full              26.34
_diffrn_measured_fraction_theta_full   0.981
_refine_diff_density_max    3.768
_refine_diff_density_min   -2.473
_refine_diff_density_rms    0.159

# SQUEEZE RESULTS (APPEND TO CIF)
# Note: Data are Listed for all Voids in the P1 Unit Cell
# i.e. Centre of Gravity, Solvent Accessible Volume,
# Recovered number of Electrons in the Void and
# Details about the Squeezed Material
loop_
  _platon_squeeze_void_nr
  _platon_squeeze_void_average_x
  _platon_squeeze_void_average_y
  _platon_squeeze_void_average_z
  _platon_squeeze_void_volume
  _platon_squeeze_void_count_electrons
  _platon_squeeze_void_content
   1  0.000  0.500  0.500        95         6 ' '
   2  0.083  0.028  0.729         7         0 ' '
   3  0.083  0.909  0.796         6         0 ' '
   4  0.302  0.882  0.458         8         0 ' '
   5  0.500  1.000  0.000        71         4 ' '
   6  0.698  0.118  0.542         8         0 ' '
   7  0.917  0.083  0.208         7         0 ' '
   8  0.917  0.964  0.275         6         0 ' '
_platon_squeeze_details
;
;


#===END
data_20_1151j
 
_audit_creation_method            SHELXL-97
_chemical_name_systematic
;
 ?
;
_chemical_name_common             ?
_chemical_melting_point           ?
_chemical_formula_moiety          ?
_chemical_formula_sum
 'C6 H14 Cl N O2 Si'
_chemical_formula_weight          195.72
 
loop_
 _atom_type_symbol
 _atom_type_description
 _atom_type_scat_dispersion_real
 _atom_type_scat_dispersion_imag
 _atom_type_scat_source
 'C'  'C'   0.0033   0.0016
 'International Tables Vol C Tables 4.2.6.8 and 6.1.1.4'
 'H'  'H'   0.0000   0.0000
 'International Tables Vol C Tables 4.2.6.8 and 6.1.1.4'
 'N'  'N'   0.0061   0.0033
 'International Tables Vol C Tables 4.2.6.8 and 6.1.1.4'
 'O'  'O'   0.0106   0.0060
 'International Tables Vol C Tables 4.2.6.8 and 6.1.1.4'
 'Si'  'Si'   0.0817   0.0704
 'International Tables Vol C Tables 4.2.6.8 and 6.1.1.4'
 'Cl'  'Cl'   0.1484   0.1585
 'International Tables Vol C Tables 4.2.6.8 and 6.1.1.4'
 
_symmetry_cell_setting            Monoclinic
_symmetry_space_group_name_H-M    P2(1)/n
 
loop_
 _symmetry_equiv_pos_as_xyz
 'x, y, z'
 '-x+1/2, y+1/2, -z+1/2'
 '-x, -y, -z'
 'x-1/2, -y-1/2, z-1/2'
 
_cell_length_a                    6.8840(13)
_cell_length_b                    11.800(2)
_cell_length_c                    11.154(2)
_cell_angle_alpha                 90.00
_cell_angle_beta                  92.907(3)
_cell_angle_gamma                 90.00
_cell_volume                      904.9(3)
_cell_formula_units_Z             4
_cell_measurement_temperature     100(2)
_cell_measurement_reflns_used     5838
_cell_measurement_theta_min       5.022
_cell_measurement_theta_max       52.548
 
_exptl_crystal_description        plates
_exptl_crystal_colour             colorless
_exptl_crystal_size_max           0.52
_exptl_crystal_size_mid           0.33
_exptl_crystal_size_min           0.11
_exptl_crystal_density_meas       ?
_exptl_crystal_density_diffrn     1.437
_exptl_crystal_density_method     'not measured'
_exptl_crystal_F_000              416
_exptl_absorpt_coefficient_mu     0.509
_exptl_absorpt_correction_type    multi-scan
_exptl_absorpt_correction_T_min   0.7779
_exptl_absorpt_correction_T_max   0.9462
_exptl_absorpt_process_details    SADABS
 
_exptl_special_details
;
 ?
;
 
_diffrn_ambient_temperature       100(2)
_diffrn_radiation_wavelength      0.71073
_diffrn_radiation_type            MoK\a
_diffrn_radiation_source          'fine-focus sealed tube'
_diffrn_radiation_monochromator   graphite
_diffrn_measurement_device_type   'SMART APEX''
_diffrn_measurement_method        '\w scans'
_diffrn_detector_area_resol_mean  ?
_diffrn_standards_number          ?
_diffrn_standards_interval_count  ?
_diffrn_standards_interval_time   ?
_diffrn_standards_decay_%         ?
_diffrn_reflns_number             7036
_diffrn_reflns_av_R_equivalents   0.0169
_diffrn_reflns_av_sigmaI/netI     0.0140
_diffrn_reflns_limit_h_min        -8
_diffrn_reflns_limit_h_max        8
_diffrn_reflns_limit_k_min        -14
_diffrn_reflns_limit_k_max        14
_diffrn_reflns_limit_l_min        -13
_diffrn_reflns_limit_l_max        13
_diffrn_reflns_theta_min          2.51
_diffrn_reflns_theta_max          26.28
_reflns_number_total              1833
_reflns_number_gt                 1780
_reflns_threshold_expression      >2sigma(I)
 
_computing_data_collection        'Bruker XSCANS' 
_computing_cell_refinement        'Bruker XSCANS' 
_computing_data_reduction         'Bruker SHELXTL' 
_computing_structure_solution     'SHELXS-97 (Sheldrick, 1990)' 
_computing_structure_refinement   'SHELXL-97 (Sheldrick, 1997)' 
_computing_molecular_graphics     'Bruker SHELXTL' 
_computing_publication_material   'Bruker SHELXTL' 
 
_refine_special_details
;
 Refinement of F^2^ against ALL reflections.  The weighted R-factor wR and
 goodness of fit S are based on F^2^, conventional R-factors R are based
 on F, with F set to zero for negative F^2^. The threshold expression of
 F^2^ > 2sigma(F^2^) is used only for calculating R-factors(gt) etc. and is
 not relevant to the choice of reflections for refinement.  R-factors based
 on F^2^ are statistically about twice as large as those based on F, and R-
 factors based on ALL data will be even larger.
;
 
_refine_ls_structure_factor_coef  Fsqd
_refine_ls_matrix_type            full
_refine_ls_weighting_scheme       calc
_refine_ls_weighting_details
 'calc w=1/[\s^2^(Fo^2^)+(0.0390P)^2^+0.3726P] where P=(Fo^2^+2Fc^2^)/3'
_atom_sites_solution_primary      direct
_atom_sites_solution_secondary    difmap
_atom_sites_solution_hydrogens    geom
_refine_ls_hydrogen_treatment     constr
_refine_ls_extinction_method      none
_refine_ls_extinction_coef        ?
_refine_ls_number_reflns          1833
_refine_ls_number_parameters      102
_refine_ls_number_restraints      0
_refine_ls_R_factor_all           0.0265
_refine_ls_R_factor_gt            0.0258
_refine_ls_wR_factor_ref          0.0701
_refine_ls_wR_factor_gt           0.0696
_refine_ls_goodness_of_fit_ref    1.109
_refine_ls_restrained_S_all       1.109
_refine_ls_shift/su_max           0.001
_refine_ls_shift/su_mean          0.000
 
loop_
 _atom_site_label
 _atom_site_type_symbol
 _atom_site_fract_x
 _atom_site_fract_y
 _atom_site_fract_z
 _atom_site_U_iso_or_equiv
 _atom_site_adp_type
 _atom_site_occupancy
 _atom_site_symmetry_multiplicity
 _atom_site_calc_flag
 _atom_site_refinement_flags
 _atom_site_disorder_assembly
 _atom_site_disorder_group
Cl1 Cl 1.13671(4) 0.77804(3) 0.41150(3) 0.01822(11) Uani 1 1 d . . .
Si1 Si 0.97646(5) 0.64323(3) 0.30716(3) 0.01350(11) Uani 1 1 d . . .
O1 O 0.77325(12) 0.68439(8) 0.36743(8) 0.0167(2) Uani 1 1 d . . .
O2 O 1.11816(13) 0.54430(8) 0.37048(8) 0.0174(2) Uani 1 1 d . . .
N1 N 0.80498(15) 0.50725(9) 0.23738(9) 0.0154(2) Uani 1 1 d . . .
C5 C 1.0368(2) 0.69773(12) 0.15705(12) 0.0198(3) Uani 1 1 d . . .
H5A H 1.1460 0.6544 0.1274 0.030 Uiso 1 1 calc R . .
H5B H 1.0728 0.7779 0.1637 0.030 Uiso 1 1 calc R . .
H5C H 0.9234 0.6895 0.1010 0.030 Uiso 1 1 calc R . .
C2 C 0.60167(19) 0.54746(12) 0.24557(13) 0.0202(3) Uani 1 1 d . . .
H2A H 0.5119 0.4823 0.2508 0.024 Uiso 1 1 calc R . .
H2B H 0.5615 0.5930 0.1740 0.024 Uiso 1 1 calc R . .
C3 C 0.85792(19) 0.41634(11) 0.32587(12) 0.0181(3) Uani 1 1 d . . .
H3A H 0.8243 0.3408 0.2923 0.022 Uiso 1 1 calc R . .
H3B H 0.7887 0.4272 0.4007 0.022 Uiso 1 1 calc R . .
C4 C 1.0751(2) 0.42707(11) 0.35008(12) 0.0184(3) Uani 1 1 d . . .
H4A H 1.1172 0.3818 0.4215 0.022 Uiso 1 1 calc R . .
H4B H 1.1446 0.3989 0.2804 0.022 Uiso 1 1 calc R . .
C1 C 0.59808(19) 0.61931(12) 0.35803(13) 0.0215(3) Uani 1 1 d . . .
H1A H 0.4837 0.6703 0.3534 0.026 Uiso 1 1 calc R . .
H1B H 0.5890 0.5702 0.4295 0.026 Uiso 1 1 calc R . .
C6 C 0.8354(2) 0.46461(11) 0.11444(12) 0.0198(3) Uani 1 1 d . . .
H6A H 0.7521 0.3985 0.0981 0.030 Uiso 1 1 calc R . .
H6B H 0.9720 0.4429 0.1083 0.030 Uiso 1 1 calc R . .
H6C H 0.8022 0.5243 0.0558 0.030 Uiso 1 1 calc R . .
 
loop_
 _atom_site_aniso_label
 _atom_site_aniso_U_11
 _atom_site_aniso_U_22
 _atom_site_aniso_U_33
 _atom_site_aniso_U_23
 _atom_site_aniso_U_13
 _atom_site_aniso_U_12
Cl1 0.01738(17) 0.01814(18) 0.01887(18) -0.00262(11) -0.00176(12) -0.00184(11)
Si1 0.01239(18) 0.01431(19) 0.01378(19) 0.00036(12) 0.00062(13) 0.00051(12)
O1 0.0129(4) 0.0162(4) 0.0212(5) -0.0025(4) 0.0021(3) 0.0000(3)
O2 0.0169(4) 0.0157(5) 0.0192(5) -0.0002(4) -0.0016(3) 0.0023(3)
N1 0.0158(5) 0.0158(5) 0.0147(5) 0.0001(4) 0.0011(4) -0.0005(4)
C5 0.0214(6) 0.0213(7) 0.0167(6) 0.0013(5) 0.0010(5) -0.0052(5)
C2 0.0140(6) 0.0207(7) 0.0258(7) -0.0010(5) -0.0003(5) -0.0014(5)
C3 0.0237(7) 0.0148(6) 0.0159(6) 0.0016(5) 0.0028(5) -0.0008(5)
C4 0.0227(6) 0.0146(6) 0.0178(6) 0.0004(5) 0.0011(5) 0.0036(5)
C1 0.0133(6) 0.0226(7) 0.0289(7) -0.0028(6) 0.0042(5) -0.0021(5)
C6 0.0260(7) 0.0191(7) 0.0143(6) -0.0012(5) 0.0014(5) -0.0030(5)
 
_geom_special_details
;
 All esds (except the esd in the dihedral angle between two l.s. planes)
 are estimated using the full covariance matrix.  The cell esds are taken
 into account individually in the estimation of esds in distances, angles
 and torsion angles; correlations between esds in cell parameters are only
 used when they are defined by crystal symmetry.  An approximate (isotropic)
 treatment of cell esds is used for estimating esds involving l.s. planes.
;
 
loop_
 _geom_bond_atom_site_label_1
 _geom_bond_atom_site_label_2
 _geom_bond_distance
 _geom_bond_site_symmetry_2
 _geom_bond_publ_flag
Cl1 Si1 2.2297(5) . ?
Si1 O1 1.6553(9) . ?
Si1 O2 1.6563(10) . ?
Si1 C5 1.8600(14) . ?
Si1 N1 2.1168(11) . ?
O1 C1 1.4290(16) . ?
O2 C4 1.4305(16) . ?
N1 C2 1.4850(17) . ?
N1 C6 1.4854(16) . ?
N1 C3 1.4904(16) . ?
C2 C1 1.5153(19) . ?
C3 C4 1.5114(19) . ?
 
loop_
 _geom_angle_atom_site_label_1
 _geom_angle_atom_site_label_2
 _geom_angle_atom_site_label_3
 _geom_angle
 _geom_angle_site_symmetry_1
 _geom_angle_site_symmetry_3
 _geom_angle_publ_flag
O1 Si1 O2 121.69(5) . . ?
O1 Si1 C5 119.73(6) . . ?
O2 Si1 C5 118.29(6) . . ?
O1 Si1 N1 84.53(5) . . ?
O2 Si1 N1 85.86(5) . . ?
C5 Si1 N1 94.41(5) . . ?
O1 Si1 Cl1 89.12(4) . . ?
O2 Si1 Cl1 90.87(4) . . ?
C5 Si1 Cl1 95.51(5) . . ?
N1 Si1 Cl1 169.95(3) . . ?
C1 O1 Si1 122.68(8) . . ?
C4 O2 Si1 120.08(8) . . ?
C2 N1 C6 110.03(10) . . ?
C2 N1 C3 112.88(10) . . ?
C6 N1 C3 109.05(10) . . ?
C2 N1 Si1 104.17(8) . . ?
C6 N1 Si1 119.61(8) . . ?
C3 N1 Si1 100.90(8) . . ?
N1 C2 C1 106.54(10) . . ?
N1 C3 C4 105.34(10) . . ?
O2 C4 C3 107.72(10) . . ?
O1 C1 C2 108.20(11) . . ?
 
loop_
 _geom_torsion_atom_site_label_1
 _geom_torsion_atom_site_label_2
 _geom_torsion_atom_site_label_3
 _geom_torsion_atom_site_label_4
 _geom_torsion
 _geom_torsion_site_symmetry_1
 _geom_torsion_site_symmetry_2
 _geom_torsion_site_symmetry_3
 _geom_torsion_site_symmetry_4
 _geom_torsion_publ_flag
O2 Si1 O1 C1 -77.54(11) . . . . ?
C5 Si1 O1 C1 96.14(11) . . . . ?
N1 Si1 O1 C1 4.17(10) . . . . ?
Cl1 Si1 O1 C1 -168.02(10) . . . . ?
O1 Si1 O2 C4 83.19(10) . . . . ?
C5 Si1 O2 C4 -90.57(10) . . . . ?
N1 Si1 O2 C4 2.22(9) . . . . ?
Cl1 Si1 O2 C4 172.70(9) . . . . ?
O1 Si1 N1 C2 18.74(8) . . . . ?
O2 Si1 N1 C2 141.15(8) . . . . ?
C5 Si1 N1 C2 -100.75(9) . . . . ?
Cl1 Si1 N1 C2 69.8(2) . . . . ?
O1 Si1 N1 C6 142.11(10) . . . . ?
O2 Si1 N1 C6 -95.48(10) . . . . ?
C5 Si1 N1 C6 22.61(10) . . . . ?
Cl1 Si1 N1 C6 -166.79(16) . . . . ?
O1 Si1 N1 C3 -98.44(8) . . . . ?
O2 Si1 N1 C3 23.96(8) . . . . ?
C5 Si1 N1 C3 142.06(8) . . . . ?
Cl1 Si1 N1 C3 -47.3(2) . . . . ?
C6 N1 C2 C1 -163.87(11) . . . . ?
C3 N1 C2 C1 74.06(13) . . . . ?
Si1 N1 C2 C1 -34.49(11) . . . . ?
C2 N1 C3 C4 -152.27(10) . . . . ?
C6 N1 C3 C4 85.12(12) . . . . ?
Si1 N1 C3 C4 -41.67(10) . . . . ?
Si1 O2 C4 C3 -28.32(13) . . . . ?
N1 C3 C4 O2 46.74(13) . . . . ?
Si1 O1 C1 C2 -26.03(15) . . . . ?
N1 C2 C1 O1 39.06(14) . . . . ?
 
_diffrn_measured_fraction_theta_max    0.998
_diffrn_reflns_theta_full              26.28
_diffrn_measured_fraction_theta_full   0.998
_refine_diff_density_max    0.386
_refine_diff_density_min   -0.195
_refine_diff_density_rms    0.052

#===END
data_22_1191j
 
_audit_creation_method            SHELXL-97
_chemical_name_systematic
;
 ?
;
_chemical_name_common             ?
_chemical_melting_point           ?
_chemical_formula_moiety          ?
_chemical_formula_sum
 'C24 H64 N2 O4 Si8 Yb'
_chemical_formula_weight          842.53
 
loop_
 _atom_type_symbol
 _atom_type_description
 _atom_type_scat_dispersion_real
 _atom_type_scat_dispersion_imag
 _atom_type_scat_source
 'C'  'C'   0.0033   0.0016
 'International Tables Vol C Tables 4.2.6.8 and 6.1.1.4'
 'H'  'H'   0.0000   0.0000
 'International Tables Vol C Tables 4.2.6.8 and 6.1.1.4'
 'O'  'O'   0.0106   0.0060
 'International Tables Vol C Tables 4.2.6.8 and 6.1.1.4'
 'Si'  'Si'   0.0817   0.0704
 'International Tables Vol C Tables 4.2.6.8 and 6.1.1.4'
 'Yb'  'Yb'  -0.3850   5.5486
 'International Tables Vol C Tables 4.2.6.8 and 6.1.1.4'
 'N'  'N'   0.0061   0.0033
 'International Tables Vol C Tables 4.2.6.8 and 6.1.1.4'
 
_symmetry_cell_setting            monoclinic
_symmetry_space_group_name_H-M    C2
 
loop_
 _symmetry_equiv_pos_as_xyz
 'x, y, z'
 '-x, y, -z'
 'x+1/2, y+1/2, z'
 '-x+1/2, y+1/2, -z'
 
_cell_length_a                    17.833(3)
_cell_length_b                    10.295(3)
_cell_length_c                    13.216(3)
_cell_angle_alpha                 90.00
_cell_angle_beta                  121.406(5)
_cell_angle_gamma                 90.00
_cell_volume                      2071.0(9)
_cell_formula_units_Z             2
_cell_measurement_temperature     100(2)
_cell_measurement_reflns_used     7487
_cell_measurement_theta_min       4.626
_cell_measurement_theta_max       52.514
 
_exptl_crystal_description        plates
_exptl_crystal_colour             orange
_exptl_crystal_size_max           0.18
_exptl_crystal_size_mid           0.16
_exptl_crystal_size_min           0.08
_exptl_crystal_density_meas       ?
_exptl_crystal_density_diffrn     1.351
_exptl_crystal_density_method     'not measured'
_exptl_crystal_F_000              872
_exptl_absorpt_coefficient_mu     2.517
_exptl_absorpt_correction_type    multi-scan
_exptl_absorpt_correction_T_min   0.6600
_exptl_absorpt_correction_T_max   0.8240
_exptl_absorpt_process_details    SADABS
 
_exptl_special_details
;
 ?
;
 
_diffrn_ambient_temperature       100(2)
_diffrn_radiation_wavelength      0.71073
_diffrn_radiation_type            MoK\a
_diffrn_radiation_source          'fine-focus sealed tube'
_diffrn_radiation_monochromator   graphite
_diffrn_measurement_device_type   'SMART APEX''
_diffrn_measurement_method        '\w scans'
_diffrn_detector_area_resol_mean  ?
_diffrn_standards_number          ?
_diffrn_standards_interval_count  ?
_diffrn_standards_interval_time   ?
_diffrn_standards_decay_%         ?
_diffrn_reflns_number             8284
_diffrn_reflns_av_R_equivalents   0.0320
_diffrn_reflns_av_sigmaI/netI     0.0436
_diffrn_reflns_limit_h_min        -22
_diffrn_reflns_limit_h_max        22
_diffrn_reflns_limit_k_min        -12
_diffrn_reflns_limit_k_max        12
_diffrn_reflns_limit_l_min        -16
_diffrn_reflns_limit_l_max        16
_diffrn_reflns_theta_min          1.81
_diffrn_reflns_theta_max          26.35
_reflns_number_total              4085
_reflns_number_gt                 4084
_reflns_threshold_expression      >2sigma(I)
 
_computing_data_collection        'Bruker XSCANS' 
_computing_cell_refinement        'Bruker XSCANS' 
_computing_data_reduction         'Bruker SHELXTL' 
_computing_structure_solution     'SHELXS-97 (Sheldrick, 1990)' 
_computing_structure_refinement   'SHELXL-97 (Sheldrick, 1997)' 
_computing_molecular_graphics     'Bruker SHELXTL' 
_computing_publication_material   'Bruker SHELXTL'
 
_refine_special_details
;
 Refinement of F^2^ against ALL reflections.  The weighted R-factor wR and
 goodness of fit S are based on F^2^, conventional R-factors R are based
 on F, with F set to zero for negative F^2^. The threshold expression of
 F^2^ > 2sigma(F^2^) is used only for calculating R-factors(gt) etc. and is
 not relevant to the choice of reflections for refinement.  R-factors based
 on F^2^ are statistically about twice as large as those based on F, and R-
 factors based on ALL data will be even larger.
;
 
_refine_ls_structure_factor_coef  Fsqd
_refine_ls_matrix_type            full
_refine_ls_weighting_scheme       calc
_refine_ls_weighting_details
 'calc w=1/[\s^2^(Fo^2^)+(0.1402P)^2^+13.3813P] where P=(Fo^2^+2Fc^2^)/3'
_atom_sites_solution_primary      direct
_atom_sites_solution_secondary    difmap
_atom_sites_solution_hydrogens    constr
_refine_ls_hydrogen_treatment     mixed
_refine_ls_extinction_method      none
_refine_ls_extinction_coef        ?
_refine_ls_abs_structure_details
 'Flack H D (1983), Acta Cryst. A39, 876-881'
_refine_ls_abs_structure_Flack    0.448(18)
_refine_ls_number_reflns          4085
_refine_ls_number_parameters      186
_refine_ls_number_restraints      22
_refine_ls_R_factor_all           0.0659
_refine_ls_R_factor_gt            0.0659
_refine_ls_wR_factor_ref          0.1769
_refine_ls_wR_factor_gt           0.1769
_refine_ls_goodness_of_fit_ref    1.117
_refine_ls_restrained_S_all       1.116
_refine_ls_shift/su_max           0.002
_refine_ls_shift/su_mean          0.000
 
loop_
 _atom_site_label
 _atom_site_type_symbol
 _atom_site_fract_x
 _atom_site_fract_y
 _atom_site_fract_z
 _atom_site_U_iso_or_equiv
 _atom_site_adp_type
 _atom_site_occupancy
 _atom_site_symmetry_multiplicity
 _atom_site_calc_flag
 _atom_site_refinement_flags
 _atom_site_disorder_assembly
 _atom_site_disorder_group
Yb1 Yb 0.5000 0.3417(2) 0.0000 0.01386(18) Uani 1 2 d S . .
Si1 Si 0.68159(16) 0.2417(4) 0.1865(3) 0.0208(6) Uani 1 1 d D . .
Si3 Si 0.6878(3) 0.0150(4) 0.1921(3) 0.0288(7) Uani 1 1 d . . .
Si2 Si 0.6150(2) 0.2762(3) 0.2945(3) 0.0249(7) Uani 1 1 d D . .
C8 C 0.6973(9) -0.0410(15) 0.0635(14) 0.037(3) Uani 1 1 d . . .
H8A H 0.6862 -0.1347 0.0522 0.055 Uiso 1 1 calc R . .
H8B H 0.7565 -0.0226 0.0799 0.055 Uiso 1 1 calc R . .
H8C H 0.6540 0.0050 -0.0086 0.055 Uiso 1 1 calc R . .
C1 C 0.6305(8) 0.1768(13) 0.4218(11) 0.029(3) Uani 1 1 d U . .
H1A H 0.6934 0.1641 0.4782 0.044 Uiso 1 1 calc R . .
H1B H 0.6020 0.0922 0.3929 0.044 Uiso 1 1 calc R . .
H1C H 0.6042 0.2219 0.4612 0.044 Uiso 1 1 calc R . .
C5 C 0.5114(8) 0.5857(12) 0.2125(11) 0.028(2) Uani 1 1 d . . .
H5A H 0.4914 0.5744 0.2692 0.034 Uiso 1 1 calc R . .
H5B H 0.5099 0.6799 0.1964 0.034 Uiso 1 1 calc R . .
C10 C 0.8642(11) 0.2695(17) 0.4787(12) 0.044(4) Uani 1 1 d . . .
H10A H 0.8636 0.3478 0.5205 0.067 Uiso 1 1 calc R . .
H10B H 0.9242 0.2353 0.5170 0.067 Uiso 1 1 calc R . .
H10C H 0.8255 0.2038 0.4812 0.067 Uiso 1 1 calc R . .
C7 C 0.5854(14) -0.0595(18) 0.1703(18) 0.054(4) Uani 1 1 d . . .
H7A H 0.5349 -0.0057 0.1159 0.081 Uiso 1 1 calc R . .
H7B H 0.5891 -0.0654 0.2468 0.081 Uiso 1 1 calc R . .
H7C H 0.5783 -0.1467 0.1368 0.081 Uiso 1 1 calc R . .
C2 C 0.4423(7) 0.328(3) 0.2070(10) 0.035(4) Uani 1 1 d . . .
H2A H 0.4024 0.2605 0.2062 0.042 Uiso 1 1 calc R . .
H2B H 0.4738 0.3679 0.2868 0.042 Uiso 1 1 calc R . .
C4 C 0.6073(9) 0.5394(12) 0.2728(12) 0.028(3) Uani 1 1 d . . .
H4A H 0.6220 0.5223 0.2115 0.034 Uiso 1 1 calc R . .
H4B H 0.6466 0.6092 0.3251 0.034 Uiso 1 1 calc R . .
C9 C 0.7821(13) -0.0647(18) 0.3317(14) 0.050(4) Uani 1 1 d . . .
H9A H 0.7818 -0.0334 0.4016 0.075 Uiso 1 1 calc R . .
H9B H 0.8382 -0.0423 0.3392 0.075 Uiso 1 1 calc R . .
H9C H 0.7745 -0.1592 0.3258 0.075 Uiso 1 1 calc R . .
C11 C 0.9036(11) 0.232(2) 0.2834(17) 0.053(5) Uani 1 1 d . . .
H11A H 0.8870 0.2561 0.2024 0.079 Uiso 1 1 calc R . .
H11B H 0.9013 0.1378 0.2894 0.079 Uiso 1 1 calc R . .
H11C H 0.9635 0.2629 0.3391 0.079 Uiso 1 1 calc R . .
C3 C 0.3906(8) 0.4270(12) 0.1193(11) 0.024(2) Uani 1 1 d . . .
H3A H 0.3560 0.4760 0.1456 0.029 Uiso 1 1 calc R . .
H3B H 0.3489 0.3846 0.0429 0.029 Uiso 1 1 calc R . .
O2 O 0.5065(5) 0.2666(8) 0.1836(7) 0.0204(16) Uani 1 1 d . . .
N1 N 0.4482(8) 0.5203(10) 0.1012(10) 0.026(2) Uani 1 1 d . . .
C6 C 0.3883(11) 0.6098(14) 0.0117(13) 0.038(3) Uani 1 1 d . . .
H6A H 0.3594 0.6625 0.0434 0.057 Uiso 1 1 calc R . .
H6B H 0.3439 0.5612 -0.0575 0.057 Uiso 1 1 calc R . .
H6C H 0.4208 0.6665 -0.0117 0.057 Uiso 1 1 calc R . .
C12 C 0.8346(9) 0.4933(3) 0.3088(13) 0.033(3) Uani 1 1 d DU . .
H12A H 0.8022 0.5384 0.3397 0.049 Uiso 1 1 calc R . .
H12B H 0.8101 0.5171 0.2256 0.049 Uiso 1 1 calc R . .
H12C H 0.8967 0.5185 0.3551 0.049 Uiso 1 1 calc R . .
Si4 Si 0.82466(17) 0.3110(3) 0.3207(3) 0.0364(13) Uani 1 1 d D . .
O1 O 0.6220(7) 0.4277(4) 0.3394(10) 0.035(3) Uani 1 1 d DU . .
 
loop_
 _atom_site_aniso_label
 _atom_site_aniso_U_11
 _atom_site_aniso_U_22
 _atom_site_aniso_U_33
 _atom_site_aniso_U_23
 _atom_site_aniso_U_13
 _atom_site_aniso_U_12
Yb1 0.0155(3) 0.0139(3) 0.0126(3) 0.000 0.00770(19) 0.000
Si1 0.0191(14) 0.0196(14) 0.0211(14) 0.0011(12) 0.0085(12) 0.0001(12)
Si3 0.0346(17) 0.0209(15) 0.0331(17) -0.0027(13) 0.0191(15) -0.0033(14)
Si2 0.0276(17) 0.0196(15) 0.0280(18) -0.0016(15) 0.0147(15) -0.0014(13)
C8 0.027(6) 0.039(8) 0.049(8) -0.008(6) 0.022(6) -0.010(6)
C1 0.031(5) 0.030(5) 0.021(5) 0.014(4) 0.009(4) -0.002(4)
C5 0.034(6) 0.022(6) 0.029(6) -0.004(5) 0.018(5) 0.000(5)
C10 0.049(9) 0.049(9) 0.019(6) -0.005(6) 0.006(6) -0.017(7)
C7 0.075(12) 0.046(9) 0.063(11) -0.016(8) 0.051(10) -0.020(9)
C2 0.022(4) 0.064(12) 0.028(5) 0.014(9) 0.019(4) 0.001(9)
C4 0.040(7) 0.013(5) 0.038(7) -0.004(5) 0.024(6) -0.005(5)
C9 0.065(10) 0.049(9) 0.036(8) 0.008(7) 0.027(8) 0.026(8)
C11 0.030(7) 0.071(12) 0.052(10) -0.026(9) 0.017(7) -0.017(7)
C3 0.027(6) 0.026(5) 0.027(6) 0.000(5) 0.018(5) 0.000(5)
O2 0.023(4) 0.022(4) 0.020(4) -0.003(3) 0.014(3) -0.003(3)
N1 0.044(6) 0.014(4) 0.034(6) 0.002(4) 0.031(5) 0.007(4)
C6 0.051(8) 0.023(6) 0.039(8) -0.001(6) 0.023(7) 0.005(6)
C12 0.033(3) 0.032(3) 0.033(3) 0.0002(10) 0.0169(16) -0.0009(10)
Si4 0.0173(13) 0.071(4) 0.0189(13) -0.0153(16) 0.0081(11) -0.0156(16)
O1 0.034(3) 0.034(3) 0.037(3) 0.0016(10) 0.0181(16) -0.0011(10)
 
_geom_special_details
;
 All esds (except the esd in the dihedral angle between two l.s. planes)
 are estimated using the full covariance matrix.  The cell esds are taken
 into account individually in the estimation of esds in distances, angles
 and torsion angles; correlations between esds in cell parameters are only
 used when they are defined by crystal symmetry.  An approximate (isotropic)
 treatment of cell esds is used for estimating esds involving l.s. planes.
;
 
loop_
 _geom_bond_atom_site_label_1
 _geom_bond_atom_site_label_2
 _geom_bond_distance
 _geom_bond_site_symmetry_2
 _geom_bond_publ_flag
Yb1 O2 2.491(8) . ?
Yb1 O2 2.491(8) 2_655 ?
Yb1 N1 2.705(9) . ?
Yb1 N1 2.705(9) 2_655 ?
Yb1 Si1 3.050(3) . ?
Yb1 Si1 3.050(3) 2_655 ?
Yb1 C3 3.204(11) 2_655 ?
Yb1 Si2 3.390(4) . ?
Yb1 Si2 3.390(4) 2_655 ?
Si1 Si2 2.311(5) . ?
Si1 Si4 2.3336(11) . ?
Si1 Si3 2.336(5) . ?
Si3 C7 1.859(18) . ?
Si3 C8 1.884(15) . ?
Si3 C9 1.917(17) . ?
Si2 O1 1.6497(11) . ?
Si2 O2 1.717(9) . ?
Si2 C1 1.862(12) . ?
C5 N1 1.469(17) . ?
C5 C4 1.539(18) . ?
C10 Si4 1.872(15) . ?
C2 C3 1.46(2) . ?
C2 O2 1.475(18) . ?
C4 O1 1.388(16) . ?
C11 Si4 1.898(18) . ?
C3 N1 1.513(15) . ?
N1 C6 1.439(18) . ?
C12 Si4 1.8998(12) . ?
 
loop_
 _geom_angle_atom_site_label_1
 _geom_angle_atom_site_label_2
 _geom_angle_atom_site_label_3
 _geom_angle
 _geom_angle_site_symmetry_1
 _geom_angle_site_symmetry_3
 _geom_angle_publ_flag
O2 Yb1 O2 143.8(4) . 2_655 ?
O2 Yb1 N1 65.4(3) . . ?
O2 Yb1 N1 147.0(3) 2_655 . ?
O2 Yb1 N1 147.0(3) . 2_655 ?
O2 Yb1 N1 65.4(3) 2_655 2_655 ?
N1 Yb1 N1 94.3(4) . 2_655 ?
O2 Yb1 Si1 67.49(19) . . ?
O2 Yb1 Si1 99.99(19) 2_655 . ?
N1 Yb1 Si1 108.8(3) . . ?
N1 Yb1 Si1 97.9(3) 2_655 . ?
O2 Yb1 Si1 99.99(19) . 2_655 ?
O2 Yb1 Si1 67.49(19) 2_655 2_655 ?
N1 Yb1 Si1 97.9(3) . 2_655 ?
N1 Yb1 Si1 108.8(3) 2_655 2_655 ?
Si1 Yb1 Si1 140.56(11) . 2_655 ?
O2 Yb1 C3 146.4(3) . 2_655 ?
O2 Yb1 C3 48.5(3) 2_655 2_655 ?
N1 Yb1 C3 120.6(3) . 2_655 ?
N1 Yb1 C3 28.1(3) 2_655 2_655 ?
Si1 Yb1 C3 80.1(2) . 2_655 ?
Si1 Yb1 C3 110.9(2) 2_655 2_655 ?
O2 Yb1 Si2 29.15(19) . . ?
O2 Yb1 Si2 138.58(19) 2_655 . ?
N1 Yb1 Si2 74.1(2) . . ?
N1 Yb1 Si2 123.0(3) 2_655 . ?
Si1 Yb1 Si2 41.63(9) . . ?
Si1 Yb1 Si2 127.82(8) 2_655 . ?
C3 Yb1 Si2 117.4(2) 2_655 . ?
O2 Yb1 Si2 138.58(19) . 2_655 ?
O2 Yb1 Si2 29.15(19) 2_655 2_655 ?
N1 Yb1 Si2 123.0(3) . 2_655 ?
N1 Yb1 Si2 74.1(2) 2_655 2_655 ?
Si1 Yb1 Si2 127.82(8) . 2_655 ?
Si1 Yb1 Si2 41.63(9) 2_655 2_655 ?
C3 Yb1 Si2 69.4(2) 2_655 2_655 ?
Si2 Yb1 Si2 157.06(12) . 2_655 ?
Si2 Si1 Si4 101.20(17) . . ?
Si2 Si1 Si3 99.52(17) . . ?
Si4 Si1 Si3 105.45(19) . . ?
Si2 Si1 Yb1 77.08(12) . . ?
Si4 Si1 Yb1 142.26(17) . . ?
Si3 Si1 Yb1 112.05(13) . . ?
C7 Si3 C8 106.0(7) . . ?
C7 Si3 C9 105.7(9) . . ?
C8 Si3 C9 106.9(7) . . ?
C7 Si3 Si1 112.4(7) . . ?
C8 Si3 Si1 107.6(5) . . ?
C9 Si3 Si1 117.5(6) . . ?
O1 Si2 O2 101.6(5) . . ?
O1 Si2 C1 104.3(6) . . ?
O2 Si2 C1 108.1(5) . . ?
O1 Si2 Si1 113.6(4) . . ?
O2 Si2 Si1 100.2(3) . . ?
C1 Si2 Si1 126.2(5) . . ?
O1 Si2 Yb1 96.4(4) . . ?
O2 Si2 Yb1 45.0(3) . . ?
C1 Si2 Yb1 149.6(4) . . ?
Si1 Si2 Yb1 61.29(11) . . ?
N1 C5 C4 116.3(10) . . ?
C3 C2 O2 111.8(9) . . ?
O1 C4 C5 112.1(11) . . ?
C2 C3 N1 111.7(11) . . ?
C2 O2 Si2 116.7(8) . . ?
C2 O2 Yb1 115.1(8) . . ?
Si2 O2 Yb1 105.9(4) . . ?
C6 N1 C5 112.5(10) . . ?
C6 N1 C3 105.2(11) . . ?
C5 N1 C3 111.3(9) . . ?
C6 N1 Yb1 109.1(8) . . ?
C5 N1 Yb1 121.7(8) . . ?
C3 N1 Yb1 94.7(6) . . ?
C10 Si4 C11 107.1(9) . . ?
C10 Si4 C12 108.7(7) . . ?
C11 Si4 C12 106.6(8) . . ?
C10 Si4 Si1 113.9(5) . . ?
C11 Si4 Si1 109.8(5) . . ?
C12 Si4 Si1 110.6(5) . . ?
C4 O1 Si2 127.0(8) . . ?
 
_diffrn_measured_fraction_theta_max    0.993
_diffrn_reflns_theta_full              26.35
_diffrn_measured_fraction_theta_full   0.993
_refine_diff_density_max    2.863
_refine_diff_density_min   -1.804
_refine_diff_density_rms    0.345


# SQUEEZE RESULTS (APPEND TO CIF)
# Note: Data are Listed for all Voids in the P1 Unit Cell
# i.e. Centre of Gravity, Solvent Accessible Volume,
# Recovered number of Electrons in the Void and
# Details about the Squeezed Material
loop_
  _platon_squeeze_void_nr
  _platon_squeeze_void_average_x
  _platon_squeeze_void_average_y
  _platon_squeeze_void_average_z
  _platon_squeeze_void_volume
  _platon_squeeze_void_count_electrons
  _platon_squeeze_void_content
   1  0.000 -0.054  0.500        27         3 ' '
   2  0.500  0.446  0.500        27         3 ' '
_platon_squeeze_details
;
;


#===END
data_23_1220j
 
_audit_creation_method            SHELXL-97
_chemical_name_systematic
;
 ?
;
_chemical_name_common             ?
_chemical_melting_point           ?
_chemical_formula_moiety          ?
_chemical_formula_sum
 'C24 H64 Eu N2 O4 Si8'
_chemical_formula_weight          821.45
 
loop_
 _atom_type_symbol
 _atom_type_description
 _atom_type_scat_dispersion_real
 _atom_type_scat_dispersion_imag
 _atom_type_scat_source
 'C'  'C'   0.0033   0.0016
 'International Tables Vol C Tables 4.2.6.8 and 6.1.1.4'
 'H'  'H'   0.0000   0.0000
 'International Tables Vol C Tables 4.2.6.8 and 6.1.1.4'
 'N'  'N'   0.0061   0.0033
 'International Tables Vol C Tables 4.2.6.8 and 6.1.1.4'
 'O'  'O'   0.0106   0.0060
 'International Tables Vol C Tables 4.2.6.8 and 6.1.1.4'
 'Si'  'Si'   0.0817   0.0704
 'International Tables Vol C Tables 4.2.6.8 and 6.1.1.4'
 'Eu'  'Eu'  -0.1578   3.6682
 'International Tables Vol C Tables 4.2.6.8 and 6.1.1.4'
 
_symmetry_cell_setting            monoclinic
_symmetry_space_group_name_H-M    c2/c
 
loop_
 _symmetry_equiv_pos_as_xyz
 'x, y, z'
 '-x, y, -z+1/2'
 'x+1/2, y+1/2, z'
 '-x+1/2, y+1/2, -z+1/2'
 '-x, -y, -z'
 'x, -y, z-1/2'
 '-x+1/2, -y+1/2, -z'
 'x+1/2, -y+1/2, z-1/2'
 
_cell_length_a                    23.449(14)
_cell_length_b                    10.198(5)
_cell_length_c                    17.953(9)
_cell_angle_alpha                 90.00
_cell_angle_beta                  100.484(14)
_cell_angle_gamma                 90.00
_cell_volume                      4221(4)
_cell_formula_units_Z             4
_cell_measurement_temperature     100(2)
_cell_measurement_reflns_used     7044
_cell_measurement_theta_min       4.346
_cell_measurement_theta_max       52.499
 
_exptl_crystal_description        plates
_exptl_crystal_colour             yellow
_exptl_crystal_size_max           0.34
_exptl_crystal_size_mid           0.12
_exptl_crystal_size_min           0.08
_exptl_crystal_density_meas       ?
_exptl_crystal_density_diffrn     1.292
_exptl_crystal_density_method     'not measured'
_exptl_crystal_F_000              1716
_exptl_absorpt_coefficient_mu     1.740
_exptl_absorpt_correction_type    multi-scan
_exptl_absorpt_correction_T_min   0.5892
_exptl_absorpt_correction_T_max   0.8733
_exptl_absorpt_process_details    SADABS
 
_exptl_special_details
;
 ?
;
 
_diffrn_ambient_temperature       100(2)
_diffrn_radiation_wavelength      0.71073
_diffrn_radiation_type            MoK\a
_diffrn_radiation_source          'fine-focus sealed tube'
_diffrn_radiation_monochromator   graphite
_diffrn_measurement_device_type   'SMART APEX'
_diffrn_measurement_method        '\w scans'
_diffrn_detector_area_resol_mean  ?
_diffrn_standards_number          ?
_diffrn_standards_interval_count  ?
_diffrn_standards_interval_time   ?
_diffrn_standards_decay_%         ?
_diffrn_reflns_number             15593
_diffrn_reflns_av_R_equivalents   0.0893
_diffrn_reflns_av_sigmaI/netI     0.0785
_diffrn_reflns_limit_h_min        -29
_diffrn_reflns_limit_h_max        29
_diffrn_reflns_limit_k_min        -12
_diffrn_reflns_limit_k_max        12
_diffrn_reflns_limit_l_min        -22
_diffrn_reflns_limit_l_max        22
_diffrn_reflns_theta_min          1.77
_diffrn_reflns_theta_max          26.38
_reflns_number_total              4301
_reflns_number_gt                 3648
_reflns_threshold_expression      >2sigma(I)
 
_computing_data_collection        'Bruker XSCANS' 
_computing_cell_refinement        'Bruker XSCANS' 
_computing_data_reduction         'Bruker SHELXTL' 
_computing_structure_solution     'SHELXS-97 (Sheldrick, 1990)' 
_computing_structure_refinement   'SHELXL-97 (Sheldrick, 1997)' 
_computing_molecular_graphics     'Bruker SHELXTL' 
_computing_publication_material   'Bruker SHELXTL' 
 
_refine_special_details
;
 Refinement of F^2^ against ALL reflections.  The weighted R-factor wR and
 goodness of fit S are based on F^2^, conventional R-factors R are based
 on F, with F set to zero for negative F^2^. The threshold expression of
 F^2^ > 2sigma(F^2^) is used only for calculating R-factors(gt) etc. and is
 not relevant to the choice of reflections for refinement.  R-factors based
 on F^2^ are statistically about twice as large as those based on F, and R-
 factors based on ALL data will be even larger.
;
 
_refine_ls_structure_factor_coef  Fsqd
_refine_ls_matrix_type            full
_refine_ls_weighting_scheme       calc
_refine_ls_weighting_details
 'calc w=1/[\s^2^(Fo^2^)+(0.0849P)^2^+16.8054P] where P=(Fo^2^+2Fc^2^)/3'
_atom_sites_solution_primary      direct
_atom_sites_solution_secondary    difmap
_atom_sites_solution_hydrogens    geom
_refine_ls_hydrogen_treatment     constr
_refine_ls_extinction_method      none
_refine_ls_extinction_coef        ?
_refine_ls_number_reflns          4301
_refine_ls_number_parameters      185
_refine_ls_number_restraints      0
_refine_ls_R_factor_all           0.0814
_refine_ls_R_factor_gt            0.0690
_refine_ls_wR_factor_ref          0.1698
_refine_ls_wR_factor_gt           0.1628
_refine_ls_goodness_of_fit_ref    1.128
_refine_ls_restrained_S_all       1.128
_refine_ls_shift/su_max           0.000
_refine_ls_shift/su_mean          0.000
 
loop_
 _atom_site_label
 _atom_site_type_symbol
 _atom_site_fract_x
 _atom_site_fract_y
 _atom_site_fract_z
 _atom_site_U_iso_or_equiv
 _atom_site_adp_type
 _atom_site_occupancy
 _atom_site_symmetry_multiplicity
 _atom_site_calc_flag
 _atom_site_refinement_flags
 _atom_site_disorder_assembly
 _atom_site_disorder_group
Eu1 Eu 0.0000 0.24532(4) 0.2500 0.02214(18) Uani 1 2 d S . .
Si3 Si 0.15952(9) 0.27882(19) 0.08305(11) 0.0294(4) Uani 1 1 d . . .
Si1 Si 0.09468(8) 0.34826(18) 0.15976(9) 0.0244(4) Uani 1 1 d . . .
Si4 Si 0.14846(7) 0.31270(19) 0.27974(10) 0.0242(4) Uani 1 1 d . . .
Si2 Si 0.09735(9) 0.57770(19) 0.15597(10) 0.0308(4) Uani 1 1 d . . .
O1 O 0.17313(18) 0.1610(5) 0.2964(2) 0.0282(10) Uani 1 1 d . . .
O2 O 0.09576(18) 0.3246(4) 0.3348(2) 0.0240(9) Uani 1 1 d . . .
N1 N -0.0563(2) 0.0692(5) 0.1445(3) 0.0266(12) Uani 1 1 d . . .
C9 C 0.1086(3) 0.2715(7) 0.4103(4) 0.0309(16) Uani 1 1 d . . .
H9A H 0.1067 0.3419 0.4477 0.037 Uiso 1 1 calc R . .
H9B H 0.1483 0.2346 0.4201 0.037 Uiso 1 1 calc R . .
C12 C -0.0654(3) 0.1657(6) 0.0814(3) 0.0263(14) Uani 1 1 d . . .
H12A H -0.0788 0.1184 0.0333 0.032 Uiso 1 1 calc R . .
H12B H -0.0277 0.2073 0.0783 0.032 Uiso 1 1 calc R . .
C10 C 0.1100(3) 0.0009(6) 0.3455(4) 0.0302(15) Uani 1 1 d . . .
H10A H 0.1012 -0.0936 0.3382 0.036 Uiso 1 1 calc R . .
H10B H 0.1387 0.0100 0.3930 0.036 Uiso 1 1 calc R . .
C8 C 0.1380(3) 0.0473(7) 0.2805(4) 0.0298(15) Uani 1 1 d . . .
H8A H 0.1622 -0.0246 0.2661 0.036 Uiso 1 1 calc R . .
H8B H 0.1071 0.0657 0.2363 0.036 Uiso 1 1 calc R . .
C7 C 0.2121(3) 0.4134(7) 0.3259(4) 0.0359(17) Uani 1 1 d . . .
H7A H 0.2269 0.3789 0.3766 0.054 Uiso 1 1 calc R . .
H7B H 0.1999 0.5047 0.3298 0.054 Uiso 1 1 calc R . .
H7C H 0.2426 0.4093 0.2953 0.054 Uiso 1 1 calc R . .
C11 C -0.0118(3) -0.0252(7) 0.1300(4) 0.0368(17) Uani 1 1 d . . .
H11A H -0.0028 -0.0863 0.1727 0.055 Uiso 1 1 calc R . .
H11B H 0.0235 0.0223 0.1241 0.055 Uiso 1 1 calc R . .
H11C H -0.0264 -0.0743 0.0835 0.055 Uiso 1 1 calc R . .
C5 C 0.1564(4) 0.0962(8) 0.0723(4) 0.0426(19) Uani 1 1 d . . .
H5A H 0.1799 0.0693 0.0349 0.064 Uiso 1 1 calc R . .
H5B H 0.1161 0.0687 0.0551 0.064 Uiso 1 1 calc R . .
H5C H 0.1717 0.0549 0.1211 0.064 Uiso 1 1 calc R . .
C2 C 0.0849(5) 0.6535(9) 0.2478(5) 0.062(3) Uani 1 1 d . . .
H2A H 0.0756 0.7468 0.2397 0.092 Uiso 1 1 calc R . .
H2B H 0.1200 0.6442 0.2864 0.092 Uiso 1 1 calc R . .
H2C H 0.0525 0.6089 0.2648 0.092 Uiso 1 1 calc R . .
C1 C 0.0355(3) 0.6353(7) 0.0812(4) 0.0365(17) Uani 1 1 d . . .
H1A H -0.0013 0.6146 0.0969 0.055 Uiso 1 1 calc R . .
H1B H 0.0372 0.5909 0.0332 0.055 Uiso 1 1 calc R . .
H1C H 0.0385 0.7302 0.0745 0.055 Uiso 1 1 calc R . .
C6 C 0.2379(3) 0.3211(9) 0.1198(5) 0.046(2) Uani 1 1 d . . .
H6A H 0.2509 0.2773 0.1685 0.069 Uiso 1 1 calc R . .
H6B H 0.2418 0.4162 0.1266 0.069 Uiso 1 1 calc R . .
H6C H 0.2616 0.2917 0.0834 0.069 Uiso 1 1 calc R . .
C4 C 0.1381(4) 0.3505(9) -0.0151(4) 0.048(2) Uani 1 1 d . . .
H4A H 0.1581 0.3030 -0.0503 0.072 Uiso 1 1 calc R . .
H4B H 0.1491 0.4433 -0.0142 0.072 Uiso 1 1 calc R . .
H4C H 0.0961 0.3423 -0.0318 0.072 Uiso 1 1 calc R . .
C3 C 0.1649(4) 0.6575(8) 0.1335(5) 0.051(2) Uani 1 1 d . . .
H3A H 0.1746 0.6177 0.0877 0.077 Uiso 1 1 calc R . .
H3B H 0.1971 0.6445 0.1760 0.077 Uiso 1 1 calc R . .
H3C H 0.1580 0.7515 0.1251 0.077 Uiso 1 1 calc R . .
 
loop_
 _atom_site_aniso_label
 _atom_site_aniso_U_11
 _atom_site_aniso_U_22
 _atom_site_aniso_U_33
 _atom_site_aniso_U_23
 _atom_site_aniso_U_13
 _atom_site_aniso_U_12
Eu1 0.0267(3) 0.0279(3) 0.0097(2) 0.000 -0.00218(17) 0.000
Si3 0.0335(10) 0.0346(10) 0.0188(9) -0.0040(8) 0.0010(8) 0.0046(8)
Si1 0.0299(9) 0.0314(10) 0.0108(8) -0.0003(7) 0.0004(7) -0.0004(7)
Si4 0.0259(8) 0.0313(10) 0.0128(8) -0.0017(7) -0.0033(7) -0.0020(7)
Si2 0.0401(10) 0.0326(10) 0.0168(9) -0.0035(8) -0.0026(8) 0.0035(8)
O1 0.025(2) 0.035(3) 0.020(2) -0.001(2) -0.0070(18) 0.0033(19)
O2 0.032(2) 0.031(2) 0.0073(19) -0.0020(18) -0.0035(17) -0.0007(19)
N1 0.033(3) 0.032(3) 0.012(3) -0.004(2) -0.004(2) 0.003(2)
C9 0.041(4) 0.037(4) 0.011(3) -0.002(3) -0.005(3) 0.001(3)
C12 0.038(3) 0.031(3) 0.008(3) 0.000(3) -0.002(2) 0.000(3)
C10 0.038(4) 0.028(3) 0.019(3) -0.001(3) -0.009(3) 0.004(3)
C8 0.037(4) 0.034(4) 0.015(3) -0.001(3) -0.003(3) 0.009(3)
C7 0.033(4) 0.044(4) 0.028(4) -0.007(3) -0.002(3) -0.007(3)
C11 0.042(4) 0.037(4) 0.027(4) -0.006(3) -0.006(3) 0.007(3)
C5 0.054(5) 0.047(5) 0.023(4) -0.011(3) -0.005(3) 0.014(4)
C2 0.097(7) 0.052(5) 0.030(5) -0.014(4) -0.005(4) 0.027(5)
C1 0.050(4) 0.041(4) 0.017(3) 0.002(3) -0.001(3) 0.009(3)
C6 0.039(4) 0.058(5) 0.040(5) -0.015(4) 0.004(3) 0.003(4)
C4 0.059(5) 0.070(6) 0.019(4) 0.005(4) 0.017(4) 0.022(4)
C3 0.056(5) 0.035(4) 0.055(6) 0.001(4) -0.009(4) -0.008(4)
 
_geom_special_details
;
 All esds (except the esd in the dihedral angle between two l.s. planes)
 are estimated using the full covariance matrix.  The cell esds are taken
 into account individually in the estimation of esds in distances, angles
 and torsion angles; correlations between esds in cell parameters are only
 used when they are defined by crystal symmetry.  An approximate (isotropic)
 treatment of cell esds is used for estimating esds involving l.s. planes.
;
 
loop_
 _geom_bond_atom_site_label_1
 _geom_bond_atom_site_label_2
 _geom_bond_distance
 _geom_bond_site_symmetry_2
 _geom_bond_publ_flag
Eu1 O2 2.602(4) . ?
Eu1 O2 2.602(4) 2 ?
Eu1 N1 2.765(5) 2 ?
Eu1 N1 2.765(5) . ?
Eu1 Si1 3.157(2) 2 ?
Eu1 Si1 3.157(2) . ?
Eu1 C12 3.237(6) 2 ?
Eu1 C12 3.237(6) . ?
Eu1 Si4 3.493(3) 2 ?
Eu1 Si4 3.493(3) . ?
Si3 C5 1.873(8) . ?
Si3 C6 1.885(8) . ?
Si3 C4 1.889(8) . ?
Si3 Si1 2.339(3) . ?
Si1 Si4 2.318(3) . ?
Si1 Si2 2.342(3) . ?
Si4 O1 1.659(5) . ?
Si4 O2 1.721(5) . ?
Si4 C7 1.875(7) . ?
Si2 C1 1.881(7) . ?
Si2 C3 1.888(9) . ?
Si2 C2 1.891(8) . ?
O1 C8 1.421(8) . ?
O2 C9 1.440(7) . ?
N1 C10 1.479(8) 2 ?
N1 C11 1.479(9) . ?
N1 C12 1.486(8) . ?
C9 C12 1.507(10) 2 ?
C12 C9 1.506(10) 2 ?
C10 N1 1.479(8) 2 ?
C10 C8 1.515(9) . ?
 
loop_
 _geom_angle_atom_site_label_1
 _geom_angle_atom_site_label_2
 _geom_angle_atom_site_label_3
 _geom_angle
 _geom_angle_site_symmetry_1
 _geom_angle_site_symmetry_3
 _geom_angle_publ_flag
O2 Eu1 O2 143.80(19) . 2 ?
O2 Eu1 N1 63.08(15) . 2 ?
O2 Eu1 N1 148.90(14) 2 2 ?
O2 Eu1 N1 148.91(14) . . ?
O2 Eu1 N1 63.08(15) 2 . ?
N1 Eu1 N1 99.0(2) 2 . ?
O2 Eu1 Si1 102.07(11) . 2 ?
O2 Eu1 Si1 65.43(10) 2 2 ?
N1 Eu1 Si1 99.05(12) 2 2 ?
N1 Eu1 Si1 105.94(12) . 2 ?
O2 Eu1 Si1 65.43(10) . . ?
O2 Eu1 Si1 102.07(11) 2 . ?
N1 Eu1 Si1 105.94(12) 2 . ?
N1 Eu1 Si1 99.05(12) . . ?
Si1 Eu1 Si1 141.15(7) 2 . ?
O2 Eu1 C12 47.12(15) . 2 ?
O2 Eu1 C12 146.76(15) 2 2 ?
N1 Eu1 C12 27.24(16) 2 2 ?
N1 Eu1 C12 124.28(16) . 2 ?
Si1 Eu1 C12 82.02(13) 2 2 ?
Si1 Eu1 C12 107.80(13) . 2 ?
O2 Eu1 C12 146.76(15) . . ?
O2 Eu1 C12 47.12(15) 2 . ?
N1 Eu1 C12 124.28(16) 2 . ?
N1 Eu1 C12 27.24(16) . . ?
Si1 Eu1 C12 107.80(13) 2 . ?
Si1 Eu1 C12 82.02(13) . . ?
C12 Eu1 C12 150.9(2) 2 . ?
O2 Eu1 Si4 139.33(10) . 2 ?
O2 Eu1 Si4 28.28(10) 2 2 ?
N1 Eu1 Si4 124.82(11) 2 2 ?
N1 Eu1 Si4 71.61(12) . 2 ?
Si1 Eu1 Si4 40.41(5) 2 2 ?
Si1 Eu1 Si4 129.10(5) . 2 ?
C12 Eu1 Si4 118.78(12) 2 2 ?
C12 Eu1 Si4 67.49(12) . 2 ?
O2 Eu1 Si4 28.28(10) . . ?
O2 Eu1 Si4 139.33(10) 2 . ?
N1 Eu1 Si4 71.61(12) 2 . ?
N1 Eu1 Si4 124.82(11) . . ?
Si1 Eu1 Si4 129.10(5) 2 . ?
Si1 Eu1 Si4 40.41(5) . . ?
C12 Eu1 Si4 67.49(12) 2 . ?
C12 Eu1 Si4 118.78(12) . . ?
Si4 Eu1 Si4 157.31(7) 2 . ?
C5 Si3 C6 106.3(4) . . ?
C5 Si3 C4 106.8(4) . . ?
C6 Si3 C4 108.3(4) . . ?
C5 Si3 Si1 110.2(3) . . ?
C6 Si3 Si1 114.9(3) . . ?
C4 Si3 Si1 110.0(3) . . ?
Si4 Si1 Si3 101.40(10) . . ?
Si4 Si1 Si2 99.81(9) . . ?
Si3 Si1 Si2 105.17(10) . . ?
Si4 Si1 Eu1 77.62(8) . . ?
Si3 Si1 Eu1 142.63(9) . . ?
Si2 Si1 Eu1 111.85(8) . . ?
O1 Si4 O2 103.0(2) . . ?
O1 Si4 C7 102.0(3) . . ?
O2 Si4 C7 107.7(3) . . ?
O1 Si4 Si1 115.21(18) . . ?
O2 Si4 Si1 101.33(16) . . ?
C7 Si4 Si1 125.4(3) . . ?
O1 Si4 Eu1 98.58(17) . . ?
O2 Si4 Eu1 45.73(14) . . ?
C7 Si4 Eu1 150.0(2) . . ?
Si1 Si4 Eu1 61.97(6) . . ?
C1 Si2 C3 106.3(4) . . ?
C1 Si2 C2 105.8(4) . . ?
C3 Si2 C2 106.2(5) . . ?
C1 Si2 Si1 108.1(3) . . ?
C3 Si2 Si1 117.7(3) . . ?
C2 Si2 Si1 112.0(3) . . ?
C8 O1 Si4 123.7(4) . . ?
C9 O2 Si4 117.7(4) . . ?
C9 O2 Eu1 116.4(4) . . ?
Si4 O2 Eu1 106.00(19) . . ?
C10 N1 C11 111.1(5) 2 . ?
C10 N1 C12 113.4(5) 2 . ?
C11 N1 C12 107.7(5) . . ?
C10 N1 Eu1 122.3(4) 2 . ?
C11 N1 Eu1 106.2(4) . . ?
C12 N1 Eu1 94.4(4) . . ?
O2 C9 C12 109.4(5) . 2 ?
N1 C12 C9 113.9(5) . 2 ?
N1 C12 Eu1 58.4(3) . . ?
C9 C12 Eu1 86.6(3) 2 . ?
N1 C10 C8 116.4(5) 2 . ?
O1 C8 C10 114.6(5) . . ?
 
loop_
 _geom_torsion_atom_site_label_1
 _geom_torsion_atom_site_label_2
 _geom_torsion_atom_site_label_3
 _geom_torsion_atom_site_label_4
 _geom_torsion
 _geom_torsion_site_symmetry_1
 _geom_torsion_site_symmetry_2
 _geom_torsion_site_symmetry_3
 _geom_torsion_site_symmetry_4
 _geom_torsion_publ_flag
C5 Si3 Si1 Si4 82.3(3) . . . . ?
C6 Si3 Si1 Si4 -37.7(3) . . . . ?
C4 Si3 Si1 Si4 -160.2(3) . . . . ?
C5 Si3 Si1 Si2 -174.1(3) . . . . ?
C6 Si3 Si1 Si2 65.9(3) . . . . ?
C4 Si3 Si1 Si2 -56.6(3) . . . . ?
C5 Si3 Si1 Eu1 -2.2(3) . . . . ?
C6 Si3 Si1 Eu1 -122.2(3) . . . . ?
C4 Si3 Si1 Eu1 115.3(3) . . . . ?
O2 Eu1 Si1 Si4 16.90(12) . . . . ?
O2 Eu1 Si1 Si4 160.96(11) 2 . . . ?
N1 Eu1 Si1 Si4 -32.69(13) 2 . . . ?
N1 Eu1 Si1 Si4 -134.82(13) . . . . ?
Si1 Eu1 Si1 Si4 95.30(7) 2 . . . ?
C12 Eu1 Si1 Si4 -4.26(14) 2 . . . ?
C12 Eu1 Si1 Si4 -156.16(13) . . . . ?
Si4 Eu1 Si1 Si4 151.57(8) 2 . . . ?
O2 Eu1 Si1 Si3 109.54(17) . . . . ?
O2 Eu1 Si1 Si3 -106.41(16) 2 . . . ?
N1 Eu1 Si1 Si3 59.95(18) 2 . . . ?
N1 Eu1 Si1 Si3 -42.18(17) . . . . ?
Si1 Eu1 Si1 Si3 -172.06(14) 2 . . . ?
C12 Eu1 Si1 Si3 88.38(18) 2 . . . ?
C12 Eu1 Si1 Si3 -63.52(17) . . . . ?
Si4 Eu1 Si1 Si3 -115.79(13) 2 . . . ?
Si4 Eu1 Si1 Si3 92.64(15) . . . . ?
O2 Eu1 Si1 Si2 -78.84(13) . . . . ?
O2 Eu1 Si1 Si2 65.22(12) 2 . . . ?
N1 Eu1 Si1 Si2 -128.42(14) 2 . . . ?
N1 Eu1 Si1 Si2 129.45(13) . . . . ?
Si1 Eu1 Si1 Si2 -0.43(7) 2 . . . ?
C12 Eu1 Si1 Si2 -100.00(14) 2 . . . ?
C12 Eu1 Si1 Si2 108.11(14) . . . . ?
Si4 Eu1 Si1 Si2 55.84(10) 2 . . . ?
Si4 Eu1 Si1 Si2 -95.73(10) . . . . ?
Si3 Si1 Si4 O1 -55.4(2) . . . . ?
Si2 Si1 Si4 O1 -163.2(2) . . . . ?
Eu1 Si1 Si4 O1 86.34(19) . . . . ?
Si3 Si1 Si4 O2 -165.83(18) . . . . ?
Si2 Si1 Si4 O2 86.36(18) . . . . ?
Eu1 Si1 Si4 O2 -24.05(17) . . . . ?
Si3 Si1 Si4 C7 72.6(3) . . . . ?
Si2 Si1 Si4 C7 -35.2(3) . . . . ?
Eu1 Si1 Si4 C7 -145.6(3) . . . . ?
Si3 Si1 Si4 Eu1 -141.79(9) . . . . ?
Si2 Si1 Si4 Eu1 110.41(8) . . . . ?
O2 Eu1 Si4 O1 99.9(3) . . . . ?
O2 Eu1 Si4 O1 -143.4(2) 2 . . . ?
N1 Eu1 Si4 O1 32.8(2) 2 . . . ?
N1 Eu1 Si4 O1 -55.5(2) . . . . ?
Si1 Eu1 Si4 O1 119.52(17) 2 . . . ?
Si1 Eu1 Si4 O1 -114.06(18) . . . . ?
C12 Eu1 Si4 O1 61.5(2) 2 . . . ?
C12 Eu1 Si4 O1 -86.9(2) . . . . ?
Si4 Eu1 Si4 O1 172.65(17) 2 . . . ?
O2 Eu1 Si4 O2 116.8(3) 2 . . . ?
N1 Eu1 Si4 O2 -67.1(2) 2 . . . ?
N1 Eu1 Si4 O2 -155.3(2) . . . . ?
Si1 Eu1 Si4 O2 19.7(2) 2 . . . ?
Si1 Eu1 Si4 O2 146.1(2) . . . . ?
C12 Eu1 Si4 O2 -38.3(2) 2 . . . ?
C12 Eu1 Si4 O2 173.3(2) . . . . ?
Si4 Eu1 Si4 O2 72.8(2) 2 . . . ?
O2 Eu1 Si4 C7 -33.1(5) . . . . ?
O2 Eu1 Si4 C7 83.7(5) 2 . . . ?
N1 Eu1 Si4 C7 -100.2(5) 2 . . . ?
N1 Eu1 Si4 C7 171.6(5) . . . . ?
Si1 Eu1 Si4 C7 -13.4(5) 2 . . . ?
Si1 Eu1 Si4 C7 113.0(5) . . . . ?
C12 Eu1 Si4 C7 -71.4(5) 2 . . . ?
C12 Eu1 Si4 C7 140.2(5) . . . . ?
Si4 Eu1 Si4 C7 39.7(5) 2 . . . ?
O2 Eu1 Si4 Si1 -146.1(2) . . . . ?
O2 Eu1 Si4 Si1 -29.31(17) 2 . . . ?
N1 Eu1 Si4 Si1 146.82(14) 2 . . . ?
N1 Eu1 Si4 Si1 58.58(16) . . . . ?
Si1 Eu1 Si4 Si1 -126.42(10) 2 . . . ?
C12 Eu1 Si4 Si1 175.61(14) 2 . . . ?
C12 Eu1 Si4 Si1 27.18(15) . . . . ?
Si4 Eu1 Si4 Si1 -73.29(6) 2 . . . ?
Si4 Si1 Si2 C1 -159.5(3) . . . . ?
Si3 Si1 Si2 C1 95.8(3) . . . . ?
Eu1 Si1 Si2 C1 -79.0(3) . . . . ?
Si4 Si1 Si2 C3 80.2(3) . . . . ?
Si3 Si1 Si2 C3 -24.6(3) . . . . ?
Eu1 Si1 Si2 C3 160.7(3) . . . . ?
Si4 Si1 Si2 C2 -43.3(4) . . . . ?
Si3 Si1 Si2 C2 -148.0(3) . . . . ?
Eu1 Si1 Si2 C2 37.2(3) . . . . ?
O2 Si4 O1 C8 60.2(5) . . . . ?
C7 Si4 O1 C8 171.9(5) . . . . ?
Si1 Si4 O1 C8 -49.1(5) . . . . ?
Eu1 Si4 O1 C8 13.8(5) . . . . ?
O1 Si4 O2 C9 43.0(5) . . . . ?
C7 Si4 O2 C9 -64.4(5) . . . . ?
Si1 Si4 O2 C9 162.5(4) . . . . ?
Eu1 Si4 O2 C9 132.3(5) . . . . ?
O1 Si4 O2 Eu1 -89.3(2) . . . . ?
C7 Si4 O2 Eu1 163.3(3) . . . . ?
Si1 Si4 O2 Eu1 30.16(19) . . . . ?
O2 Eu1 O2 C9 127.1(4) 2 . . . ?
N1 Eu1 O2 C9 -31.7(4) 2 . . . ?
N1 Eu1 O2 C9 -91.5(5) . . . . ?
Si1 Eu1 O2 C9 62.5(4) 2 . . . ?
Si1 Eu1 O2 C9 -156.5(4) . . . . ?
C12 Eu1 O2 C9 -4.4(4) 2 . . . ?
C12 Eu1 O2 C9 -143.8(4) . . . . ?
Si4 Eu1 O2 C9 81.4(4) 2 . . . ?
Si4 Eu1 O2 C9 -133.0(5) . . . . ?
O2 Eu1 O2 Si4 -99.8(2) 2 . . . ?
N1 Eu1 O2 Si4 101.4(2) 2 . . . ?
N1 Eu1 O2 Si4 41.5(4) . . . . ?
Si1 Eu1 O2 Si4 -164.51(17) 2 . . . ?
Si1 Eu1 O2 Si4 -23.44(16) . . . . ?
C12 Eu1 O2 Si4 128.6(3) 2 . . . ?
C12 Eu1 O2 Si4 -10.8(4) . . . . ?
Si4 Eu1 O2 Si4 -145.57(14) 2 . . . ?
O2 Eu1 N1 C10 130.2(4) . . . 2 ?
O2 Eu1 N1 C10 -74.3(4) 2 . . 2 ?
N1 Eu1 N1 C10 78.9(4) 2 . . 2 ?
Si1 Eu1 N1 C10 -23.3(4) 2 . . 2 ?
Si1 Eu1 N1 C10 -173.3(4) . . . 2 ?
C12 Eu1 N1 C10 67.8(5) 2 . . 2 ?
C12 Eu1 N1 C10 -121.3(6) . . . 2 ?
Si4 Eu1 N1 C10 -45.0(4) 2 . . 2 ?
Si4 Eu1 N1 C10 152.7(4) . . . 2 ?
O2 Eu1 N1 C11 1.4(6) . . . . ?
O2 Eu1 N1 C11 157.0(5) 2 . . . ?
N1 Eu1 N1 C11 -49.9(4) 2 . . . ?
Si1 Eu1 N1 C11 -152.1(4) 2 . . . ?
Si1 Eu1 N1 C11 58.0(4) . . . . ?
C12 Eu1 N1 C11 -60.9(5) 2 . . . ?
C12 Eu1 N1 C11 109.9(6) . . . . ?
Si4 Eu1 N1 C11 -173.7(4) 2 . . . ?
Si4 Eu1 N1 C11 23.9(5) . . . . ?
O2 Eu1 N1 C12 -108.5(4) . . . . ?
O2 Eu1 N1 C12 47.1(3) 2 . . . ?
N1 Eu1 N1 C12 -159.8(4) 2 . . . ?
Si1 Eu1 N1 C12 98.0(3) 2 . . . ?
Si1 Eu1 N1 C12 -51.9(3) . . . . ?
C12 Eu1 N1 C12 -170.8(2) 2 . . . ?
Si4 Eu1 N1 C12 76.4(3) 2 . . . ?
Si4 Eu1 N1 C12 -86.0(3) . . . . ?
Si4 O2 C9 C12 -120.0(5) . . . 2 ?
Eu1 O2 C9 C12 7.4(7) . . . 2 ?
C10 N1 C12 C9 58.4(7) 2 . . 2 ?
C11 N1 C12 C9 -178.2(5) . . . 2 ?
Eu1 N1 C12 C9 -69.7(5) . . . 2 ?
C10 N1 C12 Eu1 128.1(5) 2 . . . ?
C11 N1 C12 Eu1 -108.6(5) . . . . ?
O2 Eu1 C12 N1 116.7(4) . . . . ?
O2 Eu1 C12 N1 -117.0(4) 2 . . . ?
N1 Eu1 C12 N1 24.4(5) 2 . . . ?
Si1 Eu1 C12 N1 -90.4(3) 2 . . . ?
Si1 Eu1 C12 N1 128.3(3) . . . . ?
C12 Eu1 C12 N1 15.7(3) 2 . . . ?
Si4 Eu1 C12 N1 -93.4(3) 2 . . . ?
Si4 Eu1 C12 N1 110.9(3) . . . . ?
O2 Eu1 C12 C9 -122.5(4) . . . 2 ?
O2 Eu1 C12 C9 3.8(3) 2 . . 2 ?
N1 Eu1 C12 C9 145.2(4) 2 . . 2 ?
N1 Eu1 C12 C9 120.8(6) . . . 2 ?
Si1 Eu1 C12 C9 30.4(4) 2 . . 2 ?
Si1 Eu1 C12 C9 -110.9(4) . . . 2 ?
C12 Eu1 C12 C9 136.5(4) 2 . . 2 ?
Si4 Eu1 C12 C9 27.4(4) 2 . . 2 ?
Si4 Eu1 C12 C9 -128.3(4) . . . 2 ?
Si4 O1 C8 C10 -91.0(6) . . . . ?
N1 C10 C8 O1 81.6(7) 2 . . . ?
 
_diffrn_measured_fraction_theta_max    0.998
_diffrn_reflns_theta_full              26.38
_diffrn_measured_fraction_theta_full   0.998
_refine_diff_density_max    2.280
_refine_diff_density_min   -1.058
_refine_diff_density_rms    0.225

# SQUEEZE RESULTS (APPEND TO CIF)
# Note: Data are Listed for all Voids in the P1 Unit Cell
# i.e. Centre of Gravity, Solvent Accessible Volume,
# Recovered number of Electrons in the Void and
# Details about the Squeezed Material
loop_
  _platon_squeeze_void_nr
  _platon_squeeze_void_average_x
  _platon_squeeze_void_average_y
  _platon_squeeze_void_average_z
  _platon_squeeze_void_volume
  _platon_squeeze_void_count_electrons
  _platon_squeeze_void_content
   1  0.750  0.250  0.000        43         2 ' '
   2  0.250  0.250  0.500        43         2 ' '
   3  0.250  0.750  0.000        43         2 ' '
   4  0.750  0.750  0.500        43         2 ' '
_platon_squeeze_details
;
;


#===END
